# Supplementary material for: Transcriptomic Analysis Reveals Genes Associated with the Regulation of Peach Fruit Softening and Senescence during Storage
Source: MDPI journal article supplement (doi:10.3390/foods12081648), 2023-04-14
Supplement: s1 [file s1]

Supplementary file S6, BGI\_novel sequences are as follows

>BGI\_novel\_G000319, Pp02:24127171-24128744 -

GTAAAACTCAACTTCAAGAAAAACATACAAATTAAAAAAGCCACACAATTCCTTCTCCCAATGTAAT  
CAACAATATGTTTCTATAGAACACAACCTTCACTGAATTAATAAATAAACAAGCGAACTCTCCAAAA  
TGATCAAACAATTGGGACAGTGTGAGGCCTAACACCACCAAAAAGTATTGAATTTAATACTGAGTTGG  
CAAGTAGGACTTCATCATTACACCACCAAAACCTTTGCCCATCTCACCCAACAGAGGGTCAAGATCA  
TTCCACGTGTACACCCCATATCAAAAGAAACCCGAATTTCCCTCACTTTTTTCTACCCCTAATTAAACCT  
TCTTATAAATATACAACCTGCCCCATGCAAATACCCAACCTCCTCTCTCTCCCTAAAAAAACCATCCAT  
GGAAAACCGCCGGCAAAAGAGCACCTCCGGCGACACATTCTCCTTTCCAAGCACTTCGATCCACTAG  
CAAGACTCCGATTTGCAATTTGGATGCTTTACCCCTGACTCAGCCTCCAGCACTGATCCCTGCAAAGA  
CTCCCCGGCAGACCATTGTTCTTCAATGGCAGGCTCTTACCACATGCCTTTTCATGTCAACCAATTAG  
CAACGGTTTTATGGGTTTCGATAGTAATTTACGGAGAACAAGCCGGATGAGCAGCATTAGCAGCAAGG  
ACTCTCTCATGTCTCAAGAAGCAACAGCACCAACAGCAGGAGCAGCAGCTGCAGCAGCAGCGCAA  
GGACAAGCTCAAGCGACAACCTCTGAGAGGAAATTGGTGCACCAAAACAAATTGGGTTCTAGAGCTTG  
ATCAGATAGATACAAAGGAAACAGAGCTAATAATCTCGAGGTGGACAAGTTTATGGTTCTTCTCAGA  
GATGGCAATTCATAACAGCTGTGCCTGTACCGGCTTCTTTAAGCGGTGACAATTCTCGGAAGAAGGCG  
AAAGTGGATCAGCTTGAAGGGAAGGAGAAACCCATCAAGGGAAGGGAAGAGTCCGGGTGAAGAC  
GGTGGTGGTCCCCCGGAGTTTGGCCGGAGGTTTTCCGGTGGCTTGTTTGGACCTGCAGAAAGTGTA  
ACGCAATGGAACCGTCCAACAAAAGTAGTGATTATGTAATTAATAAGCTGCGAATTGATAAATGTGA  
AGTGAAAAATGATTTTTTTAACTTGTTTATCAAGTTTGTAATTTGTTTCATGGGTTTGAGGTTAGGATT  
TTGAGGTTTGCTTTGAAAGTAGATAACTGACTTTATACTTTAGCTTTGGCTTTGGCTTTTGATCACTTTC  
AACTTTGAAGAAAAGCAAAAGGAAATATATATATATATATATATATCTGGGAACGTTAACCAGCAAA  
AGCAATTTGGCTTGTTAAATAGAGCTTTTGTCAATGTGTTTCGGTTATTGTTTCAAATTCCTCAGAGC  
GAGCGTTAATCTTGAAGTTGAAGCTGTTGATATGGCAATGATATTCTCCATAAATCCTTTGGAAACAT  
AAACTAGTTGGTTGACTGAATAGTGATCAGTCAACCAAATCTTTATCTAAAAGCCAAGGCTTGTCGTG

>BGI\_novel\_G000473, Pp04:12563396-12565812 -

TCTATTTTCACGCTCTCTCTCCTCCTTCCCTCACATCACGTTGCTTCTTCTCACAATCTCTTCACAGAG  
CCCACTCCCCTCCTTCTCTTCAATTCTGCCTACAGTAGTTTTTTCTTGTTGGATCAATTGAAGCGCATTG  
CTGAGCCACAAGACTCAGAAAGGTATACCTACCCAAAATGTGATGGCTGCATGCAATTTATATTGCA  
TGTGCCGGATGGGAAGGCACGGCCCATGACACAAGGATATTTCTATCGGCTTTACGTGATCAAAGTTT  
GAATTTTCCTAACTTCCAATGGAAAATTTTATCTAGTAGATGCGGGATACCCACAAATGAGAGGCTA  
CTTAGGACCATATAAAGGTGAAAGATATCATCATCTTCCTGATTTTCGTAGGGGTGTTCAACCAATGGG  
TCATAAAGAGGTATTCAATCATAACACTCTTCTCTGAGAAGTGTTATTGAACGCACTTTTGGAGTATG  
GAAAAAGAGATGGAGTATTTACGCGACATGCCTAGTTATCCTTTTGCAAAACAAGTCAAAATAGTTAT  
TGCAACCATGCACTTCATAACTATATAAGAAGACATGCCAAACGTGATTGTCATTTTGATGAAAGTGA  
AGATGACCTAAATGGTACTCAAGATGAAGAGATTGAGAGAGAGGTTGATGCACAACAAGAAGATGGT  
CCTGTAACACAAGAAATGGAGGCATTGAGAAATCATATAACCGCAAGTTTAATGAGTTCATCTGGTTAG  
AAATGTATATGATTGCTTATTTATGACTAGTTTAATTTTTGTTATGACCATATTATTGACAATATATTTATT  
TTAATTGAATACTTTATTTATTTTATAATTAAAA

>BGI\_novel\_G000666, Pp06:15003576-15004186 .

CAATTTCTTCTCCATCACTAACAAAGATGACCCAAAAACCTAGAGAAGTGTAATTTGAAACCACA  
AGAAGATAAAGCTTTTATGCAGAGGTTGAGCGTAGATTAGTGAAGATGGTGTATTGGAAAAATTCAAT

CAAATAAAAAACATTTTGGGAATTTTGTCTACCAAAAAGTTTATATCCCGACAGTGCTGCCCCGGATCTCAA  
ACACCTCAAGCCATTGCATCTCAAATCAAGACCATCAACCAACAATACTCTCTATGGAAGAAGAGAAG  
TTTGAAATAAAGGCAACTCAAACCTCAATAAGTGGCTCAAATCTTGGTCATGCAGTGAGTGCCAATTCT  
TCATATCTTAACGTTGTATTATAATTATTTATGAACCAACTTATTTTCCTTTAACCCATGTATAGTGC  
TTTCAAGCAAATTCATATTTTGAATTATAATAGGCTTCTAAATAGATCTTTTGAGTTGTATCATGCTTGA  
CACATCTTAAAATATTGCTCAAAATGGAACGATCAATTTCAATCTCCTATGGGAAGATCATCTTAGCATA  
GTAAGGAGACCATTAATTCAAAGGATGATGCAAAAGATGTGGTAATGGCATATTCC

>BGI\_novel\_G000725, Pp06:27354244-27359524 +

ATGGAATTCACATGCTTGTAAGGTGTCATCCGCTCCAAACAAGATCAAATTCAATGCATATTATCTAAAA  
AGATGATGAAAAGCCACAAGAAAAGGAAGAAAAAGAGAAAACAATTCAACAATGGAATTATGGGCAA  
CCACACCAACATAGACAAGATGAAGTGGGAGTTATGGATTGTATTAATAAGGAATGGTGGTGTGGA  
ATTCATCATAATGTTCCCTCCCTCTTAGCCCTATAAACAGAGAAGTCTTCAAGCTTCAAAACACACACCA  
AGCTCACAATCTTCTCTTGAGCTCTCTCTCCTTCCCAATTCTTCTAGTTCTAAATTTCTGTTTTAGTTT  
TATTTTTTGGGGAACCTAACTCCCTAGCTAAGGCTAAGGGGGAAGCTTTAATATGAGTATGTAATTTTA  
TTAATTTGATCCAACTTAAGCTTTAATGTGAATTTGTAGTTTTGTTCAAATGGAATTTGTAGTTTTCTT  
TTTAATTAATGATGAATGTTTGATAATCTATTTCATGGGTCAATAATGTATTTCCCATGTGTAGTAAAA  
ACTTTCATGCTTTTAAAAGATGAGACAATTACTAAGATAGATAGAATTCGATGAAGATTATTTTTTGAT  
AGTTTGTTGCCAATGGTACAAGTTATGCTTAGAATACTTCTAAAGGAAATTAATAATAGTTTAAATTATT  
TTGAACAACCTACAATGGAATGGATCAAATTAATAAGAGTTGCATGCTTATGTTAAAGCGGAACCCCA  
AAGCCTTAATGTTTAAATCAATTTAATTTTCTTTAAATCAAATCTTGCATAAATCTACTTCTCAATCTTAAT  
TGTTCTATCTCAACTCTGTTATTTCTTTACACTACTCTCTGTGGATACCACACTTGGACTTCCAACTA  
CACTGCTATACGACACCTTCACTTGGGTTTTGCAAAGTGGTACAAATCAATTGGCGCCGTTGTTCCGGG  
AGCGGCTTGTCAAAGAGTACAGAGATCCCTTGGTTGGAGGTTTGCTGCTTATGTGAAATTCTTCACAT  
CCGGAAATGAAAGGAGCTTATGAGGAGCGTTGTGCTGCTATTGGAACTTCAAACAATAGTATTCTCC  
TTTTTCCAACACTTATAATCCAGCAACAAGGAATCATCCAACTTTTGTTGGAGCAATGAGTCACAACA  
TCAGAAGCAAAATCAAAGGTATGATACCTTGCTTGGTCAATTGGGTGAAGAGAATAGGGAAATTGGCA  
GCTTTACCCCTGGCTCACCTAATTTATCTACTAATATCCTTATTTGAAACTCAATCACAATGCCCTTA  
TAAAACTCCTTATTGACAGCCTATTGCCCATCCTTCACTTCGTTTTTTTTCTTAGTTGTTGCTCTTCCT  
CTTCCCTTCTCTTTCTTCTCTTCTTCTTCTGCCAAACCTCACAAAATCCACTTCAACCATAGAATCT  
CCCTAAACTTTATCTCATCTTAGTTATATCTTCCAAGTGGAGCTGATTTCAACCTCAAAGTTCAACCCC  
AAATTTGGACCGGACCCTAGCCAAGGCGGACTCTCCACCTCCGTTGTCGGCCTCCACAACAAAGCC  
ATAGTCTTGACGTGCCACCTCCATTGTCGACTTCCACCACAAAGCCACGGCACCTTCTTGTGATCTT  
CACTGTGAAATGGACACAATTGCAATTTGGTTTGCTACAATGGCAAATGGGTAACCTCAAAGAAGAT  
GTGCACATATGAAGGGGGTGAATCAAAGGCATAATAGTTTCGCAAAACATCACGTTTGGTGAGCTTT  
TGGAACGGGTGCATAAGATTGTTAATAGAGACAACAGGGAAGACAAGCTTTGTTTAAAGTTCTCAATT  
TCAATATCCTCGAATGAGTGTAAGCATATCAAGATTGAGGACAATGATGATGTTTAAATTTTATTAAG  
TACATTTGTGAAGTAATTCCTTCAAAAGTGGCTTCTTACTGGTGAGCATAGAAGACAGAGGAGTGAC  
AAATGTTGTAGGTGATCGTATACATATCACGACGGATATGAGTTGGATGGCCTGTTCTTCAAATGCCATA  
GTTGAAAGCAATGGTGATGTACATGGTGATTTTGGAAACAGAATATTTAGATCTGATTGATTTTAAAGG  
GTGGAGGGGATGCATAGTGGTGATAATGGTACGGAAATGAATGGCTTGCAAATGCACTCAGCCCATCC  
TATTTTGCCCATTTGGAGACATTTTCACAAGTGGGTGTGAGGGGTTTTGGAATAACGTCTGAACCTTC  
TATTCGACATAATTAGAGGCAAATGGGTGAACAAAACGTTGACAATTTGGGTATTGTAAATGATGAAGA  
AGAAGATATTGAAAGTGCGCATTACGGAATAATTGGGATCCAAAATTGGAAGTTGGGAAAATTTTCT

CTAGTAAGGAAGCCCTGTCCAACAAGTTACAGTTGGTGGCTGTGAGAGGTCACCTTTGAATTTAAGGTG  
AAACAGTCTTGCAAGAGTTGATTAGTTGTGGTTTGTCTCAAGGCCCATGCCCATGACGGCTTCGTGC  
ATCTAGTTATGGAGAAAAGAACTTCACGATTGTGAAATATAATCCAGTTCATGAATGTGATATGAGTTTT  
ATACATGACAAGCATCGTCACGCAAGTGCTAAACTCGTTGGTAATGCAGTGAAGCAGAAGTTCAAAG  
ATTCTCGCACAAATATACACAGCAAGTGATATAATCAAAGATGTGAAACAAAACCTTTGGTGTCCCCATTA  
ATTATTGCAAAGCTTGGAGATCGAGGGAGTTAGCTCTAATATCCATTAGAGGTTTCAGTAGAGGAGGCAT  
ATTCTCTCCTTCCAGCTTATTGTCATGAATTAGAGCGTGTGAATTCAGCACAAGGACATACATCCACA  
CCGATGAGAACAATCACTTTTTGTATTTTTATGTTTGTGGGGCATGTATTAGAGGGTTTCAATCTTTG  
AAGCGGCTAGTCATTGCTGTGGATGCCACGCATTTAAAATGTAAATATAAGGGTGTCTTTTTGTTGCC  
AATGCATTTGACGGAAATCGAAATATATATCCTCTTGCTTTTGGAAATTGGGGATTTAGAGACGGATGCAT  
CATGGCATTGGTTTTTTCAGTAAGCTTCATGAAGTCATTGGTGAGTGTCCAAATCTTGTGATTATTTCTAA  
TCGGAATATTAGCATCGAGAATGTGTGGCATAACATTTTTCCAAGGCGCAACATGGCATATGCTTTTACC  
ATATGAAGAGGAACATGAAACGCACCTTCAAATTGAAAAAACGTGATAAATTATTGCTACACTTTGA  
ACAAGTTTCAAATCTTATGGCATCGCTGAATTTGATCGTCATTTTCGCAAGATCAAGGGAAATGATGA  
GGTTGCTCAATATCTTGAAAGTGCAGGATTACACAAGTGGTCTAGAGCTCATAGGG

>BGI\_novel\_G000067, Pp01:20390408-20393408 +

CCTCAATTCATTATTTGAGGTTTATATTGATATTATCCATTTTCGCGGTGTATTCTTAACAACCGGAATTCA  
CAAAATATATTTCTTCCTTAAGGTGTCGATTATAACAAAATCGAACTTTATTAAATTCATCATCTTCTTAT  
GCCAAAGAAATATGTGGCGTACCACAATTTGCAATAATACCTCAAGGGTGTCCATTTAATTGTTGGAA  
CTTCAGGTTCTCAACACTGTTAGATTTTGAACCTTCAGGCCAAAATCATATATTCTCATGGTATGGACATT  
TTTACAATTTTCTGTACATATTTCGGGACTTCAAGCCCTTACATAATTGTCCATATTTTGAGGAACTTCTG  
GCATCTCATTTAATTGCTCATCCATGAGTTTAAAGAACTGCAGGTTCCCTTTTGTATATAGTGACGGTTT  
ACCCAAAATGGTAAATATTTATGCATACATCACTATTCATGTATACGGCACTATTCATATGTACAGTACAT  
TTGCCAGTACAGTTATCATCCATGTGTACGGCATTATGAACCAATACGGTACTGTTACATCATTAAAGGAA  
CCCCAGGTCCTTATTTACATGTCAAGGATCAAGGACCCTCAAGTCCGATCACATGTTTACAAATATAGT  
GCCGGAGAGACTGCCAGCTCTCATATTAACATCATCATCAAGGATCTTCAAGTCCGTGATGTAATTGTATG  
ATGAGGATCAAGGAACTTCTGGTCTGATCTGCATACTGTAAAAAATTCATCATACAGCACATTTAATC  
CATATAAGAAATTGCTGGTAAATAAATTACCGGTATGGACGATAAACCCGCACCATACATTTAAAAGTA  
AAGGCGTGGACGATAAACCCGCACCACCTTTAAATAAATACTGTTGTATGGGTAATAAACCTACACCA  
TACAGTAAATAAAATAAATGTGCGGTAAAGTAAATTTATAAAGTAAAGTGTTAGTATTAGTAACGGTC  
TCCCACTGATAATATGTTTAGTATTACCGAGGGTCCATTTTTGTTAATGGTTAGTAAAAGAAAAGCAGAT  
AAATATAATAGGAAATAATAGAGAAGATAAGGGAGCAGAAAACCTTATCGCTTATTCCTTGCTGAGTGA  
TCCCTTTTTTTTTTTTATTATTATTATTAATTATCTTTGCAACTGTGATCAGGCGTGGGTGGGAGAGAAA  
TGCCAATCAATTTTGCTTTCCCACTTTATCTGCCAATCAATTTTGCTTTCCACCTGCCAATCAACTTTG  
CTTTCCCACTTTGTCTGCCAATCAACTTTGCTTTCTTTATCGGTGGGTTTGCTTTTCTTTATCGGTGGG  
TGGACTGTGCACATGGTTAGCGCAATAACAAAACAGTGAAAACCTCATGAAAGTCTAGGACTTTTCAG  
GTCATCTTCTCAATCAAAGAGGACCCCTTTTTCTTTTCTTTTCTTTTTTTTTTCTTTCTTTTTTTTTTTT  
TTTTATGGATCCCAAGGGCTCAAAGCAGACACTAGAGATACCCAGCTTCTTGAGCCTTCTTGGCTATTG  
GAGTATCAGTCTTAATTTTCATGTCAGGCATAGCGGCATGGCACAAGAGGCGACGGGCTTTGATGGA  
GGCTGGTGGGTCTGAAAAACAAGAGAAAGCCGGCACTGCTGCTGACCAAGTCGCCGGACCCAAACC  
TCTCCAGGACTACGAGCTCTTCGATCAGATCGGGTCGGCAGGACCGAGTCTGGTCTGAAAACGTGACT  
CGGCCAAGGCACTTTCCGGCTCCTGAATCTCGATTGGGCCACCTCAGTGCCTCCTGATTCTTCAGCTCC  
TTCGAAACCTATCATGCCAAGATGATGACTTGACGATTTTAATGGTTTCAGTGCAGCAGTAGAGTCTTG

GTGGTATAGCACACAATCCTCTCGATCAAGACCACACAATCTCAAATAAGGCTCAGCAGTCACCGATT  
GAAGGCAACAGAATTTGATCTTCCTGTACTTGTCTGCTTTAATCACCCACTTCACCCCTCCATGGCAGA  
GATGGGAGACCCCATCGTAGACCACAACGCGTGGCTGAAGAAGAGTGGGTATCACGGGCTTAACCGC  
CGAATCAGCAGTTGGGTAGAGTGGATGGGTACATCATCTTCTCTCCTCCATATGAATTAAATACTGTA  
GGAACACGTGCACAGCCCTGGTATGAAGTGGGAGGGAGCTAGCTGGCCGCCGGAGATGAATTCGGCT  
GTGCTAAGACGGGTTGATGGTGTTCGTAGCTGATCAAACCCCAAACCTTCATTGGATCAATTAGCCT  
CTTGTGGTAGTTCCGCATCTGGGTGTGCAGAGGAAGCTACTGGGTGTGAATAGTGATTGTTTGGCGGG  
TGTTGATCTCGTCAGCTAGCTTTGTTTGGGTCAAGAAGCTGTTATACGACGACGACGGTTTGCTTTTCA  
ATATTGGGTTTGGAAAAGTGGTCGTTGTTGATAACCTTCCGATTGTGAAGGCGGAGATGGCCCAGCAG  
CTCGAAAGAGAAATCCGACGAGTGTTTAGTAAAGTTGGTGTGTTGATGAAATGAGGGAGAGAGATTTG  
GTTTTGGTGAATTTTGGCAGGGAATCAATCACATGCTCTCTGTGAAAGAAACAGAGCTTATGTTTTCT  
TGGCTGGGTTTCAACATAGAATTCAGCTGGAATTGTTGAAAGCAAATTCGTGCTGATAACGTGTTATAA  
AACTGGAGAAGTTTGGAGAGAATTGAGAGAGAGAGAGGAGGAGAACTGATTTTTTCTTCTCATTC  
AGATATATTCCTGATTATGAAGGGATGAACCTTATATAAGCAAAGCCTAAGAAACATGTGGGCTCCAC  
AACTAATTATTTACAACAAAAAATTAATCCCGTTTAGACAAAATCCGTTGACAGGATTATCATTGCATAA  
AGCAAGTCCCTAAAGGACATGTGCTTGAAGCACAAAATTTGTACTCAATATTAATATGCATAAATTACC  
TCAGTGAGTACATTGATGTGATTGCAACA

>BGI\_novel\_G000071, Pp01:20617419-20617829 .

TTTAATTTATGAATTTAATTTACCGCACATTTATATTTATTTAAAAGGGTGGTGCGGGTTTATCGTCCACG  
CCTTTACTTTTATTTAAATGTATGGAGCAGAATTAATGCCATACAAGCACCTTAACCTTTATGAATTTAAT  
TTACCGCACATTTACATTTATTTAAAGTGTGGTGCGGGTTTATCGTCCATACCAGTAATTTATTTACCAGC  
AATTTATTTATGGACTAAATGTGCTGTATGATGAGTTTTTACAATATGCAGATCAGGACCAGAAAGTTCC  
TTGATCCTCATCATACAATTACATCAGGACTTGAAGATCCTTGATGATGATGTTAATATGAGAGCTGGCA  
GTCTCTCCGGTACTATATTTGTAAACATGTAATTGGACTTGAGGGTCCTTGATCCCTG

>BGI\_novel\_G000123, Pp01:37238831-37239585 +

GCCCTATATAAATGGGCTCCTTCATAGTGTGCAAGTCACCCAATTCAAGCCTTTGTTAATTCCTTGGTAG  
TTTTTGCAGTTAATAAATTAGTAGAAGATGGGTATCACAATAATCTTGATAAGGTCCGTAATAAGAGGG  
CCAAGTTTCCCTACACAAAGGAGCAGATAAGGAACGTCTTCAAACGTCAATGACAAGAATGGAGATGG  
TCAACTTTCCAAAGATGAGCTGGACGCAGCCTTCAAAGAACTTGGCTCGATATGGCCTCCTGGTAGAG  
CTTGGTTTGCTCAAAGGTATGCAGATGACGACGGCGATGGCTTCATTCTATAGACAAGGAGCTCAGC  
AAGCTCGTCCAGTATGCCCTAGAATTGAAGTATACACTTAAGTAATTATAGTATTAGTGGGTAAGTAGTT  
CTTGATGTGCTTGCTATAGATATATTCTCAGCAAGCTCGTTGACTATGCCCTCAATTGAAGTTCTCTATA  
TAAGTAATCGTAGTGGTGGAGCTAAACTTGGTGTCTTAGTGACCACAACCACTTCAAGTCTATATGTAA  
CTCCGTCTGTGTGTAAGCGTCTTTAATTACTTGTAAGCAGCCGTAGTACCTATATATGTGTGCAAGGTTG  
AAGGAACGAAAGAGGTGACCTTTTGTTCCTTCGTTACCAGGAAGATGAATTTGAACCCTGATTAT  
GTATAATATATAGTGATTAACAAGAATAAAGTAACAAACTTTGTGTATTGATATCTATTACGTA

>BGI\_novel\_G000124, Pp01:38297552-38300927 -

GTGTGATTAAATGATTAAAGCAAGATTAGAAGAAAGTAGATTGTGAAATAAATTGCTACTATTTTAATTCC  
ACTTTTCCAATACCACCTTCATCAGGAAGTTACATTTTTTTCAAAAACAAAATAAATCAAATTGTGTTG  
TAAAGTAGAGTCTGGAGTCCCCAAAATGCCCTCCCCTAATGTCTATAAATTGGACTTCCCTTAGATA  
GAAATTACACAATCTGAGATGAATGAGAAATGCAAATAAAGAATTCAACAAGAATTCAGATTTCTATTC

CTTTCTCTCTCTCAATTCCTCCTCAATTCTCCAGTTTTATAACACGTTATCAGCACGAATTCTCTTTC  
AAAAATACCAGCTGAATTATCTGATTTTTCTCTGCTTCTGGTTTCTTCTCTCTGTCTCTTCTTTGTTTTGT  
GTCTCAGAGGCACAACAACACCAAATGGGTGTTCTTAAGCAATTGATCTCCATCTTCTTCCCCCTTGCG  
GTTTTGCTAATCACACCCACAACCCTGCAAGATGGCCAAAATGTCATAAAATATATCAAGAAGAGCAG  
CAAGCCCCCGGTTCAATTGTCCTGGCCTCATGGTCTCCAAATATTTCAGTATTTGAAGTATGTATATTCAT  
GAGAAGGAAGCTGGGTCTGAAGTATGTTAGTGCGTTTTCTCCCTTTGGGAGTTTATGGAGCTTCCTCCT  
CGGCTACCAATACCGGGATAGATTATTATACCATTATTGAGGACCCCGCTGCTGCCAAAGGGAAGACTC  
TGCCACAGATCATACTGAGATCCATCATCCAGCAAGGAGCTTCAACAAGGAGAGGATGAAGCAGAAC  
CTTAAATATTCTATTGGGAATTAGGTGAAGATGAAATGAAGAAGATCAACCAAATTCCCCAGCGCAG  
GTTGTATGCAGGAGACTTCTTTGTTTACGAGCTTGGACCTTACAAGTCCCTCCACCAACTTTGGGATGG  
CGACCCCTAGGCCCTATCCTACCCTAGCTACCCAAAACCTTCATGATTTTCTCTTCCAGATATGCAGACGC  
AAATGGAAGCAGCAGATCCACACATCTCAATCAATTTAGCACCACAGAGCAAAAAAAAAAAAAAAAAA  
AAAAAAAAAAAAAAAAAAAAATGAAGAAGAAAAAAGGCTGCTTAATTGCTTTTGCTTTACAGGAAGA  
GGAIAAAAAAAAAAACCAAGAGGGAGGAAGCAACGGGTGGAGCACTCAACTCAAACCTTTTTACGT  
CACTTCACCCCATCTGTCAACAAAAAGCGCTTTTTGCATTGTGGCCGGCATTATTGGTGCTGGCCAACT  
TGCTTCAGGCTTAAGTTTTGAAGTTTTCTTTAAAGCCCCATTGATTGTGCCGCTATCGAAATTACGCATG  
CACACTAAAGAATTGCTAGGCTTACTGATTGACAGCCACCCACTTGGTCTCTTGGTTTTGGAATCTTA  
ACGTGCACTTCGGTTCGGGGTAAATATGACTTCTACTTTATAAAATGATTTAATATAATATCATACTATTTG  
ATCGTGGTGTTGATGAGAACCACCAATAATTGCGTTTACTTTATCGCAAATTTACTTTTACTTAAAGTA  
TGATGAGGAATCGACCCCTACTTTTATAAATTTACTTTTACTGCACATTTAATTTTCATGGAGCAGAATTA  
GTGCCATACACGCACGTTTAATTTATGAATTTAAATTACCGCACAGTTACATTTATTTAAAAGGGTGGT  
GCGGGTTTATCGTCCACGCCTTTACTATTATTAAATGTATGGTGCGGGTTTATCGCCCATACCAGTAATT  
TATTTACCAGCAATTTATTTTATGGATTAAATGTGTTGTATGATGAGTTTTTACAGTAAGCAGATCAGAAC  
CAGAAGTTCCCTGATCCTCATCATACAATTACATCAGGACTTGAAGATCCTTGATGATGATGTTAATATG  
AGAGCTGGCAGTCTCTCCGGTACTATATTTGTAAACATGTGATCGGACTTGAGGGTCCTTGATCCCTGA  
CATGTAAATAAGGACCTGGAGTTCCTTAATGATGTAACAGTACCGTATTGTTTCATAATGCCGTACACAT  
GGGTGATAACTGTACTGGCAAATGTACTGTACACATGAATAATGCCGTACACATTGATGATAACTGTACT  
GGCAAATGTACTGGAACCTGCAGTTCCTTAAACTCATGGATGAGCAATTAATGAGATGCCAGAAGTT  
CCTCAAAATATGGACAATTATGTAAGGGCTTGAAGTCCAGAAATATGTACAGAAAATTGTAAAAATGTC  
CATACCATGAGAATATGTGATTTTGGCCCCGAAGTTCAAAATCTAAAGGGATTGAATGTCCATACCATGA  
GAATATGTGATTTTGGCCCCGATTTTGGCCCCGAAGTTCAAAATCTAAGGGGATTGAATGTCCATACCATG  
AGAATATGTGATTTTGGCCAGAAGTTCAAAATCTAACAGTGTTGAGAACCTGAAGTTCCAACAATTAA  
ATGGACAACCCCTTGAGGTATTATTGCAAATTGTGGTACGCCACATATCTCTTTGGCATAAGAGAATGAT  
GAATTGAGGCTCCTTACATATTTTGTATATTTGGGCCGGAAGCTCATGAACCCAAATATATGAGATATTA  
GCGTGCTTTTACTCAATTCATATTTTCATGTCCATTTTGAAAAGGGCAAATAAATTCTGAGTTTATGTTT  
AGCCCATGCCAAAAGTTCCGGGCTTCCATACGTTGAAATATGAAATTTGGGACAGTCGATGTGGTTATT  
TGAACCTATAAGGCACAAGGTTCCAAACCGTCATTTTGAAAAGACGTAAAAACCACAGGTGCAAATTT  
TAAGAATGTGCGCAATTATTATAAAAGGAAAGGAGCAAGTTGAAACGCAGTTGCTCCAATCAAGTTTT  
GCAAAGGCCATATCTATAGGAGGAAATATGGCTACAGTTTCCAGGATCCCAATATTATCTCAGATCCCCA  
TATTATCTTTTTCTTTCCAGATTCTAAAAACTTCACGTGGCCTCCATTAAATGTTTGTGGCACTTTTCG  
GCGTTTTCAAGTATTATTTTCATCAAAAGCCGATCTTGCTTTACGGATTTACGGAGCTACTTTTTCAAA  
AGTACCCCGAGAATCTCGCAATTTTCTATGGTTAATTTGAAATTCACCGATTTTACCTATTCATCTTATT  
TGTGTATAAATGTGTTACTAACGAAATTTCTTTGCAGAAGACATCCAGTTTTCTCCATACCTAGTGATG  
CGATATCTACTTGTTTTTCTTATCAGTGAGCACGCAGTGATGCAATATCTACTTATTTTCCTTATCAGTGA

GCACTTAATATGCCCCGAGAAGCAAGACTATCTCTGATCATCAATTGAG

>BGI\_novel\_G000254, Pp02:11721719-11726435 +

CACAATATCAATATTGACATGTCAAAGGATTGTCCATTTCGGGACTTCAATCCACATCATTGCTACGCAA  
CAGGCGTGCATCATATTGATCACTGCTATACCCATATTCTGTTCTTATGGGACTTTAATCTGTGCAGTGTA  
TTATCAATGTATCCAACTTACAATCTGTAAATTTGCATTAAATAATTCATGGATACATACAAGCCATTCTG  
TTGGAACAGACTTATCTCCCCATTTGGTTACCTTGCAAGATAAAATATCAAATAGGTATATAAGCATAAA  
ATAACACAAGTATTGCTTACATCCTTAGGTGGGAGAACTTTTTCTCAAGTATCATTCAAGCGCGTATCG  
GCCCAGTAAAAATATCGCTTGATGATCTTGTTATATCCTGCAAGAGCAAAAATCACAATTCTTTTCTCTG  
TCAAAAACAAATAACTCTCAGAGTTAGGATCACTAAGTATAGAGAAAATGGATGTCTTCTGCAAGA  
AAATTTTCGTTAGTAACACATTTATACACAAATACAATGAATAGGTAGAACCGGTGAATTTCAAATTAAC  
CATAGGAAAATTGCGAGATTCTCGGGATACTTTTGAAAAAGTAGCTCCGTGAAATCCGTAAAGCAAGA  
TCGGCTTTGAAAAATAACTTGAAAACGCCGAAAGTGCCGACAGGCATTATTAGAGGCCACGTGAAGT  
TTTGGACTCTAGGAAAGAAAAAGATAATATGGGGATTTCGAGAAGATATTGGGGTCTGAAAAACAGTA  
GCCATATTTCTCCTATAGATATGGCCGTTGCAAACTTGATTGGAGCAACTGCGTTTCAACTCAAATTT  
CTTCATTTTCTGAAACTTTAGTTTTCTTAAGACTTTCTTCGAAACCTTCTCAAAAATGGCTTCCTCTTCT  
TCCTGCCCCAATTATTTCAATTTAAATGATGCTCCAACAGCAACCAGTGACGCCAAAGTTTGGCATCCA  
TCCTTTGTATCCCAAAATCGTCATCTCACAGTTAATGATTCTGTGATGATGAATGATGCTACTGCTGTCA  
TAGTAGCTAGGAATTTCACTCACTCCAATGGATGAAATGCTGTAAACAGGGAGGTCTGAGGAAGAGGCT  
ATTGATGACTCAATGGCTTTTAGCATTCAGAGTGCTGCTTCTGTTTCTAACATGGCTGATCGTTTGCGTA  
CTAGAGCAAACGAGGTTGAGAAGCTGACAACCTGAAAATTCGTCTCTTCAAAGAATGCTTCATGAGTCT  
CAACAGGAGGTTGAGAACTTAAAGGAGAGAATAATTCCTTGTTGAACTGGTGAGTTCGTACTCAG  
TTGATACACTGAGAAGGCTAGACATGCTGCAGGTCTCCAATGAAAGGATTTTGGGAGACCACGAGAA  
GCTCATGGCTAAGCTTAAGAGGCGCCGCTCTTCTCCTTCAGAGGCTTCTAGAACATAATGGATTTTTAT  
AGATTTTACAGGGCTGCACCTTGATTGCAGGTGGAAAAATCTATCTGTTATATGTTCTGTAAATAATA  
TAGCGCACATTCTAAACTTGACCTGTGGTTTTTACGTCTTTTCAAATGACGGTTTGAACTTGTG  
CCTTATAGGTTCAAATAACCACATCAAATCTCTCAAATTACATATTTCCATGCATGTGAGCCCGAACTT  
TTGGCCTGGGCACAACTCAGAATTGATTGGCCCTTTTCAAATGAAATATGAATTGAGTAAAGCCATG  
ATAATATCGCAATATAGTAGTGAAGAGCATTAACACTATATACCCACAACCTCAAGTTCAGGATCTCTC  
ATATATTTGGATCCATGGGCTTCCGGCCCAGATAATAAAATATGTGGGGAGCCTCAATTCATTATTTGA  
GGTTTATATTGATATTATCCATTTTCGCGGTGATTCTTAAACAACCGGAATTCACAAAGTATATTTCTTCT  
TGAGGTGTGATTATAACAAAATCGAACTTTATTAAATTCATCATCTTCTTATGCCAAAGAAATATGTGG  
CATACCACAATTTGCAATAATACCTCAAGGGTTGTCCATTTAATTGTTGGAACCTCAGGTTCTCAACACT  
GTTAAATTTTGAACCTCAGGCCAAAATCAGATATTCTCATGGTATGGACATTTTACAATTTTCTGTACAT  
ATGTCTGGACTTCAAGCCCTTACATAATTGTCCATATTTTGAGGAACTTCTGGCATCTCATTTAATTGCT  
CATCCATGAGTTTAAGGAACTGCAGGTTCCCTTTTTGAATATAGTGACGATTTACCCAAAATGGTTAATA  
TTTATGTATACGTCACTATTTCATGTGAATAGTACTATTTCATCAAGTCATGAATACGTATCTATTTCATCTGCC  
AGTACAGTTATCATCCATGTGTACGGCATTATGAACCAATACGGTACTGTTACATCATTAAGGAACTCCA  
GGTTCTTATTTACATGTCAGGGATCAAGGACCCTCAAGTCCGATCACATGTTTACAAATACAGTACCGG  
AGAGACTGCCAGCTCTCATTTAATATCATCATCAAGGATCTTCAAGTCCTGATATAAATTGTATGATGA  
GGATCAAGGAACTTCTGGTCCTGATCTGCATACTGTAAAAACTCATCATAACAGCACAAATTAATCCATAA  
AATAAATTACTGGTAAATAAATTACTGGTATGGACGATAAACCCGCACCATACTTTAAATAAAAGTAAAT  
GTGCAGTAAAGTAAATTCATAAAGTATGAGGGTCAATTCTCATCATACTTTAAGGAAAAGGTAAATTTG  
CGATAAAGTAAAGGCAATTATTGGTGGGTTCTTATCAACACCACGATCAAATAATATATATGATGTCATC

TTTAATTTATGAATTTAATTTACCGCACATTTACATTTATTTAAAAGGGTGGTGCGGGTTTATCGTCCACG

CCTTTACTTTTATTTAAATGTATGGAGCAGAATTAATGCCCATACAAGCACCTTAACTTTATGAATTTAAT  
TTACCGCACATTTACATTTATTTAAAGTGTGATGCGGGTTTATCGTCCATACCAGTAATTTATTTACCAGC  
AATTTATTTTATGGATTAAATGTGCTGTATGATGAGTTTTTACAGTATGCAGATCAGGACCAGAAGTTCC  
TTGATCCTCATCATACAATTACATCAGGACTTGAAGATCCTTGATGATGATGTTAATATGAGAGCTGGCA  
GTCTCTCCGGTACTATATTTGTAAACA

>BGI\_novel\_G000425, Pp03:19835059-19837089 -

CCTCTGTGTCAGTGTCCCATATGGATTACAAGGCTAAAGGGGTTTCTAGTTCTATGAGAATTAGGATTAA  
AAAGTTCTATAGCAATAAGGATACCTCAAGGAGTCTCTTGATGGGCAAGACTCCTTGAGTGATGCATAT  
AAATAGAACAGCTCCCTCTAAGAGCCGATACACACAAAATCTCATCAAGTGATTACCCCATCTGGAA  
TCTGAGAATAAGGCATTCGGTGATCTTAGAGAAGAGCTGTCTCCAGGTGTTTGACAAAAGGCTTCAA  
TGGCAGAACAAAGGTTAGTGTTCAAGTTATTATAACTTATTAAGTTTACATGTGGTATCAGAGCGTAAGTT  
ATTTTATCTTCTACCCAACCAATTTTGTTGCAGCATTTAGAACTTGAAAATTGAAGGATAATTAAAGTTT  
TCAAGGTTAAAGAACTTGTTACAGCAAGAGTTAAAGTTAACACCTTGCTGTGACAAAACAGAAATT  
GATCAAAGTTTGTATAGTTCTTGCCGTGCTCTGAGCAAGCCAAAGCAACTCAGACACAACAAGATCTG  
TACATTCAAAGTTTATGATCAAACCTTGTTGTTGAAAATAAAGGCATAATGAATGATTCAGTGTCCAAAG  
ATGTGAATGATTTATCGTGCAATTATTTTCAGCAGAACAGCATAAGAGATGAAACATGTAGGCTATCAA  
GATTGTTCTTCTGTCCAAAGATGTGGAACTTTTCTGTACAGGAAGCTTATGTGATTTTCATATCTTAGT  
GTTGATGAACATGTTTTGATTTCTTCACCTAAAGGTGAGAATTGATCATGTTTTAAAGATTCTGGGGTTT  
TTCAGTTTTAAACACATATATATATATATATCTATGTGTTTTTCAGTTAATCACAACCTCGATTGAACTCTCAT  
TGGCTCCAACCTACACCAATGGAGGGAAGATGTGGAATTGCTCTAGGATTGCTGGATTATGAGATGG  
TCATTGAAGAAGAAGCTCCTGCAGAACCTGCTGCTACTGCATCTGCTGAAGCAAAAGCAAAATATGCA  
AAATGGATTAAAGCCAACAAGATGGCTATTCTAATCATGAGGAGATCAATTTACCATCTGTCAGAGGA  
AGCATCACACCATCTGATAATGCCAAGAAGTTCATTGATTCTATTGCGGAAAAATTTAGGAATCCAAG  
AAAGCTGAAATTGGTACTCTGATGGCACAACCTACTGATGCAAAATACAATGGGGAGAAGTGTGTAAG  
AACACACATATTGAATATGCTGGAATTGGGAACAAGCTGCAAGCACTCAAAGTCAATGTGGATGAAA  
ATATGATGGTACACTTGTCAATAAATTCTCTACCAAGCACTTCAAGCACCTTAGAAGCACCTATGTAG  
CACAGAAGGAAATATGGACAGTAACTGACCTCATAGGCATCTGTGTGCAGGAAGAACAAAATATGAA  
GAAAGATAAGGCTGAAGAAAGAGTTAACATGGTTCACAACCTCAAACCCAAAAAGGATTTTGAAAG  
GGTAAATTTGCTTGGAAGAAAAACAAGGAAGAAAAGGGGAAGTAAGGGGCTAGAACCAGAAGGTTTC  
AAGTGTTACTTCTGCAAGAAATTTGGTCATATGAAGAGGAATTGTGACAGATACAAACGCTGGCTAGA  
TAAACAGAAGGCTAAAGGGGTTCAAAACAAAGAGGCTGCCAAGCAAGGCTGAGATGAAGGTGTTTCG  
TGGGAAATGGAGAAAGAGTCAAGGTGGAGTACATTGGATTAGCTAAGATCGTTTTGGAGTCTGGTTTT  
ATTTTGGAGTTAGTAGATGTAGTTTATATTCCTTTTATGAAAAGGAATCTTATTTAGTTAGTAAGCGTGT  
AAAATCAAACCTACAGTTTGAGTTTGATGAGTCTGGATTCTCCATTTTCAGAAATAAAGTTATGATTGG  
TA

>BGI\_novel\_G000503, Pp04:17638321-17641467 +

AGAAAAGAAAGAAAGGGGAGAAGAGAAAAAGAAGAGAGAAGAAGAAGAGAAAAGAAGAAAGAA  
AAGAAGAGAAAAGAAGAAAGAAAAAGAGAGAAGAAGAAGAGAGAGAAAATTCAGTGAGCCTCACA  
TATTGTAACTCTAAAGTTGTAGCCCTATTATTTTATATAGTAAAAAGTTACTGCTGCTGCTCTCCGAG  
GACGTATGCATAGCCGAACCTCGTTAAATGCTGTGTCTCATCTACTTACGTGCAGCTCAATATTCATACA  
TATTCAGGTTATTTTATAACACGTTATCAGCACGAGAAGCTCTCAGGTATAATTTTTGTGCTGCACTAT  
TATCTATACTACTAACCCTAACAAAAATGGACCCTTGGTAATACTAAACATATTATCAGTGGGAGACCG



TTACTAATACTAACTTTTTCTTATTTTATTCGGTGGTGATTTTAACCCACATTTATTTACTGTATGGTGTA  
GGTTTATTACCCATACATGCACCTTTACTTTATCACAAATTTATTTTACCGCATATTTATTTTATTTACTGTA  
TGGTGTAGGTTTATTACCCATACAACAGTATTATTTAAAAGGGTGGTGCGGGTTATCGTCCACGCCTT  
TGCTTTTATTTAAATGTATGGAGCAGAATTAATGCCATACAAGCACCTTAACTTTATGAATTTAATTTAC  
CGCACATTTACATTTATTTAAAGTGTGGTGCGGGTTTATCGTCCATACCAGTAATTTATTTATCAGCAATT  
TATTTTATGGATTAATTGTGCTGTATGATGAGTTTTTCCAGTATGCAGATCAGGACCAGAAGTTCCTTGA  
TCCTCATCATACAATTACATCAGGACTTGAAGATCCTTGATGATGATATTTAAATGAGAGCTGGCAGTCT  
CACCGGTACTGTATTTGTAAACATGTGATTGGACTTAAAGGTCCTTGATCCCTGACATGTAAATAAGGA  
CCTAGAGTTCCTTAATGATGTAACAGTACCGTATTGGTTCATAGTGCCGTACATATTGATGATAACTGTA  
CTGGCAGATGAATAGATACGTATTCATGACTTGATGAATAGTACTATTACATGAATAGTGACGTATGCA  
TAAATATTAACCATTTTGGGTAAACCGTCACTATATACAAAAGGGAACCTGCAGTTCCTTAAACTCATG  
GATGAGCAATTAAATGAGATGCCAGAAGTTCCTCAAAATATGGACAATTATGTAAGGGCTTGAAGTCCC  
GAAATATGTACAGAAAATTGTAAAAATGTCCATACCATGAGAATATGTGGCTTTGGCCTGAAGTCCAA  
ATTTAACAGTGTGAGAACCTGAAGTTCACAATTAATGGACAACCCTTGAGGTATTATTGCAAATT  
GTGGTATGCCACATATTTCTTTGGCATAAGAAGATGATGAATTAATAAAGTTTCGATTTTGTATAATCGA  
CACCTCAAGGAAGAAATATATTTTGTGAATTCGGGTGTGAAGAATACACCGCGAAATGGATAATATTA  
ATATAAACCTCAAATAATGAATTGAGACTCCCCACATATTTTGTATATCTGGGCCGGAAGCCCATGGAT  
CCAAATATATGAGAGATCCTAACTTGAAGTTGTGGGTATATAGTAGTTAATGCTGTTCACTACTATATTG  
CGATATTATCATGGCTTTTACTCAATTCATATTTTCATGTCCATTTGAAAAGGGCAAATAAATTCTGAGTTT  
GTGCCCAGGCCATAAGTTCCGGGCTACCATACGTTGAAATATGAAATTTGGGAGAGTCGATGTGGTTAT  
TTGAACCTATAAGGCACAAGGTTCCAAATCGTCATTTTGAAAAGACGTAAAAACCACAGGTGCAAGTT  
TAAGAATATGCGCAATTATTATAACAGGAACATATAACAGATAGATTTTCCACCTGCAATGAAGGTGCA  
GGCCCTGTGAAATCTATAAAAAATTACATTATGTTCTGGAAGCCTCTGCAGGAAGATGACGGCGCCTCT  
TAAGCTTAGCCATGAGCTTCTCGTGGTCTCCCAAAATTCTTTCATTGGAGACCTGCAGCATGTCTAGCC  
TTCTCAGTGTATCAACAGAGTACGAACTCACCAGTTTCAACAAGGCATTATTCTCTCCTTTAAGTTTCT  
CAACCTCCTGTTGAGACTCATGAAGCATTCTTTGGAGAGACGAATTTTCAGTTGTAAATTCTCAACTT  
CGTTTGCTCTGGCACGCAAACGATCAGCCATGTTAGAAACAGAAGCAGCACTCTGAATGCTAAAAGC  
CATTGAGTCATCAATAGCCTCTTCTCTGATCTCCCTGTCAACAACATTTTCATCCATTGGAGTAATGAAA  
TTCCTAGCTACTATGACAGCAGTAGCATCATTCATCATCACAGAATCATTAATGTGAGATGACGATTTT  
TGGATACAAAGGATGGACGCCAAACTTGGGCATCACTGGTTGTTGTGGGAGCATCATTTAAATTGAAA  
TAATTTGGGCAGGAAGAAGAGGAAGCCATTTTTTTAAGAAGGTTTGAAGAAAGTCTTAGAAAACT  
AAAGGTTTCGAAAATGAAGGAAATTGAGTTGAAACGCAGTTTGCAAAGGCAATATCTATAGACGAAA  
ATGTGGCAACTTTTCAGGACCCCAATGTCTTCTCGAATCCCCATATTATCTTTTTCTTTCCAGAGTCCA  
AAACTTCACGTGGCCTCTAATAATGCCTGTGGCAGTTTCGGCGTTTTTCAAAGTATTATTTCAAAGC  
CGATCTTGCTTTACGGATTTACGGAACACTACTTTTTCAAAGATATCCCGAGAATCTCGCAATTTTCTAT  
GGTTAATTTGAAATTCACCGGTTCTACCTATTCATTGTATTTGTGTATAAATGTGTTACTAACGAAATTTT  
CTTTGCAAACGACATCCAGTTTCTCCATACCTAGTGATGCGATATCTACTTGTTTTTCTTATCAGTGAA  
CACTTAATATGCCTGAGAAGCAAGACTATCTCTGATCATCCATTGAGGAAGCAAGACTATCCCTGATCA  
CGTTTCCACTACATCAGGAAACTGTGAAGGCGATCTTATGCTCTAATCTCCGGAAGTCCTTCTAGACTA  
GGAGATATGAGAGCTTATTGTCTG

>BGI\_novel\_G000659, Pp06:13132808-13133357 .

GCTAGGAACCAAGGAATCTCTGGTCTTTGAGTTCCAAGAATTCCTTTCTTTCCATGAA  
ATTTCCATCAAATACAAGACATGGGACAAAGAGGGAATTGCTTATCTTTGTGAGCTTTGAATTCTCAA

ACTTGGAATTGTACCTCCCTATTGTCTTTGCTTGTGGTTTTCTTTGAATATGGTCCAAAGAAAGGTACC  
AAGCAAGCTTGGAATCCAAGCTGATCATGTTAAATTTGAGAAGCGGTTGGCAAACCTGAAAACATCTT  
CTCAGTTCCAGGATGGCAAACATAGGGGAGCTGATTTGAAGGAAAAAAAAAATGAAGAAATCTAGAT  
CAATCAAGCTTTCAGATATTGAGAGCTTGAGATCATCACCTTTGAGAAAGAACATATCCCAACCAGGA  
AAGCCACCACCACCATCTCTCAATGTTCCAAACACTGCAGCTTTTCCTCAGAAGCAGCCTATGAACAA  
AACAACTTATGGCTCACCAAACTATATGAAGCCCACCAGCTGTTCTGATGCAAGGAAGGAGCAATCCC  
AGA

>BGI\_novel\_G000750, Pp07:1984294-1989082 +

GCTTTTCAAACGTGATCAATCAAAGAAAAACATACATCAAGGATATATTATTTTAGTGAATGAGAATTC  
ATCAATAATATCTAGAAATTCATACACTCAAACATCAAATAATAGAGTATTCATGTTAGGGCTTCAAC  
CTAAGCCCTAGCTATGGAGTTTAGTTCTCTACTTATTTCAAACACAAATTCGAAATAAACTAGAAAG  
GGTTTACAGATTTTGTGAAAGTGATGGAAGCTCAAGGTCTTCAATGGTGGAAACCTTCTTCTCCTTCTT  
GCTTGGCTGCCCTTGTCTTCTCCTCTAGCTCTCTAGCTCCAAAATCTCCTCCAATCTCTGCAAAATTGA  
ATAATCCGTTCAAATGTGGTTGATGCCTTCTCTATGCTCCCCCTCTCTCTCCTCCTTTCCAATTCACCCAT  
CAATATTAAACTCATTTGTTGTAAGTGAGTGAGTCCCCAAAATGCCCCCTAAATGCCTATAAATAGGGCT  
TCCCTTACTTGTAAGAACACACATTCAGAACACATATTAGAATGTGAAATCAGTTTCCATTCCCTTCTCT  
CTCTCCCAATTTCTCTCCATAATCTCTTAGTTTTACAACACGTTATCAGCACGAGTCTTTAACCGGCTG  
AGTTCTGTGATGAAACCCATTTAGATAAAACACAGCAGCAAGCAACAAATATCAAAATCACATCACC  
AGCTCTGATCAGTATTTCAGAATCTCTGATTTCTTGATCCCAGAAATTGATCAAGACACCCAGTTCGAA  
ACCAAGCCCCAGATTGCTCACCCAAAACCAACCCAGTTTTGTACAGAGCCACACGGATTGCTTGCCA  
GTGTCCTGCCATGCCACCACAGTGAGGCCCTCGACAGCAAAAGCGCCAAGCGCACCCAAACAAAGAG  
ACCAAAGGGCATGATCAATTCATAGTTCTGGAGATAGAAAATATGATATCTGAAAAAAAAAAAAAAAA  
AAAAAAGAACCAGACAGTTTCATCTTTGGGTAAAATCGATTCTTGGCTAACTGGCATGGCTATGCTTCT  
TAAGGCTTGCGTGCTTCTCTCACACAAGCTTCTACTGCTCACCATAAGCACTTCCTGGCTCCATCTGC  
ATTCAACTTCAGCACATCAGGAGCGGCAGGAGACCTTTGAGCTGGCTGTTGCTGAGGTCCAGGGCCG  
TATTGAAGGCAACGTCGACTAGCCATCCAAGGGCTTAAGCCTCATCGCATTATCACACTTCTCACCAGC  
AAAAGAGAAGCAAAAGCCAAAACGAAACAGAGGAAGCAAAATCCACTTTTTTTGTCTGATCGATCAG  
CCATCAATGGCCGCGAAGAATTCAAGCACGTCATCCTCGGCGGTGGAGTCTCAGCTAGATATGCAGC  
TCGGGAGTTTGCCAAACAAGGGCTTATCTCTCCCCGAGTCTCCTGCTAGACTTCCTGGGTTTCATGTT  
TGTGTTGGAAGTGAGGAGAGAGATTGCTTCCCGAGTGGTACAAAGAGAAAGTTTGGCAGGGTCTGG  
TGTCCAGAACATGAGTCAAACGACGTCGTCGGTTGGGAGCTCGAAGATACTAAGGCTGTTTGGGGTG  
ATCTTGAGGTGCCAGCAGCAGGCTGACCACGAGTCCCAGCCATCCATCCACTCCCGATGGCTCGTCGT  
CTTTGTCCATGTCATCGAGCCAGGGTCCAACCCACACCTGACTCGGGTTGCAGCGGTACACGAGAT  
TTGTGAATTTGGACCGGTGGCTCGCCCTCCAGCTCCTCCCCACTGTCAAGATTGGTTTGCTTCAGCTTC  
TGGAGGAGATTCTCCTCCATTATTTTGCATACCCATCTTTTCTTGTGAGTGGAGACTGCAACAAGCTTT  
ACCAATTTGTTAAGGAACAAACAGAGATGCTGACTTAAGTCTAATGGCGGGCCACGCGATAAACACAA  
GTTGGCTGGACTGCACATGTTGTCGAGTGCGCATGATTACAGCCCCACCCACCGAAACATTAAAAAAA  
ATAATGGCATAAGCGAAAGAATAAGCGATAAGATCTCTGCTCCCTTATCTTCTCTATTATTTTCATATTAT  
TTATCTGCTTACTTTTACTAACCATTAAACAAAAATGGACCCCTGGTAATACTAAACATATTATCAGTGG  
GAGACCATTACTAATATTAACATTTTCTTATTTTATTCGGTGGTGGTTTAAACCCACATTTATTTTATTT  
ACTGTATGGTGTAGGTTTATTACCCATATAACAGTATTTATTTAAAAGGGTGGTGCGGGTTTATCGTCCA  
CGCCTTTACTTTTATTTAAATGTATGGAGCAGAATTAGTGCTCATACAAGCACGTTTACTTTACCGCAAA  
TTTACTTTTTCTTAAAGTATGACGAGGAATTGAACCTCATACTTTATGAAATTTACTTTATGAAATTTACT

TTACCGCACATTTATTTTATTTACTGTATGGTGTAGGTTTATTACCCATACAACAGTATTTATTTAAAAGG  
GTGGTGCGGGTTTATCGTCCACGCCTTTACTTTTCATTTAAATGTATGGAGCAGAATTAGTGCCAATACAA  
GCACAATTTACTTTACCGCACATTTAATTTTATTTAAGGTATGGTGCGGGATTAACGTCCATACAGCAAG  
CAATTTAATTTACCGCACATTTACATTTATTTAAAAGGGTGGTGCGGGTTTATCGTCCACGCCTTTACTT  
TTATTTAAATGTATGGTGCGGGTTTATCGTCCATACCAGTAATTTATTTACCAGCAATTTATTTTATGGATT  
AAATGTGCTGTATGATGAGTTTTTACAGTAAGCAGATCAGGACCAGAAGTTCCTTGATCCTCATCATAC  
AATTACATCAGGACTTGAAGATCCTTGATGATGATATTAATATGAGAGCTGGCAGTCTCTCCGGTACTGT  
ATTTGTAAACATGTGATCGGACTTAAGGGTCCTTGATCCCTGAGATGTAAATAAGGACCTAGAGTTTCCT  
TAATGATGTAACAGTACCGTATTGGTTCATAGTGCCGTACACATTGATGATAACTGTACTGGCAGATGAA  
TAGATACGTATTCATGACTTGATGAATAGTACTATTTCACATGAATAGTGACGTATGCATAAATATGAACCA  
TTTTGGGTAAACCGTCACTATATACAAAAGGGAACCTGCAGTTCCCTTAAACTCATGGATGAGCAATTAA  
ATGAGATGCCAGAAGTTCCTCCAAATATGGACAATTATGTAAGGGCTTGAAGTCCCGAAATATGTACAG  
AAAATTAATAAATGTCCATACCATGAGAATATGTGGCTTTGGCCTGAAGTTCAAAATTTAACAGTGTT  
GAGAACCTGAAGTTCCAACAATTAATGGACAACCTTGAGGTATTATTGCAAATTGTGGTACGCCAC  
ATATCTCTTTGGCATAAGAGAATGATGAATTGAGGCTCCCCACATATTTGTTATATTTGGGCCGGAAGC  
TCATGAACCCAAATATATGAGATATTAGCGTGACTTTTACTCAATTCATATTTTCATGTCCATTTTGAAAAG  
GGCAAATAAATTCTGAGTTTGTGCCTTGGCCAAAAGTTCGGGGCTACCATGCAATTTGGGAGAATCAA  
TGTGGTTATTTGAACCTATAAGGCACAAGGTTCCAAACCGTCATTTTGAAAAGACGTAAAAAACCACA  
GGTGCAAATTTTAAGAATGTGCGCAATTATTATAACAGGAAAGGAGCAAGTTGAAACGCAGTTGCTCC  
AATCAAGTTTGTCAAAGGCCATATCTATAGGAGGAAATATGCCTACAGTTTCCAGGATCCCAATATTATC  
TCAGATCCCCATATTATCTTTTCTTTCTTAGAGTCCAAAACCTTCACATGGCCTCTGATAATGCATGTCG  
GCACTTTCGGCGTTTTCAAGTATTATTTTGTCAAAAGCCGATCTTGCTTTGTGGATTTCACGGAGCTAC  
TTTTTCAAAGTATCCCGAGAATCTCGCAATTTTCCTATGGTTAATTTGAAATTCAGTGGTTCTACCTATT  
CATTGTATTTGTGTATAAATGTGTTACTAACGAAATTTTCTTTCGAGAAGACATCCAGTTCTCTCCATAC  
CTAGTGATGCGATATCTACTTGTTTTCTTATCAGTGAGCACTTAATATGCCCCGAGAAGCAAGACTATCT  
CTGATCATCCATTCAGGAAGCGAGACTATCCCTGATCACGTTTCCGCCACATCAGGGAAGTGTGAAGG  
CGACCTTATGCTCTAATCTCCGGAAGTTCTTCTAGACTAGGATAAATGAGAGCTGGTTGTTTGCTCCCA  
CCAGCTTCCTTCCTTGATTGCTGAGCTTGTTGTCTGCTCCCACCAGCTTCCTTCCTTGATTGCTTACCTT  
CTCTTGCAATCAATATCACATTATTTTGCATTATTTCTCTTTTATAACTCTCTGTTTCATAAGGGATTTTA  
TTTCTTTAGAATGAACATCTGAAGAATGAATCCATGCAGTGATCCTAACTCTGAGAGTTATTTGTTTTTG  
ACAGAGAAAAGAATTGTGATTTTGTCTTGCAGGATATAACAAGATCATCAAGCGATACTTTATATTTA  
CTGGGCCGATACGAGCTTGAATGATACTTGAGAAAAGTTTCTCCACCTAAGGATGTAAGCAATACTTG  
TGTTATTTTATGCTTATATACCTATTTGATATTTTATCTTGAAAAGGTAACCAAATGGGAAGATAAGTCCGT  
TCCAAAAGAATGGCTTGATGTATCCATGAATTATTAATGCAAATTTACAGATTGCAAGTTGGATACAT  
TGATA

>BGI\_novel\_G000830, Pp07:19265483-19265795 +

TTTCATGGTTCTCTTCCTTCCTGGCTCTGCTAGTCTCACCCGCACAAGCAGACACCTGCACCTCACAGG  
TATTCATTAACAGCAATCTCTACTCCAGCTGCACCGACCTCCCCGTCCTCAGCTCCTACCTCCACTGGA  
CCTACGATACCTCCAACCTCTCTGTCCATCGCCTTCATCTCTACACCCCCCAATCTGACGGCTGGG  
TAGCGTGGGGCATCAACCCACCTCCACCAAGATGGCTGGGGCACAGATACTCTTGGCCTACAACACA  
GATAGTGGGATCCCAACCGTCAAAACCTTCAACATCAG

BGI\_novel\_G000853, Pp08:3842056-3842798 .

TACAGCAAGCAATTTAATTTATGAATTTAATTTACCGCACATTTAATTTTATTTAAGGTATGGTGCGGGAT  
TAACGTCCATACAGCAAGCAATTTAATTTATGAATTTATTTTACCGCACATTTACATTTATTTAAAGTATG  
GTGCGGGTTTATCGTCCATACCAGTAATTTATTTACCAGCAATTTATTTTATGGATTAATTGTGCTGTATG  
ATGAGTTTTTACAGTATGCAGATCAAGACCAGAAGTTCCTTGATCCTCATCATACAATTACATCAGGAC  
TTGAAGATCCTTGATGATGATTAATATGAGAGCTGGCAGTCTCTCCGGTACTGTATTTGTAAACATGT  
GATTGGACTTAAGGGTCCTTGATCCCTGACATGTAAATAAGGACCTAGAGTTCCCTTAATGATGTAACAG  
TACCATATTGGTTCATAGTGCCGTACACATGGATGATAACTGTACTGGCAGATGTACTGTACACATGAAT  
AGATACGTATTCATGACTTGATGAATAGTACTATTACATGAATAGTGACGTATGCATAAATATTAACCAT  
TTTGGGTAAACCGTCACTATATACAAAAGGGAACCTGCAGTTCCTTAAACTCATGGATGAGCAATTAAA  
TGAGATGCCAGAAGTTCCTCAAGATATGGACAATTATGTCAGGGCTTGAAGTCCCGAAATATGTACAA  
AAAATTGTAAAAATGTCCATACCATGAGAATATGTGGCTTTGGC

>BGI\_novel\_G000906, Pp08:14722502-14725198 +

GGAGCCCACAAGTTAGAAATAGGTTTTGCCTATAAAAGGAGTGATCCCTCTCCATTGTAACACAGACAG  
AAACATTCAATAAGATAACAAAACATTCTCTTCATTCTCTCTCTCAATTCGCTCTACATTTATAACACG  
TTATCAGCACGAATTCGCTAAAACAATACCAGCTGAATTCTCTGATGAAAACCAAAGTTTCTCCCTTGA  
ATTTCTTTCTGGGTTCTCTGTTTTCTATATGCAAAGCAGCAACACCTAAAACCAGAAAAAGAAAGA  
CGAAAACCTCTCTCTGCCACCCCTTGAAATTCACAGATATCTGTTTTATCAAACATCAAAGACCTTT  
TGGTCCCAAGTCAATATCATCAACCTCAGATCCAATTGAATCAAAAAAAAAAAAAAAAAAAAAAAAAA  
AAAACCAACCTTTTCTGTGTTCTGTGGACTGTTTTTCTCTGCTCTGGATTGCTTGGTCTGCCCAGTTT  
GGGTATTGTTAGAACAACAAGATCAGTGGCAAACCCATGTCCGGAATTCAGTTCAACTCATGCTTCA  
GCTGTTCTCAGATATGGAACATCTCTTAGAACAGCGACGTCGTCAACCCAGCGCAGCGCAGGCCCGCA  
TCGCCGAGAGGCCGCGCATGCGCCGTATGGCCGTGAGAGCGTCCCGGCCGACATCCAGGTGCTG  
CCCCACTTGACGTCCACGCCACGCACACCTCGTCCACGTCTGCTGGTTTACCAATCCAGCGAAAA  
GGTTTGAAGAGAGGCCAACTTCTTGGTGGTAAACACTTTGGTGCCACCAGTCGCTCAACAAAAGGA  
TCAGCTCACCGTCGTAGGACCTCATCAGTCTCCACAAGCCCACGGCTCGAACCAGGAAAGCCGACC  
CAACCAACAACAGCGGCGGCTGCAGACAACAACGGCGGCGTGTCCACATCATCAGCAACTGCAGG  
CATGGTGATGGTGGTGGTGCTACAGTGACAACACTGTCTCCTCAGATTTCTTTATTTGTTACAAGTA  
AGCTCTGAAGCCTAAGCCCAAGGAAGAGAGGGAGCTGACGCACCTGTACGAGCGTCGACAGTTCCCC  
TACAAGGGCGACGAAGAAGCCATGGAAAGAAGTCAGTGTTCTTGCGCTGCTATGCTCTTACCTGGCC  
GGAGAAAAGCGGAAAGAGGAAGAAATGATAGAACTTGAGGGGCCCCTAGGTAAGAGCGACGTTGTG  
AATGGTGAACTGGTTTCTCTAGAGAGGGAGTTATCAACCCTTCGCAAGAATGGGACCGTTGACCCTTT  
TGGACTAGGAGAAATGGTGATGGTGACGATGCAGAGGTCGGATCCGTGGGTGACGGCGTAGTTGACG  
TCGGCGATGATCTTGGTGAGGGGGAGGAAGGCTATGGAAGACAAGGTTATGGTTCATGAGGCTAAGG  
ATGCTCGGTTGCTTGAGTTGTATTGAGTGGTCAATGGCTGTGGTGAGAGAATATGCTGTGCGGTACGCA  
TGATCACAGCCCCACCCACGATATACTGTGCGGCACGCATGATCACAGTTGCTCAGCAACACAGGCA  
CCGAATATGCTGTGCGCTATCATGGGTTGTGCTATCTGTGTCACATGTAAAACCACCCACCGAAAATA  
AAGGGATAAGTACTCTGACTCACTCTATCTCCTTCAATTAAATACATTATTAATAACCTACAGAATTTA  
ATACTCATGATCAGTGATGATTGCAGGTGGAAAGAAGAGAAGCCAACGTGATATATCTAGCTTTCATA  
ATATATCAGTATAATAATATTATACTATTTGATCGTGGTGTGATAAGAACCCACCAATAATTGCCTTTACT  
TTATCGCAAATTTACTTTTACTTAAAGTATGATGAGGAATTAACCTCATACTTTATGAATTTAATTTACC  
GCACATTTACATTTATTTAAAGTGTGGTGCGGGTTTATCGTCCATACCAGTAATTTATTTACCAGCAATTT  
ATTTTATGGACTAAATGTGCTGTATGATGAGTTTTTACAATATGCAGATCAGGACCAGAAGTTCCTTGAT  
CCTCATCATACAATTATATCAGGACTTGAAGATCCTTGATGATGATGTTAATATGAGAGCTGGCAGTCTC

TCCGGTACTATATTTGTAAACATGTGATTGGACTTGAGGGTCCTTGATCCCTGACATGTAAATAAGGACC  
TGAGGTTCCCTTAATGATGTAACAGTACCGTATTGGCTCATAATGCCGTACACATGGATGATAACTGTACT  
GGCAAATGTACTGTACATATGAATAGTGCCGTATACATGAATAGTGATGTATACATAAATATTTACCATTT  
TGGGTAAACTATCACCATTCAAAAGGGAACCTGCAGTTCCTTAAACTCATGGATGAGCAATTAAATGA  
GATGCCAGAAGTTCCTCAAAATATGGACAATTATGTAAGGGCTTGAAGTCCAGAAATATGTACAGAAA  
ATTGTAAAAATGTCCATACCATGAGAATATGTGATTTTGGCCCGAAGTTCAAAATCTAAGGGGATTGAA  
TGTTCATACCATGAGAATATGTGATTTTGGCCAGAAGTTCAAAATCTAATAGTGTTGAGAACCTGAAGT  
TCCAACAATTAAATGGACAATCCTTGAGGTATTATTGCAAATTGTGGTACGCCACATATTTCTTTGGCAT  
AAGAGAATGATGAATTGAGG

> BGI\_novel\_G000473, Pp04:12563396-12565812 -

TCTATTTTCACGCTCTCTCTCCTCCTTCCTCACATCACGTTGCTTCTTCTCACATCTCTTCACAGAG  
CCCCTCCCCTCCTTCTCTTCAATTCCTGCCTACAGTAGTTTTTCTTGTGGATCAATTGAAGCGCATTG  
CTGAGCCACAAGACTCAGAAAGGGTATACCTACCCAAAATGTGATGGCTGCATGCAATTTATATTTGCA  
TGTGCCGGATGGGAAGGCACGGCCCATGACACAAGGATATTTCTATCGGCTTTACGTGATCAAAGTTT  
GAATTTTCTTAACTTCCAAATGGAATTTTATCTAGTAGATGCGGGATACCCACAAATGAGAGGCTA  
CTTAGGACCATATAAAGGTGAAAGATATCATCATCTCCTGATTTTCGTAGGGGTGTTCAACCAATGGG  
TCATAAAGAGGTATTCAATCATACACACTCTTCTCTGAGAAGTGTTATTGAACGCACTTTTGGAGTATG  
GAAAAAGAGATGGAGTATTTTACGCGACATGCCTAGTTATCCTTTTGCAAAACAAGTCAAAATAGTTAT  
TGCAACCATGACACTTCATAACTATATAAGAAGACATGCCAAACGTGATTGTCATTTTGATGAAAGTGA  
AGATGACCTAAATGGTACTCAAGATGAAGAGATTGAGAGAGAGGTTGATGCACAACAAGAAGATGGT  
CCTGTAACACAAGAAATGGAGGCATTGAGAAATCATATAACCGCAAGTTTAATGAGTTCATCTGGTTAG  
AAATGTATATGATTGCTTATTTATGACTAGTTTAATTTTGTATGACCATATTATTGACAATATATTTATTT  
TTAATTGAATACTTTATTTATTTTATAATTAATA

>BGI\_novel\_G000725, Pp06:27354244-27359524 +

ATGGAATTCACATGCTTGTAAGGTGTCATCCGCTCCAACAAGATCAAATTCATGCATATTATCTAAAA  
AGATGATGAAAGCCACAAGAAAAGGAAGAAAAAGAGAAAACAATTCAACAATGGAATTATGGGCAA  
CCACACCAACATAGACAAGATGAAGTGGGAGTTATGGATTGTATTAATAGGAATGGTGGTGTGGA  
ATTCATCATAATGTTCCCTCCCTCTTAGCCCTATAAACAGAGAAGTCTTCAAGCTTCAAAACACACACCA  
AGCTCACAATCTTCTCTTGAGCTCTCTCTCCTTCCCAATCTTCTAGTTCTAAATTTCTGTTTTAGTTT  
TATTTTTTGGGGAACCTAAGCTCCCTAGCTAAGGCTAAGGGGGAAGCTTTAATATGAGTATGTAATTTTA  
TTAATTTGATCCAACTTAAGCTTTAATGTGAATTTGTAGTTTTGTTCAAATGGAATTTGTAGTTTTCTT  
TTAATTAATGATGAATGTTTGATAATCTATTTTCATGGGTTCAATAATGATTTCCCATGTGTAGTAAAA  
ACTTTCATGCTTTTAAAAGATGAGACAATTACTAAGATAGATAGAATTTTCGATGAAGATTATTTTTTGAT  
AGTTTGTGCAATGGTACAAGTTATGCTTAGAATACTTCTAAAGGAAATTAATAATAGTTTAAATTATT  
TTGAACAACATAATGGAATGGATCAAATTAATAAGAGTTGCATGCTTATGTTAAAGCGGAACCCCA  
AAGCCTTAATGTTTAAATCAATTTAATTTTCTTTAAATCAAATCTTGCATAAATCTACTTCTCAATCTTAAT  
TGTTCTATCTCAACTCTGTTATTTCTTTACACTACTCTCTGTGGATACCACACTTGGACTTCCAACTA  
CACTGCTATACGACACCTTCACTTGGGTTTTGCAAAGTGGTACAAATCAATTGGCGCCGTTGTTCCGGG  
AGCGGCTTGTCAAAGAGTACAGAGATCCCTTGGTTGGAGGTTTGCTGCTTATGTGAAATTTCTTCACAT  
CCGGAAATGAAAGGAGCTTATGAGGAGCGTTGTGCTGCTATTGGAACTTCAACAATAGTATTCTCC  
TTTTTCCAACACTTATAATCCAGCAACAAGGAATCATCCAACTTTTGTGGAGCAATGAGTCACAACA  
TCAGAAGCAAAATCAAAGGTATGATACTTTGCTTGGTCAATTGGGTGAAGAGAATAGGGAAATTGGCA

GCTTTACCCCTGGCTCACCTAATTTATTCATAATATCCTTATTTTGAAACTCAATCACAAATGCCCTTA  
TAAAAACTCCTTATTGACAGCCTATTGCCCATCCTTCACTTCGTTTTTTTTCTTAGTTGTTGCTCTTCCT  
CTTCCCTTCCTTTTCTTCTTTTCTTCTTCTGCCAAACCTCACAAAATCCACTTCAACCATAGAATCT  
CCCTAAACTTTATCTCATCTTAGTTATATCTTCCAAGTAGGAGCTGATTTCAACCTCAAAGTTCAACCCC  
AAATTTGGACCGGACCCTAGCCAAGGCGCGACTCTCCACCTCCGTTGTCGGCCTCCACAACAAAGCC  
ATAGTCTTGACGTGCCACCTCCATTGTCGACTTCCACCACAAAGCCACGGCACCTTCCTTGTCGATCTT  
CACTGTGAAATGGACACAATTGCAATTTTGGTTTGCTACAATGGCAAATGGGTAACCTCAAAGAAGAT  
GTGCACATATGAAGGGGGTGAAGTCAAAAAGGCATAATAGTTTCGCAAAACATCACGTTTGGTGAGCTTT  
TGGAACGGGTGCATAAGATTGTTAATAGAGACAACAGGGAAGACAAGCTTTGTTTAAAGTTCTCAATT  
TCAATATCCTCGAATGAGTGTAAGCATATCAAGATTGAGGACAATGATGATGTTTAAATTTTTTATTAAG  
TACATTTGTGAAGTAATTCCTTCAAAAGTGGCTTCTTTACTGGTGAGCATAGAAGACAGAGGAGTGAC  
AAATGTTGTAGGTGATCGTATACATATCACGACGGATATGAGTTGGATGGCCTGTTCTTCAAATGCCATA  
GTTGAAAGCAATGGTGATGTACATGGTGATTTTGGAACAGAATATTTAGATCTGATTGATTTTAAAGG  
GTGGAGGGGATGCATAGTGGTGATAATGGTACGGAAATGAATGGCTTGCAAATGCACTCAGCCCATCC  
TATTTTGGCCCATTTGGAGACATTTTCACAAGTGGGTGTGAGGGGTTTTGGAATAACGTCTGAACTTTC  
TATTCGACATAATTAGAGGCAAATGGGTGAACAAAACGTTGACAATTTGGGTATTGTAAATGATGAAGA  
AGAAGATATTGAAAGTGCGCATTACGGAATAATGGGATCCAAAATTGGAAGTTGGGAAAATTTTCT  
CTAGTAAGGAAGCCCTGTCCAACAAGTTACAGTTGGTGGCTGTGAGAGGTCACCTTTGAATTTAAGGTG  
AAACAGTCTTGCAAGAGTTGATTAGTTGTGGTTTGTCTCAAGGCCCATGCCCATGACGGCTTCGTGC  
ATCTAGTTATGGAGAAAAGAACTTCACGATTGTGAAATATAATCCAGTTCATGAATGTGATATGAGTTTT  
ATACATGACAAGCATCGTCACGCAAGTGCTAAACTCGTTGGTAATGCAGTGAAGCAGAAGTTCAAAG  
ATTCTCGCACAAATATACACAGCAAGTGATATAATCAAAGATGTGAAACAAAACCTTTGGTGTCCCCATTA  
ATTATTGCAAAGCTTGGAGATCGAGGGAGTTAGCTCTAATATCCATTAGAGGTTCAAGTAGAGGAGGCAT  
ATTCTCTCCTTCCAGCTTATTGTCATGAATTAGAGCGTGTGAATTCAGCACAAGGACATACATCCACA  
CCGATGAGAACAATCACTTTTTGTATTTTTATGTTTGTGGGGCATGTATTAGAGGGTTTCAATCTTTG  
AAGCGGCTAGTCATTGCTGTGGATGCCACGCATTTAAATGTAAATATAAGGGTGTCTTTTTGTTGCC  
AATGCATTTGACGGAAATCGAAATATATATCCTCTTGCTTTTGGAAATTGGGGATTAGAGACGGATGCAT  
CATGGCATTGGTTTTTCAGTAAGCTTCATGAAGTCATTGGTGAGTGCCAAATCTTGTGATTATTTCTAA  
TCGGAATATTAGCATCGAGAATGTGTGGCATAACATTTTCCAAGGCGCAACATGGCATATGCTTTTACC  
ATATGAAGAGGAACATGAAACGCACCTTCAAATTGAAAAAACGTGATAAATTATTGCTACACTTTGA  
ACAAGTTTCAAATCTTATGGCATCGCTGAATTTGATCGTCATTTTCGCAAGATCAAGGGAAATGATGA  
GGTTGCTCAATATCTTGAAAGTGCAGGATTACACAAGTGGTCTAGAGCTCATAGGG

>BGI\_novel\_G000833, Pp07:20699156-20699568 -

ATATTTTCCAAGTTGAGAAATAGAGTGTTATGAAATGATGAAAGAAAGCATGCTGCATTTGAAGTCCTT  
GAATCACATCTCATTGGTGTGCAGATCAGTTGAGAAATCCCTTGATTTCTACCAGAGTGTCTTGGGTT  
CTTCCCAATTAGGAGTTCTGGCTCCTTTGACTTTAATGGTGCATGGCTATTCAATTATGGCATTGGCATA  
CATCTTCTCCAATCTGAAGACCCTGATACCCAAGAAGATCACCCAGATTAAACCCAAGGATAACCCAC
