# Supplementary material for: Transcriptomic Analysis Reveals Genes Associated with the Regulation of Peach Fruit Softening and Senescence during Storage
Source: MDPI journal article supplement (doi:10.3390/foods12081648), 2023-04-14
Supplement: s1 [file s1]

Supplementary file S1 Statistics of clean reads

| Sample | Total Clean Reads (M) | Total Clean Bases(Gb) | Genome mapping ratio (%) | Gene mapping ratio (%) | Clean Reads Q20(%) | Clean Reads Q30(%) |
|--------|-----------------------|-----------------------|--------------------------|------------------------|--------------------|--------------------|
| HJML1  | 69.7                  | 6.97                  | 96.35                    | 71.14                  | 97.9               | 90.96              |
| HJML2  | 67.07                 | 6.71                  | 96.47                    | 71.11                  | 97.8               | 90.7               |
| HJML3  | 69.47                 | 6.95                  | 96.46                    | 71.49                  | 97.85              | 90.88              |
| HJML4  | 66.82                 | 6.68                  | 95.32                    | 69.76                  | 97.79              | 90.69              |
| HJML5  | 66.31                 | 6.63                  | 95.06                    | 69.94                  | 97.84              | 90.82              |
| HJML6  | 69.43                 | 6.94                  | 95.26                    | 70.02                  | 97.78              | 90.65              |
| HJML7  | 67.12                 | 6.71                  | 85.49                    | 63.38                  | 97.92              | 91.11              |
| HJML8  | 68.57                 | 6.86                  | 84.89                    | 63.03                  | 97.94              | 91.13              |
| HJML9  | 67.32                 | 6.73                  | 85.27                    | 63.25                  | 97.92              | 91.06              |
| HY1    | 69.52                 | 6.95                  | 93.55                    | 69.9                   | 97.9               | 90.91              |
| HY2    | 71.82                 | 7.18                  | 93.22                    | 70.13                  | 97.9               | 90.94              |
| HY3    | 69.68                 | 6.97                  | 93.28                    | 69.63                  | 97.88              | 90.81              |
| HY4    | 71.85                 | 7.19                  | 95.97                    | 71.39                  | 97.86              | 90.81              |
| HY5    | 69.57                 | 6.96                  | 95.98                    | 71.28                  | 97.95              | 91.12              |
| HY6    | 66.99                 | 6.7                   | 96.08                    | 71.72                  | 97.88              | 90.87              |
| HY7    | 69.65                 | 6.96                  | 90.45                    | 67.67                  | 97.94              | 91.02              |
| HY8    | 67.1                  | 6.71                  | 90.31                    | 67.52                  | 97.88              | 90.89              |
| HY9    | 69.46                 | 6.95                  | 91.97                    | 68.7                   | 97.92              | 91.03              |
| XC1    | 69.49                 | 6.95                  | 96.09                    | 72.04                  | 97.79              | 90.66              |
| XC2    | 69.5                  | 6.95                  | 95.91                    | 71.97                  | 97.87              | 90.91              |
| XC3    | 67.29                 | 6.73                  | 95.95                    | 72.33                  | 97.9               | 90.98              |
| XC4    | 69.56                 | 6.96                  | 95.94                    | 71.01                  | 97.85              | 90.84              |
| XC5    | 69.48                 | 6.95                  | 96.19                    | 70.91                  | 97.74              | 90.47              |
| XC6    | 69.64                 | 6.96                  | 96.18                    | 70.89                  | 97.77              | 90.55              |
| XC7    | 69.55                 | 6.96                  | 96.43                    | 71.3                   | 97.78              | 90.62              |
| XC8    | 69.62                 | 6.96                  | 96.17                    | 71.03                  | 97.83              | 90.76              |
| XC9    | 67.12                 | 6.71                  | 96.29                    | 71.36                  | 97.85              | 90.87              |
| XCT1   | 65.4                  | 6.54                  | 96.24                    | 72.23                  | 98.08              | 91.72              |
| XCT2   | 65.26                 | 6.53                  | 96.32                    | 71.8                   | 98                 | 91.43              |
| XCT3   | 63.04                 | 6.3                   | 96.33                    | 71.7                   | 98.11              | 91.8               |
| XCT4   | 64.9                  | 6.49                  | 96.58                    | 72.1                   | 98.08              | 91.68              |
| XCT5   | 64.95                 | 6.5                   | 96.43                    | 71.69                  | 98.11              | 91.72              |
| XCT6   | 65.04                 | 6.5                   | 96.58                    | 71.97                  | 98.11              | 91.78              |
| XCT7   | 65.17                 | 6.52                  | 96.57                    | 71.53                  | 98.18              | 91.97              |
| XCT8   | 65.3                  | 6.53                  | 96.45                    | 71.62                  | 98.14              | 91.81              |
| XCT9   | 62.84                 | 6.28                  | 96.31                    | 71.52                  | 98.22              | 92.14              |

Note: HJML 0 d consist of HJML1-3, HJML 3 d consist of HJML4-6, HJML 6 d consist of HJML7-9. HY 0 d consist of HY1-3, HY 3 d consist of HY4-6, HY 6 d consist of HY7-9. XC 0 d consist of XC1-3, XC 3 d consist of XC4-6, XC 6 d consist of XC 7-9.

XC 0 d consist of XCT1-3, XC 4 d Control consist of XCT4-6, XC 4 d NAA consist of XCT 7-9.
