# Supplementary material for: Transcriptomic Analysis Reveals Genes Associated with the Regulation of Peach Fruit Softening and Senescence during Storage
Source: MDPI journal article supplement (doi:10.3390/foods12081648), 2023-04-14
Supplement: s1 [file s1]

Supplementary file S7: FPKM and functional description of candidate genes

| Gene ID               | FPKM of Samples |           |           |           |           |           |             |             |             | Functional description                                               |
|-----------------------|-----------------|-----------|-----------|-----------|-----------|-----------|-------------|-------------|-------------|----------------------------------------------------------------------|
|                       | XC<br>0 d       | XC<br>3 d | XC<br>6 d | HY<br>0 d | HY<br>3 d | HY<br>6 d | HJML<br>0 d | HJML<br>3 d | HJML<br>6 d |                                                                      |
| <i>Prupe.1G034300</i> | 19.15           | 46.54     | 60.00     | 19.80     | 18.45     | 19.09     | 26.90       | 168.73      | 201.38      | Ethylene response sensor 2-related                                   |
| <i>Prupe.1G042500</i> | 0.62            | 0.92      | 0.75      | 0.40      | 1.09      | 1.13      | 1.37        | 9.10        | 12.53       | Phosphate transporter PHO1                                           |
| <i>Prupe.1G412400</i> | 0.65            | 0.76      | 1.02      | 1.67      | 0.75      | 1.49      | 3.50        | 10.52       | 9.86        | Uncharacterized conserved protein                                    |
| <i>Prupe.1G526700</i> | 20.45           | 30.60     | 27.53     | 14.84     | 17.15     | 18.74     | 17.98       | 96.70       | 99.85       | Ovarian cancer gene-2 protein-related // subfamily not named         |
| <i>Prupe.2G140600</i> | 4.34            | 2.65      | 3.40      | 2.41      | 2.64      | 3.81      | 10.27       | 25.14       | 11.71       | Auxin-regulated protein-related                                      |
| <i>Prupe.2G176900</i> | 0.76            | 3.98      | 6.67      | 0.06      | 4.97      | 1.21      | 126.04      | 1568.69     | 2493.94     | 1-aminocyclopropane-1-carboxylate synthase-like protein 1            |
| <i>Prupe.2G307400</i> | 13.27           | 5.34      | 2.24      | 0.66      | 3.24      | 0.38      | 3.47        | 32.73       | 16.32       | WRKY DNA -binding domain (WRKY)                                      |
| <i>Prupe.3G024700</i> | 0.11            | 0.29      | 0.87      | 0.03      | 0.03      | 0.03      | 0.36        | 10.73       | 10.79       | Receptor like protein 3-related                                      |
| <i>Prupe.3G074800</i> | 22.97           | 149.66    | 171.28    | 28.51     | 296.65    | 151.35    | 427.27      | 1105.54     | 1159.67     | Auxin-responsive protein iaa19-related                               |
| <i>Prupe.3G098100</i> | 2.82            | 4.43      | 9.20      | 0.25      | 2.85      | 0.26      | 2.36        | 61.42       | 73.20       | WRKY transcription factor 40-related                                 |
| <i>Prupe.5G054500</i> | 97.02           | 108.09    | 99.79     | 115.87    | 139.53    | 116.76    | 146.10      | 307.77      | 501.04      | Serine/threonine kinase // subfamily not named                       |
| <i>Prupe.6G226100</i> | 0.08            | 0.15      | 0.03      | 0.01      | 0.14      | 0.13      | 16.28       | 73.29       | 70.56       | Auxin responsive GH3 gene family (GH3)                               |
| <i>Prupe.6G286000</i> | 35.62           | 21.12     | 12.80     | 2.94      | 7.48      | 2.14      | 19.33       | 64.30       | 58.10       | WRKY transcription factor 33 (WRKY33)                                |
| <i>Prupe.7G160600</i> | 0.51            | 0.60      | 1.76      | 0.21      | 0.62      | 0.26      | 0.94        | 2.26        | 9.76        | Camp-response element binding Protein-related // subfamily not named |
| <i>Prupe.7G234800</i> | 0.32            | 3.08      | 8.40      | 3.74      | 6.19      | 6.36      | 20.29       | 160.61      | 234.97      | Auxin-responsive protein IAA15                                       |
| <i>Prupe.7G244300</i> | 8.09            | 4.66      | 7.07      | 11.59     | 4.32      | 4.45      | 5.78        | 22.34       | 19.78       | EIN3-binding F-box protein (EBF1_2)                                  |
| <i>Prupe.7G247500</i> | 0.07            | 0.22      | 0.04      | 0.02      | 9.53      | 0.60      | 34.31       | 185.89      | 62.56       | Auxin-responsive protein IAA (IAA)                                   |
| <i>Prupe.8G153100</i> | 0.10            | 0.49      | 3.60      | 0.50      | 0.41      | 0.17      | 0.37        | 4.47        | 10.83       | Pathogenesis-related protein 1 (PR1)                                 |
| <i>Prupe.8G153700</i> | 0.07            | 2.61      | 5.79      | 0.34      | 3.00      | 3.67      | 0.84        | 10.81       | 18.36       | Pathogenesis-related protein 1 (PR1)                                 |
| <i>Prupe.8G153800</i> | 129.63          | 174.69    | 213.53    | 16.44     | 41.88     | 12.87     | 183.62      | 415.70      | 531.36      | Pathogenesis-related protein 1 (PR1)                                 |

Note: Function description data was from JGI database ([https://phytozome.jgi.doe.gov/pz/portal.html#!info?alias=Org\\_Ppersica](https://phytozome.jgi.doe.gov/pz/portal.html#!info?alias=Org_Ppersica))
