# Supplementary material for: Transcriptomic Analysis Reveals Genes Associated with the Regulation of Peach Fruit Softening and Senescence during Storage
Source: MDPI journal article supplement (doi:10.3390/foods12081648), 2023-04-14
Supplement: s1 [file s1]

Supplementary file S2 qRT-PCR primers for candidate genes

| Gene ID               | Sense Primer (5'-3')   | Anti-sense Primer (5'-3') |
|-----------------------|------------------------|---------------------------|
| <i>Prupe.1G034300</i> | GTTGGCCGAGCAAAATCGAG   | GACATTGCTCGTCCTCACCA      |
| <i>Prupe.2G176900</i> | GGCAAGGTTCTTGAGACAA    | CACAATCACACGCCAAAGCA      |
| <i>Prupe.3G024700</i> | CAGCCACTTACCGGTGTTCT   | GTGAGGGAAGTGTGATCGCT      |
| <i>Prupe.3G098100</i> | AGCCTGGTTGTGAAGGATGG   | AGCTTGAGGAGGGGACTGAT      |
| <i>Prupe.6G226100</i> | TTCTTGAGGTCACCGGCTTC   | CTCGTGACTCAACCACGCT       |
| <i>Prupe.7G234800</i> | ATGGAGCTCCTTACTTGCGG   | TAAGCTGCTCCTGGTTGCTC      |
| <i>Prupe.7G247500</i> | AACACTCGCAGACACCTTGA   | GCAAGAAGCCAGTCTCCCTC      |
| <i>TEF2</i>           | GGTGTGACGATGAAGAGTGATG | TGAAGGAGAGGGAAGGTGAAAG    |
