# Supplementary material for: Transcriptomic Analysis Reveals Genes Associated with the Regulation of Peach Fruit Softening and Senescence during Storage
Source: MDPI journal article supplement (doi:10.3390/foods12081648), 2023-04-14
Supplement: s1 [file s1]

Supplementary file S8 FPKM of 20 candidate genes in figure 7

| Gene name             | XC 0 d |        |        | XC 4 d Control |        |        | XC 4 d NAA |        |        |
|-----------------------|--------|--------|--------|----------------|--------|--------|------------|--------|--------|
|                       | XCT1   | XCT2   | XCT3   | XCT4           | XCT5   | XCT6   | XCT7       | XCT8   | XCT9   |
| <i>Prupe.1G034300</i> | 26.87  | 30.59  | 33.37  | 27.2           | 32.55  | 26.82  | 517.93     | 498.76 | 492.42 |
| <i>Prupe.1G042500</i> | 1.47   | 1.72   | 1.72   | 1.01           | 1.13   | 0.74   | 2.6        | 2.85   | 2.64   |
| <i>Prupe.1G412400</i> | 0.76   | 0.88   | 0.77   | 1.36           | 1.22   | 1.08   | 8.05       | 8.64   | 9.47   |
| <i>Prupe.1G526700</i> | 24.1   | 30.29  | 34.1   | 21.61          | 24.73  | 27.76  | 54.22      | 51.13  | 50.57  |
| <i>Prupe.2G140600</i> | 9.14   | 9.96   | 12.6   | 2.98           | 3.8    | 3.19   | 4.42       | 4.83   | 3.32   |
| <i>PpACSI</i>         | 0.22   | 0.47   | 0.48   | 1.61           | 1.37   | 1.77   | 198.47     | 184.83 | 208.09 |
| <i>Prupe.2G307400</i> | 20.89  | 31.77  | 40.87  | 3.88           | 11.63  | 9.88   | 11.66      | 14.44  | 10.57  |
| <i>Prupe.3G024700</i> | 0      | 0.04   | 0.04   | 0.13           | 0.31   | 0.19   | 43.29      | 38.42  | 39.35  |
| <i>Prupe.3G074800</i> | 16.45  | 18.09  | 18.28  | 131.9<br>1     | 153.44 | 156.87 | 320.08     | 298.68 | 302.57 |
| <i>Prupe.3G098100</i> | 1.65   | 4.41   | 6.17   | 5.14           | 15.72  | 12.39  | 75.09      | 73.99  | 68.61  |
| <i>Prupe.5G054500</i> | 154.6  | 146.61 | 145.09 | 100.7<br>1     | 110.86 | 116.08 | 282.19     | 276.07 | 275.35 |
| <i>Prupe.6G226100</i> | 0.05   | 0.08   | 0.03   | 0.03           | 0.1    | 0.1    | 48.38      | 44.33  | 47.91  |
| <i>Prupe.6G286000</i> | 47.92  | 79     | 94.97  | 10.98          | 27.68  | 18.53  | 23.45      | 24.07  | 20.62  |
| <i>Prupe.7G160600</i> | 0.57   | 0.58   | 0.36   | 0.23           | 1.28   | 0.81   | 5.22       | 7.9    | 7.5    |
| <i>Prupe.7G234800</i> | 0.95   | 1.67   | 1.33   | 5.33           | 9.68   | 6.62   | 292.16     | 266.06 | 256.48 |
| <i>Prupe.7G244300</i> | 13.03  | 14.11  | 14.3   | 8.84           | 8.16   | 7.46   | 32.44      | 33.48  | 33.49  |
| <i>Prupe.7G247500</i> | 0      | 0.07   | 0      | 0.43           | 1.01   | 0.72   | 35.3       | 34.99  | 31.65  |
| <i>Prupe.8G153100</i> | 0.56   | 0.51   | 0.31   | 0.67           | 0.85   | 0.4    | 2.56       | 1.84   | 2.35   |
| <i>Prupe.8G153700</i> | 0      | 0.52   | 0.16   | 0.74           | 0.5    | 0.28   | 11.68      | 10.24  | 13.63  |
| <i>Prupe.8G153800</i> | 12.31  | 15.52  | 13.02  | 86.55          | 72.7   | 64.28  | 203.99     | 238.48 | 263.31 |

Note: 'XC' represents 'Xia Cui'.
