# Supplementary material for: Transcriptomic Analysis Reveals Genes Associated with the Regulation of Peach Fruit Softening and Senescence during Storage
Source: MDPI journal article supplement (doi:10.3390/foods12081648), 2023-04-14
Supplement: s1 [file s1]

Supplementary file S5: Gene Ontology classification of differentially expressed genes from up-regulated and down-regulated candidate genes by Venn diagram analysis.

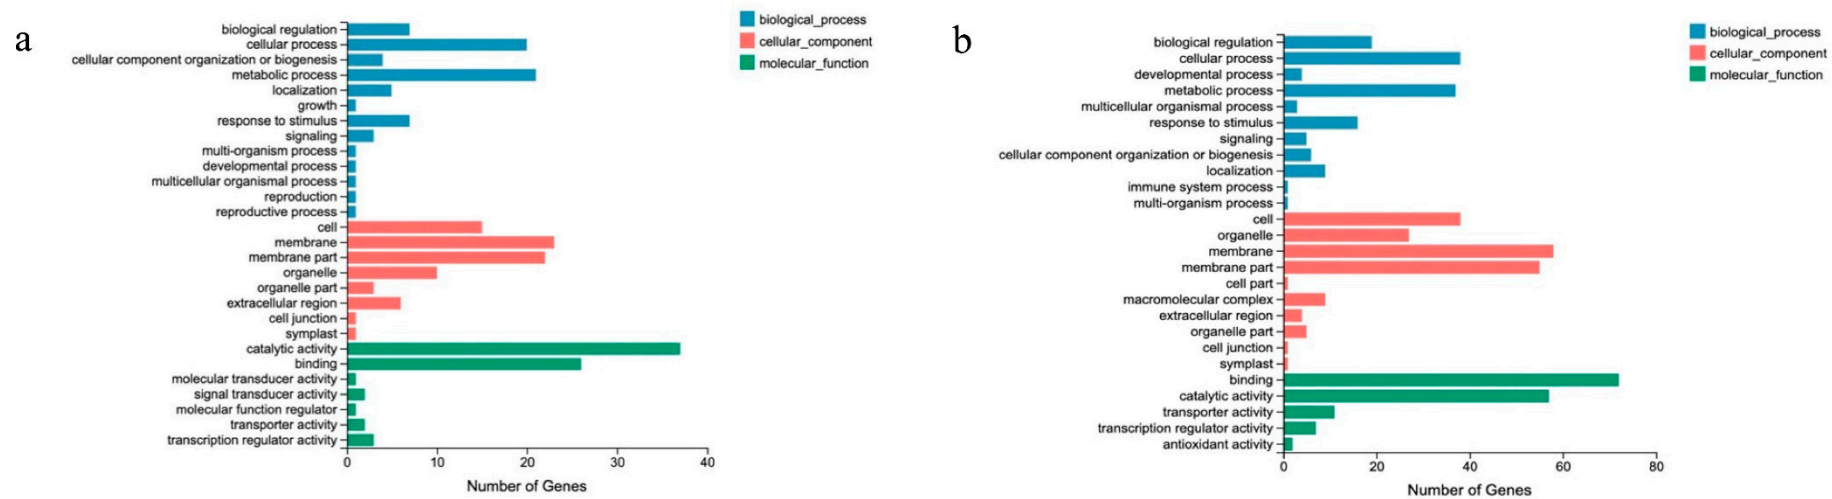

a, Gene Ontology classification of 159 DEGs from up-regulated candidate genes. b, Gene Ontology classification of 365 DEGs from down-regulated candidate genes.
