# Supplementary material for: Transcriptomic Analysis Reveals Genes Associated with the Regulation of Peach Fruit Softening and Senescence during Storage
Source: Foods. 2023 Apr 14;12(8):1648. doi: 10.3390/foods12081648 (PMC10137801; doi:10.3390/foods12081648)
Supplement: Supplementary file 1 [file foods-12-01648-s001.zip]

Archive with 8 entries (8 files):
- Supplementary File 1.pdf
- Supplementary File 2.pdf
- Supplementary File 3.xlsx
- Supplementary File 4.xlsx
- Supplementary File 5.pdf
- Supplementary File 6.pdf
- Supplementary File 7.pdf
- Supplementary File 8.pdf
