# Supplementary material for: Transcriptomic Analysis Reveals Genes Associated with the Regulation of Peach Fruit Softening and Senescence during Storage
Source: Foods. 2023 Apr 14;12(8):1648. doi: 10.3390/foods12081648 (PMC10137801; doi:10.3390/foods12081648)
Supplement: Supplementary file 1 [file foods-12-01648-s001.zip › Supplementary File 3.xlsx]

## Sheet: Supplementary File S3
Gene ID	log2(HJML 3 d/HJML 0 d)	Qvalue(HJML 0 d-vs-HJML 3 d)	log2(HJML 3 d/XC 3 d)	Qvalue(XC 3 d-vs-HJML 3 d)	log2(HJML 6 d/XC 6 d)	Qvalue(XC 6 d-vs-HJML 6 d)	log2(HJML 3 d/HY 3 d)	Qvalue(HY 3 d-vs-HJML 3 d)	log2(HJML 6 d/HY 6 d)	Qvalue(HY 6 d-vs-HJML 6 d)	HJML7 FPKM	HJML8 FPKM	HJML9 FPKM
BGI_novel_G000319	3.73508	0	4.58447	0	3.90188	0	2.65468	0	2.41423	0	295.99	304.5	296.41
BGI_novel_G000473	2.32822	1.40281e-52	3.97829	5.54489e-85	4.61305	2.20401e-166	1.91927	1.31618e-41	2.60235	1.89542e-104	13.1	13.12	14.4
BGI_novel_G000666	1.86894	1.24845e-10	4.20152	4.91488e-21	7.25048	2.75145e-65	7.53218	1.54241e-21	7.18229	4.72376e-64	9.14	6.44	7.78
BGI_novel_G000725	1.80649	1.61364e-122	3.46188	1.62261e-251	4.7128	0	2.99827	1.251e-222	4.01226	0	9.75	10.41	9.62
Prupe.1G007300	3.79995	0	5.17899	0	5.70762	0	11.9691	1.8913e-232	12.6618	0	131.96	128.23	129.04
Prupe.1G033700	5.30222	0	4.90051	0	4.71812	0	7.65809	0	8.93338	0	64.4	63.92	61.72
Prupe.1G034300	2.64643	0	1.85785	0	1.75082	0	3.18793	0	3.39862	0	193.63	203	207.51
Prupe.1G042500	2.7243	7.68226e-225	3.30106	2.59245e-270	4.0731	0	3.05301	4.58703e-253	3.47529	0	12.12	12.05	13.43
Prupe.1G044000	1.17197	2.81735e-114	1.31782	7.2818e-137	1.18342	1.33355e-109	1.18593	7.82922e-117	1.17729	3.92942e-106	68.72	67.38	65.97
Prupe.1G044100	1.58047	4.33569e-49	2.15918	1.55739e-73	2.58752	9.25887e-140	1.90992	2.26695e-63	2.65097	5.14902e-140	16.24	21	20.27
Prupe.1G044300	4.21092	0	4.20625	0	3.72895	0	4.8138	0	3.79465	0	200.41	217.51	212.54
Prupe.1G105800	1.77679	0	1.84795	0	1.95164	0	2.0519	0	2.17462	0	878.23	930.11	922.05
Prupe.1G111800	1.72676	0	1.87575	0	2.39899	0	2.55378	0	3.08594	0	79.68	80.6	86.68
Prupe.1G111900	1.41988	0	3.21277	0	3.61225	0	3.35118	0	4.8855	0	1592.63	1678.31	1627.81
Prupe.1G114500	5.02614	0	4.394	0	2.83024	0	5.23741	0	5.00443	0	1133.41	1121.18	1119.04
Prupe.1G152100	2.37091	3.94462e-218	1.82308	1.39546e-156	3.29383	0	2.22914	1.03405e-203	5.70563	0	23.02	23.53	21.7
Prupe.1G187200	3.07194	0	1.54164	0	1.21477	2.91647e-282	2.37224	0	2.99751	0	304.29	312.41	301.97
Prupe.1G205400	1.84477	5.23622e-15	8.14084	4.08593e-30	6.01367	2.50936e-113	4.34221	3.87548e-32	9.91817	2.35389e-78	12.48	11.59	9.77
Prupe.1G228500	2.82494	2.88739e-40	1.44132	8.69663e-18	1.01165	5.83346e-10	1.72568	7.65343e-23	1.51571	1.02549e-16	7.71	5.63	5.82
Prupe.1G233000	4.46216	0	1.30065	1.04034e-166	1.32294	8.94155e-170	2.61623	0	2.33742	0	102.37	100.85	101.44
Prupe.1G233600	1.90644	1.92114e-251	1.82817	5.09427e-238	1.63684	1.11553e-198	2.21325	5.75595e-306	2.16039	7.65757e-281	55.67	50.13	58.38
Prupe.1G238800	1.63832	7.56321e-09	1.54945	5.53121e-08	3.23562	1.75924e-36	3.46506	3.84407e-18	7.62685	8.18903e-43	6.14	6.49	5.06
Prupe.1G255100	2.26527	0	1.39767	1.55164e-227	3.30867	0	1.34474	1.72541e-215	1.93848	0	133.62	126.8	136.84
Prupe.1G267500	1.35297	0	2.41534	0	2.50978	0	2.69839	0	2.30655	0	81.77	84.38	84.45
Prupe.1G292000	2.24601	7.00612e-85	1.35831	5.38507e-43	1.68619	2.8307e-103	3.91047	1.51795e-143	4.79503	3.7499e-274	11.03	11.95	13.34
Prupe.1G297000	3.69722	2.87016e-17	4.29284	2.28072e-18	4.66769	8.68467e-29	3.13164	3.4222e-15	4.92142	1.3038e-28	8.93	14.38	12.34
Prupe.1G303500	1.38594	1.13603e-10	1.31859	1.08499e-09	1.41437	3.69371e-12	3.70078	1.54391e-29	5.02425	6.24381e-38	9.9	10.67	9.61
Prupe.1G308600	1.73518	3.45447e-29	1.60289	6.26104e-26	2.31136	3.16706e-97	5.33953	1.13253e-75	5.35279	1.06217e-175	9.63	9.62	9.65
Prupe.1G310700	1.47993	7.5926e-84	1.0591	2.90903e-50	1.09689	4.50211e-56	1.25348	1.16175e-65	1.26182	5.92452e-68	20.88	19.25	20.37
Prupe.1G322200	2.82253	0	1.48954	0	1.44759	0	2.7376	0	2.67665	0	476.69	434.52	459.63
Prupe.1G332000	5.5578	0	2.79786	0	3.56598	0	4.83212	0	4.66867	0	240.38	226.25	231.99
Prupe.1G336200	4.11686	7.30341e-183	1.97696	1.84434e-89	2.47919	9.32358e-95	2.84937	4.81913e-137	6.44442	9.43431e-157	7.63	7.64	8.27
Prupe.1G412400	1.57504	2.77061e-53	3.80603	8.81836e-140	3.31749	3.38672e-112	3.8439	2.47406e-141	2.86228	1.01643e-95	10.58	9.44	9.57
Prupe.1G442300	3.57441	0	4.133	0	4.04504	0	6.38966	0	5.94698	0	58.76	66.83	64.07
Prupe.1G469000	1.17248	7.81563e-57	1.98771	2.01784e-120	2.65463	2.08004e-169	2.19466	4.97188e-137	2.10954	1.39916e-126	8.4	7.86	8.74
Prupe.1G472300	5.23417	0	1.97907	2.0088e-211	3.19179	0	3.49576	0	3.92725	0	89.61	82.92	83.09
Prupe.1G505400	1.28542	0	1.86905	0	2.43377	0	1.27768	0	1.30303	0	84.44	85.6	87.49
Prupe.1G511100	2.65318	3.5971e-293	2.01748	3.98965e-212	1.24072	4.99724e-65	3.35243	0	3.08537	9.82805e-203	13.2	13.39	11.57
Prupe.1G511200	2.7922	4.36894e-83	3.13891	1.24472e-92	1.05373	4.79083e-09	4.83044	4.39064e-122	3.90837	1.90872e-37	8.11	5.61	6.56
Prupe.1G526700	2.42219	0	1.6616	0	1.86587	0	2.48722	0	2.41228	0	101.78	95.33	102.44
Prupe.1G547500	1.61179	0	1.63067	0	1.3365	0	1.79407	0	2.37632	0	69.73	71.39	73.15
Prupe.1G556500	1.47181	7.53533e-139	1.74472	5.70369e-177	1.25036	8.24559e-55	3.36436	0	3.88422	1.11905e-201	6.42	5.91	6.67
Prupe.1G561600	1.41759	8.79429e-303	1.35356	6.88254e-283	2.18528	0	2.18311	0	2.5764	0	615.84	589.33	646.48
Prupe.1G572800	2.66437	0	1.35135	0	1.89951	0	2.05101	0	2.07294	0	604.54	639.88	625.02
Prupe.2G004000	1.60245	0	3.88587	0	3.47257	0	3.47767	0	3.23154	0	93.09	83.74	90.46
Prupe.2G023200	1.65181	3.07823e-125	2.73082	7.39625e-234	4.44423	0	4.43847	0	5.8996	0	50.16	44.43	46.84
Prupe.2G108400	3.32416	7.96862e-138	3.38599	6.92118e-140	3.58029	2.7934e-186	5.77358	4.29534e-178	6.08156	5.04102e-220	8.54	8.82	8.54
Prupe.2G121500	2.61929	1.09749e-79	3.37776	4.4288e-101	3.3442	6.86056e-96	4.86648	2.04066e-125	5.86097	1.24291e-119	16.81	17.2	17.9
Prupe.2G140600	1.282	2.25533e-45	3.24522	3.27308e-142	1.7977	4.87152e-34	3.23707	1.56041e-142	1.62733	3.55991e-29	12.43	11.79	10.9
Prupe.2G156500	1.6395	0	2.33076	0	3.07067	0	3.65747	0	3.72701	0	69.87	69.97	70.2
Prupe.2G176900	3.63394	0	8.62183	0	8.54987	0	8.29118	0	11.0089	0	2523.91	2489.35	2468.55
Prupe.2G178100	2.53523	0	1.21618	0	1.47757	0	3.7378	0	3.07057	0	405.81	402.86	425.35
Prupe.2G188300	1.40611	2.68077e-37	1.65164	2.40529e-46	1.98305	2.92471e-91	3.35285	3.61746e-104	6.6153	1.16333e-196	17.03	13.01	17.14
Prupe.2G200800	1.86261	0	1.32105	0	1.74948	0	1.2864	0	1.97176	0	190.98	190.23	185.09
Prupe.2G202700	2.34183	0	1.53527	0	1.89862	0	2.04687	0	1.77192	0	84.42	83.2	83.41
Prupe.2G206100	2.74907	0	2.0374	0	1.30497	4.30839e-287	2.05828	0	2.40935	0	48.89	48.4	49
Prupe.2G207600	3.12756	0	2.33188	0	2.17985	0	1.92245	0	1.85835	0	6389.39	6473.76	6466.29
Prupe.2G217400	4.65898	1.44876e-292	2.29862	2.11243e-162	2.36727	1.01281e-233	4.22906	1.88559e-281	6.25715	0	38.1	33.14	35.24
Prupe.2G262900	1.72064	6.73372e-210	1.4875	1.49133e-170	1.80852	1.14381e-197	5.34616	0	5.34079	0	119.27	101.45	112.27
Prupe.2G267600	1.61222	0	1.2441	0	2.43404	0	1.321	0	1.64647	0	387.92	392.15	379.74
Prupe.2G282900	2.35777	0	2.24879	0	2.0011	2.98138e-279	2.58705	0	2.20043	3.08629e-307	28.17	27.76	27.57
Prupe.2G303400	3.05082	0	1.50725	0	1.5638	0	4.43368	0	3.93394	0	204.65	197.56	196.18
Prupe.2G307400	3.22976	0	2.61514	0	2.87526	9.47297e-176	3.32715	0	5.41951	2.13523e-251	16.97	16.19	15.81
Prupe.2G311700	2.26046	0	1.13974	0	1.63706	0	1.86784	0	1.90285	0	43.36	45	45.63
Prupe.3G019100	1.99891	3.72281e-13	1.59453	8.03692e-10	2.43806	3.04882e-22	3.07275	5.1137e-20	6.27676	1.26893e-36	19.12	16.3	16.21
Prupe.3G024700	4.91303	0	5.19162	0	3.62908	0	8.49313	0	8.41887	0	10.68	11.13	10.55
Prupe.3G044600	2.73413	0	1.07304	5.50918e-219	1.77375	0	2.67125	0	3.90117	0	87.73	84.68	87.21
Prupe.3G050200	1.12633	0	1.62527	0	3.14125	0	2.99357	0	4.24673	0	715.62	750.73	739.68
Prupe.3G074800	1.36441	0	2.88841	0	2.77246	0	1.8801	0	2.939	0	1152.45	1142.39	1184.16
Prupe.3G098100	4.69424	0	3.79614	0	3.00358	0	4.41989	0	8.16901	0	74.98	73.64	70.99
Prupe.3G134900	3.06813	0	3.63349	0	1.2772	5.2328e-56	5.24312	0	4.76774	3.95121e-221	18.46	17.09	17.7
Prupe.3G143900	2.97135	0	1.07508	1.51273e-239	1.58097	0	3.23935	0	4.79564	0	167.57	162.88	151.06
Prupe.3G193600	4.86757	1.69931e-100	1.46319	9.90368e-31	1.87327	1.29509e-62	2.9112	1.30008e-71	1.64298	2.77366e-51	21.41	20.27	21.01
Prupe.3G194200	2.17164	3.60574e-83	2.69167	6.67761e-106	4.25698	2.42029e-195	1.12849	1.65893e-33	1.84396	1.14018e-83	13.12	10.51	10.93
Prupe.3G239900	2.66763	0	3.22248	0	3.49217	0	4.45808	0	5.63936	0	95.38	81.91	86.93
Prupe.3G240000	4.13913	3.08658e-186	5.0932	1.40667e-202	4.15799	3.22454e-98	8.80237	2.55304e-168	8.84469	1.02909e-85	7.57	7.69	7.43
Prupe.3G243500	4.20534	0	2.40821	0	2.70789	0	1.61302	0	2.14395	0	106.26	102.5	103.84
Prupe.3G255800	6.33258	1.69375e-57	1.6428	1.06825e-20	3.69655	8.13671e-91	3.35197	1.03544e-45	1.65791	2.48553e-37	8.95	7.3	8.86
Prupe.3G269400	3.01203	0	3.94869	0	3.97448	0	4.38882	0	4.59339	0	48.71	51.31	48.8
Prupe.3G311600	4.11238	0	1.88355	0	1.38338	0	4.00658	0	4.90758	0	98.44	88.71	100.19
Prupe.4G008300	1.6975	3.36057e-57	1.31949	9.90229e-40	1.50113	3.96198e-79	1.49748	4.54894e-48	1.60546	4.99632e-85	7.82	7.87	8.06
Prupe.4G047800	2.23652	0	2.60821	0	2.77246	0	2.51011	0	4.01127	0	4035.64	4195.16	4120.23
Prupe.4G053500	1.56659	3.7068e-60	1.41452	1.09336e-51	1.59562	2.50013e-82	2.93782	2.13602e-129	3.40838	7.78163e-193	44.2	39.59	46.05
Prupe.4G059600	2.32692	0	3.93632	0	4.19762	0	6.64444	0	7.55644	0	125.18	135.51	123.85
Prupe.4G082000	3.93066	0	3.25864	0	2.35298	0	3.43929	0	3.41053	0	413.27	435.87	440.23
Prupe.4G082100	3.9179	4.34375e-164	3.16462	2.76978e-139	2.42501	1.7515e-66	3.45575	1.13124e-150	3.74728	5.05255e-97	47.84	50.75	44.59
Prupe.4G092500	2.45951	0	2.53695	0	2.63008	0	3.64218	0	2.81188	0	137.98	145.81	143.12
Prupe.4G117900	1.52326	0	2.54186	0	1.43783	0	2.86127	0	1.69257	0	75.11	75.45	74.89
Prupe.4G155100	2.12475	8.21484e-69	3.95853	1.57977e-124	3.61503	6.88663e-107	3.93073	1.46514e-124	3.81602	2.26262e-108	6.77	8.97	7.48
Prupe.4G161400	7.42114	1.30948e-223	5.9293	1.47436e-239	3.70695	1.59334e-79	7.21813	4.05477e-228	4.93832	1.29941e-89	28.49	26.35	30.06
Prupe.4G166100	5.2904	5.97088e-65	6.10841	6.50637e-65	6.38996	5.72934e-75	6.53218	1.67307e-64	6.32177	2.34897e-73	13.92	16.57	14.36
Prupe.4G166200	6.56116	4.42279e-152	10.3792	6.65714e-102	10.2959	1.1152e-93	10.3879	2.82755e-102	10.2277	2.17982e-92	14.37	13.04	12.95
Prupe.4G170900	8.6156	1.83571e-77	4.23394	5.99057e-85	4.94522	7.64725e-75	6.63499	3.98299e-91	5.16654	7.45938e-74	26.61	33.15	28.28
Prupe.4G196400	1.82348	2.33399e-298	3.1876	0	2.85748	0	2.18639	0	2.49383	1.93907e-300	13.56	13.93	13.65
Prupe.4G214900	1.54649	5.2481e-234	2.2615	0	1.9055	1.28986e-213	1.7371	1.66092e-277	1.31364	1.90184e-122	49.91	53.02	53.17
Prupe.4G237700	2.05511	1.00224e-102	2.17943	2.45614e-110	2.62688	1.0591e-148	2.22503	1.072e-113	2.0544	9.56327e-109	10.04	8.75	9.8
Prupe.4G261900	8.2862	0	8.41583	0	6.40281	0	3.15249	0	3.90427	0	6608.3	6685.48	6492.26
Prupe.5G006700	1.71022	2.61768e-39	1.639	8.92991e-37	1.1468	8.51557e-21	1.78324	1.68649e-41	1.97274	8.68993e-43	13.32	13.96	14.29
Prupe.5G017800	4.33616	3.51459e-211	4.55593	3.24278e-216	4.23956	3.36584e-236	7.67807	4.99956e-209	7.45003	6.52267e-234	11.72	11.62	12.93
Prupe.5G052200	2.13369	0	1.21993	0	1.71577	0	2.44465	0	3.06127	0	90.91	94.35	97.48
Prupe.5G054400	1.00942	0	2.01416	0	2.5338	0	1.53244	0	2.80039	0	321.97	320.4	331.32
Prupe.5G054500	1.07045	0	1.51084	0	2.33545	0	1.13214	0	2.10135	0	514.74	493.3	495.09
Prupe.5G072500	1.58083	0	8.54786	0	8.95457	0	2.59039	0	4.39404	0	1112.71	1120.7	1079.33
Prupe.5G117000	2.41778	0	2.35716	0	3.17063	0	3.62225	0	4.78269	0	270.41	263.04	260.95
Prupe.5G129600	1.9958	4.53541e-62	1.35438	2.842e-36	2.64086	7.77409e-173	1.645	3.97548e-48	2.5871	5.84297e-165	48.05	43.45	40.96
Prupe.5G130800	6.62322	5.85134e-136	2.57498	3.26505e-84	2.24623	5.14906e-69	5.42021	1.09749e-138	4.7515	8.21216e-125	6.28	6.26	5.86
Prupe.5G155700	2.14325	1.44049e-140	2.34655	8.7566e-157	2.10114	4.06033e-92	2.692	1.48328e-183	1.94297	1.9789e-81	7.43	6.67	7.13
Prupe.5G171900	3.58537	6.93104e-171	1.22052	3.02123e-46	1.12088	3.38071e-45	2.38795	6.10464e-116	1.63614	3.86057e-77	13.43	15.09	14.8
Prupe.5G181300	1.9866	0	1.87195	0	1.19131	0	2.66728	0	1.94213	0	351.2	343.56	340.06
Prupe.5G202800	1.19893	1.96812e-18	1.60499	3.70705e-27	3.76095	4.16277e-162	2.21831	2.63746e-41	5.76315	2.93106e-185	8.55	9.38	7.57
Prupe.6G029400	1.48522	0	2.42009	0	1.76149	0	2.76911	0	1.91862	0	56.71	59.91	59.2
Prupe.6G031100	1.82248	6.95195e-25	1.11252	1.41089e-12	1.62177	1.57786e-26	1.01433	2.95469e-11	2.8955	4.43203e-51	13.72	11.49	11.67
Prupe.6G040700	1.87711	1.90989e-19	1.48723	3.46859e-14	2.58752	1.97951e-40	2.3309	7.68191e-25	3.29693	1.27978e-49	7.2	5.85	7.32
Prupe.6G047900	1.37156	3.13549e-50	1.20713	3.08896e-41	3.00165	1.64521e-284	3.49714	2.76803e-152	4.00512	0	20.71	19.81	22.87
Prupe.6G056100	4.61639	0	1.54361	0	3.26198	0	3.40594	0	4.82045	0	446.95	438.29	454.47
Prupe.6G084100	1.1987	2.29015e-26	1.29848	3.09268e-29	2.23427	9.90824e-137	4.33578	3.13364e-109	4.76811	7.93316e-251	34.7	36.4	35.73
Prupe.6G128500	1.67829	0	2.5498	0	2.13036	0	2.03214	0	1.86361	0	680.83	683.31	667.89
Prupe.6G141100	3.48989	0	5.73231	0	5.83059	0	9.44675	0	10.8385	0	1107.59	1057.42	1080.01
Prupe.6G157500	1.06928	1.90029e-124	8.98883	0	10.4342	0	6.62832	0	9.04408	0	61.38	61.34	66.62
Prupe.6G157800	2.6319	2.02427e-68	3.14345	4.5801e-81	2.39615	4.06354e-61	2.61331	5.01354e-68	2.76406	1.41436e-69	15.96	16.97	15.95
Prupe.6G180500	3.40961	5.96532e-107	2.07712	1.29847e-63	2.52193	3.10227e-91	3.51146	7.97062e-110	3.63271	6.0793e-125	5.7	6.29	7.32
Prupe.6G220100	3.18264	6.4405e-21	4.45634	1.88934e-25	3.76674	5.63171e-25	7.78699	7.97836e-25	7.86848	1.30435e-25	8.26	11.85	9.52
Prupe.6G220200	4.1577	2.74929e-58	4.61582	7.09284e-61	2.95675	5.08201e-40	9.08397	9.14389e-51	6.3036	7.09258e-55	6.99	7.02	6.74
Prupe.6G226100	2.1662	0	8.86686	0	11.1318	0	9.02759	0	9.15676	0	68.94	73.05	69.69
Prupe.6G267800	3.2666	1.18415e-193	2.06954	1.90276e-118	2.4408	7.47576e-223	4.01871	1.19407e-226	5.36378	0	53.29	44.75	43.78
Prupe.6G286000	1.72981	0	1.60533	0	2.18639	0	3.0973	0	4.76155	0	58.66	56.14	59.5
Prupe.6G302100	2.68195	1.19908e-37	2.32583	5.47236e-32	2.22268	7.67339e-36	2.523	2.826e-35	2.9674	1.78701e-47	14.72	13.6	10.69
Prupe.6G310300	3.04389	0	2.07803	0	2.41254	0	1.98216	0	2.44286	0	11274.1	10633.5	11060
Prupe.6G310900	1.66002	1.49767e-07	2.80818	2.32459e-12	2.64586	8.66852e-15	2.33148	1.45243e-10	2.3971	3.71134e-13	7.33	10.47	14.2
Prupe.6G341400	2.2136	4.77753e-47	1.0524	6.17201e-17	1.38248	1.31435e-47	2.82666	2.10882e-61	3.47	4.90798e-138	22.65	18.21	18.92
Prupe.7G005800	4.4952	6.82259e-76	2.95332	3.60873e-56	3.22985	4.1486e-58	2.44419	1.52998e-46	2.71687	2.76861e-48	26.3	19.51	23.13
Prupe.7G039200	3.61408	1.40159e-25	1.99247	3.06358e-14	1.17383	2.53521e-05	4.63346	4.15313e-29	4.60814	1.10085e-17	10.83	6.11	5.87
Prupe.7G048000	3.14322	9.05953e-86	1.59308	1.37685e-38	3.26332	3.50439e-180	3.10686	4.19928e-85	1.42275	1.59015e-64	6.47	6.82	5.93
Prupe.7G061500	1.14936	3.90014e-24	1.4606	1.14628e-33	1.98196	6.97479e-52	2.4612	3.26192e-66	4.13983	1.48325e-102	40.84	38.02	36.32
Prupe.7G076500	4.50553	0	2.507	0	2.02743	0	4.9239	0	4.93108	0	9959.06	10057	9991.07
Prupe.7G091900	1.38867	1.21433e-221	1.6019	7.16948e-274	1.05106	1.19865e-96	1.94652	0	1.46239	4.81982e-157	15.64	16.47	15.29
Prupe.7G113300	2.06461	1.70273e-244	1.0766	8.42006e-95	2.52759	0	4.14643	0	4.08468	0	58.47	55.61	55.18
Prupe.7G160600	1.25267	2.56417e-05	1.93075	5.2048e-08	2.49386	5.33692e-38	1.85702	7.24752e-08	5.26217	6.30272e-62	8.82	11.7	8.76
Prupe.7G192800	4.32695	0	6.73518	0	6.31523	0	6.23371	0	7.08816	0	717.45	705.47	679.67
Prupe.7G193900	1.74499	0	1.18935	0	1.39463	0	1.56246	0	1.67398	0	120.55	124.02	124.48
Prupe.7G234800	2.95828	0	5.63661	0	4.8509	0	4.62974	0	5.28228	0	235.68	233.86	235.38
Prupe.7G244300	1.94624	1.14978e-306	2.2609	0	1.48852	3.85844e-179	2.36393	0	2.1519	4.70344e-289	18.13	21.59	19.62
Prupe.7G247500	2.43119	0	9.7217	0	10.4783	0	4.27427	0	6.70966	0	62.26	59.64	65.78
Prupe.7G247900	2.59793	0	3.30249	0	3.11963	0	5.10917	0	4.85321	0	25.04	24.91	31.27
Prupe.7G253800	1.41119	1.97058e-230	1.79648	0	1.37273	5.93269e-223	2.40455	0	2.55391	0	164.58	163.92	169.01
Prupe.7G256100	1.56379	0	9.53757	0	8.03658	0	2.00952	0	3.87508	0	231.42	238.75	226.09
Prupe.7G264900	1.57692	4.76681e-25	2.1795	2.7051e-37	1.58752	1.8749e-22	3.38986	1.22764e-58	2.40385	1.70614e-36	12.69	12.31	11.77
Prupe.7G271100	2.9443	0	3.58973	0	2.48774	0	4.18873	0	3.29004	0	93.18	88.75	99.09
Prupe.8G024500	2.39489	0	1.7005	0	1.81852	0	3.96919	0	5.37943	0	127.61	114.17	121.04
Prupe.8G066000	2.5877	6.59644e-190	1.52465	3.30733e-96	1.33114	3.73329e-97	2.73965	8.15001e-203	4.72461	0	73.82	59.61	73.71
Prupe.8G067800	1.8817	1.71902e-56	1.24702	1.55619e-31	1.76224	1.15802e-39	2.45857	2.96698e-78	4.86397	1.41521e-97	7.08	6.32	7.52
Prupe.8G124000	2.2513	1.93819e-98	2.0493	1.66656e-87	2.79387	1.34153e-194	1.88566	4.99751e-79	2.27173	7.25448e-151	34.85	33.87	36.12
Prupe.8G127500	2.09235	0	1.95422	0	2.10774	0	1.81276	0	2.04455	0	75.3	75.96	72.72
Prupe.8G153100	3.58423	3.79466e-27	3.2081	1.3735e-24	1.60403	2.5492e-25	3.39901	5.17957e-26	6.01476	2.13649e-71	11.97	9.34	11.17
Prupe.8G153700	3.68717	1.1155e-63	2.04493	3.02749e-35	1.68083	2.58727e-44	1.82629	7.53786e-31	2.32726	2.81077e-65	18.85	18.58	17.66
Prupe.8G153800	1.16767	0	1.25226	0	1.33297	0	3.29637	0	5.36721	0	532.85	529.17	532.05
Prupe.8G156700	1.84968	2.38734e-195	3.68518	0	4.85393	0	1.81784	9.22813e-192	3.10278	0	26.63	28.71	26.98
Prupe.8G243100	2.20132	3.53495e-135	2.3074	5.44671e-143	1.21637	1.16376e-46	2.08846	3.67955e-127	5.42119	1.16268e-203	8.86	9.94	9.81
Prupe.8G244300	1.39764	6.04298e-154	1.53734	3.39374e-177	1.29758	2.45883e-119	1.82028	1.10777e-225	1.48516	1.51122e-142	76.38	66	65.21
