# Supplementary material for: Transcriptomic Analysis Reveals Genes Associated with the Regulation of Peach Fruit Softening and Senescence during Storage
Source: Foods. 2023 Apr 14;12(8):1648. doi: 10.3390/foods12081648 (PMC10137801; doi:10.3390/foods12081648)
Supplement: Supplementary file 1 [file foods-12-01648-s001.zip › Supplementary File 4.xlsx]

## Sheet: Supplementary File S4
Gene ID	log2(HJML 3 d/HJML 0 d)	Qvalue(HJML 0 d-vs-HJML 3 d)	log2(HJML 3 d/XC 3 d)	Qvalue(XC 3 d-vs-HJML 3 d)	log2(HJML 6 d/XC 6 d)	Qvalue(XC 6 d-vs-HJML 6 d)	log2(HJML 3 d/HY 3 d)	Qvalue(HY 3 d-vs-HJML 3 d)	log2(HJML 6 d/HY 6 d)	Qvalue(HY 6 d-vs-HJML 6 d)	XC1 FPKM	XC2 FPKM	XC3 FPKM	HY1 FPKM	HY2 FPKM	HY3 FPKM
BGI_novel_G000067	-7.80425	2.27669e-26	-13.2848	0	-12.3632	0	-13.2022	0	-12.2869	6.52301e-293	56.06	54.88	53.87	37.03	37.83	33.29
BGI_novel_G000071	-2.88104	3.92375e-12	-5.33847	1.16647e-82	-5.96328	2.69342e-61	-7.04481	2.12228e-257	-7.29677	1.50026e-139	30.8	33.86	34.26	65.42	64.58	56.53
BGI_novel_G000104	-3.4476	0	-4.76361	0	-5.37669	0	-3.18784	0	-3.36992	1.53581e-305	45.97	42.95	46.1	15.12	16.52	15.1
BGI_novel_G000123	-3.23828	0	-2.17927	1.57945e-123	-2.50874	1.55291e-61	-1.977	1.14551e-95	-3.7399	7.31998e-200	37.48	34.55	39.2	30.24	28.03	26.31
BGI_novel_G000124	-3.67217	1.25869e-59	-6.57688	0	-6.38099	0	-6.38285	0	-6.45473	0	11.82	10.99	11.25	10.88	11.14	11.04
BGI_novel_G000254	-2.13644	0	-1.7771	0	-2.98916	0	-1.41758	9.82469e-238	-2.14658	1.40679e-280	17.18	16.61	16.49	10.56	10.89	10.35
BGI_novel_G000359	-2.64975	8.88702e-162	-1.65482	5.75788e-46	-1.28935	2.48538e-19	-2.01125	4.57273e-76	-2.38525	1.10689e-86	17.91	15.86	16.83	25.41	24.46	24.77
BGI_novel_G000362	-3.93017	1.57216e-222	-2.6432	9.96346e-66	-2.29085	9.20297e-28	-2.66968	5.09346e-68	-2.01957	8.92288e-20	45.7	49.92	49.16	31.45	32.68	28.05
BGI_novel_G000425	-2.11189	1.17607e-264	-1.44684	7.45953e-100	-1.29599	2.09702e-73	-1.10474	6.73018e-53	-1.1903	1.16545e-58	13.58	13.6	13.2	10.49	10.35	8.74
BGI_novel_G000503	-1.47968	5.86188e-39	-2.94045	2.59949e-243	-2.84822	1.74365e-226	-2.81444	1.92502e-214	-2.47502	2.68868e-147	5.86	5.4	5.79	5.83	6.65	6.77
BGI_novel_G000659	-1.73077	1.55289e-32	-1.23249	1.02923e-14	-1.42807	1.32503e-16	-1.34419	5.03213e-18	-1.38681	3.01864e-15	9.1	7.38	8.68	8.45	9.96	11.94
BGI_novel_G000750	-2.71698	5.66908e-204	-4.47327	0	-4.4196	0	-4.29406	0	-3.80258	0	15.84	16.31	17.11	10.87	7.85	10.68
BGI_novel_G000830	-3.69949	8.49549e-43	-2.81383	4.60791e-19	-2.4855	8.0878e-07	-3.59546	3.91323e-39	-5.14296	2.05886e-53	7.67	5.77	5.89	18.74	23.24	22.29
BGI_novel_G000853	-2.79356	1.53736e-49	-2.816	2.3656e-50	-1.72265	1.65613e-15	-3.87254	6.38081e-135	-3.08013	1.42583e-69	14.57	15.35	14.32	20.24	18.75	16.84
BGI_novel_G000906	-1.1457	2.99249e-242	-1.31337	0	-1.9628	0	-2.17642	0	-2.78836	0	34.92	34.65	34.69	58.84	55.29	55.34
Prupe.1G011400	-4.11963	0	-1.36865	4.33301e-31	-2.44865	6.17568e-49	-1.79957	5.10653e-61	-3.0268	1.5821e-87	7.86	7.67	7.46	8.54	8.62	9.41
Prupe.1G016100	-4.97752	3.14133e-98	-3.60186	4.74969e-33	-4.24958	1.38461e-41	-2.7814	5.20775e-16	-3.60996	2.5032e-24	60.46	55.32	52.98	28.29	26.37	29.16
Prupe.1G026400	-1.96629	2.04632e-98	-2.46509	4.89136e-182	-2.12435	3.62967e-194	-2.00574	4.95473e-104	-1.30522	2.83119e-55	17.09	17.09	15.4	11.43	11.64	12.5
Prupe.1G030700	-3.33166	3.35028e-161	-1.77925	2.64887e-28	-1.05741	3.04988e-09	-1.67774	8.44957e-25	-1.68289	2.14689e-24	5.61	5.41	5.93	5.75	5.47	5.31
Prupe.1G036700	-3.00983	1.06049e-93	-1.54937	2.14932e-16	-2.62296	3.10064e-38	-2.9592	2.31593e-89	-3.74918	9.44744e-109	5.21	5.12	5.14	8.38	8.27	8.18
Prupe.1G038100	-1.86216	2.58245e-76	-3.77665	0	-5.19315	5.71465e-239	-1.08267	3.6588e-21	-4.00227	7.28403e-93	47.49	46.96	54.99	10.28	11.3	10.59
Prupe.1G069300	-1.02963	3.66819e-08	-2.20375	6.00966e-44	-4.31787	8.48865e-58	-2.88145	1.83731e-93	-5.12092	3.5875e-103	7.03	5.58	5.88	8.25	9.34	8.48
Prupe.1G073300	-1.1263	1.2079e-62	-1.31065	3.22331e-89	-1.54056	2.14649e-83	-1.40707	1.66074e-106	-2.10821	4.30462e-183	119.04	107.68	111.18	113.12	140.75	115.43
Prupe.1G074900	-2.93692	4.36065e-191	-1.88674	4.4443e-56	-1.18331	6.81871e-18	-1.82183	1.28243e-51	-2.09996	3.54712e-69	6.79	6.16	6.01	8.39	8.8	8.7
Prupe.1G075000	-2.15062	1.32269e-57	-2.0587	4.69551e-51	-2.08208	2.65278e-54	-2.53008	6.78609e-90	-2.69402	1.17878e-107	7.87	7.52	7.7	10.17	9.95	10.48
Prupe.1G098900	-3.64708	5.04594e-07	-3.45954	6.59747e-06	-4.12673	0.00078318	-4.31957	8.41318e-11	-5.82719	6.62089e-09	6.06	6.15	5.84	10.78	8.37	9.09
Prupe.1G101900	-4.14631	6.13017e-33	-2.93598	6.92436e-12	-2.34912	4.42486e-06	-4.69544	6.62562e-50	-4.66307	8.71785e-38	6.72	6	8.45	14.18	12.09	14.42
Prupe.1G120200	-1.37672	0	-1.46505	0	-1.76942	0	-2.26832	0	-2.82923	0	73.52	78.42	76.22	153.58	155.89	152.2
Prupe.1G121000	-1.70725	1.00594e-291	-1.51582	5.07983e-216	-2.58082	3.84338e-244	-1.82585	0	-2.9321	0	38.58	33.31	40.5	200.94	213.81	202.27
Prupe.1G121100	-1.99911	4.7537e-48	-2.28438	5.32095e-68	-3.36958	2.12733e-75	-1.6318	5.47192e-29	-2.31778	1.58135e-25	7.01	7.61	6.74	16.83	15.21	16.45
Prupe.1G121200	-1.12328	6.8034e-14	-1.36759	8.69255e-21	-2.18196	3.23081e-25	-1.56771	7.63477e-29	-3.47544	5.14956e-92	19.93	17.79	19.76	19.59	20.25	17.33
Prupe.1G121300	-1.66911	4.21684e-76	-2.30953	6.72745e-179	-3.64059	1.64312e-161	-2.11651	1.63031e-141	-4.30529	4.44823e-276	25.73	26.08	26.8	29.63	36.27	32.47
Prupe.1G121700	-1.40981	2.80783e-26	-1.5106	1.79377e-30	-1.84775	6.43337e-35	-2.44543	2.43791e-106	-3.12508	4.45703e-145	16.97	14.64	13.13	19.76	19.35	18.16
Prupe.1G134700	-2.23541	0	-1.68187	0	-1.03789	1.60741e-119	-1.85643	0	-1.76534	0	16.31	17.38	16.32	16.37	16.78	16.46
Prupe.1G147300	-1.89589	0	-1.19154	4.2263e-258	-1.43949	0	-1.29129	0	-1.24258	2.68281e-270	414.09	423.03	421.89	394.17	375.37	426.9
Prupe.1G175700	-1.11779	2.08614e-36	-2.45603	3.59945e-265	-2.63136	0	-2.61302	0	-2.51857	2.45108e-269	26.96	26.78	29.83	24.67	25.5	23.15
Prupe.1G182200	-4.61873	0	-2.7162	1.01402e-256	-3.32087	1.33374e-165	-3.49741	0	-4.46936	0	401.55	388	434.56	303.24	346.6	396.35
Prupe.1G202000	-3.82111	7.75554e-11	-8.79834	7.3082e-263	-9.90784	5.59669e-172	-9.94019	0	-11.0883	0	11.44	10.48	11.32	20.74	19.86	18.83
Prupe.1G207700	-1.24258	1.69482e-84	-1.47182	4.23199e-127	-1.03833	2.78043e-63	-1.66001	1.04145e-172	-1.46613	2.66473e-140	17.14	16.65	23.49	34.51	29.62	33.42
Prupe.1G212400	-2.098	0	-1.44928	5.316e-148	-2.26016	9.0364e-224	-1.6092	3.69208e-193	-2.6132	0	109.81	115.57	114.49	205.43	195.22	192.95
Prupe.1G219000	-1.81419	1.40054e-39	-1.14748	1.24424e-13	-2.23889	1.3887e-30	-1.14421	9.09115e-14	-1.93311	1.07615e-20	6.79	8.03	9.47	6.11	5.89	5.15
Prupe.1G219800	-1.30702	2.87624e-227	-1.33017	1.65562e-237	-1.31319	5.30992e-192	-1.04996	1.28089e-135	-1.37162	2.22772e-208	47.31	48.14	47.23	45.18	43.44	44.24
Prupe.1G232400	-2.11857	0	-2.05224	0	-1.95745	0	-1.7773	0	-2.01504	0	62.32	60.94	58.54	47.26	52.77	50.73
Prupe.1G245100	-4.41913	0	-1.32738	2.36475e-46	-1.62748	1.21645e-57	-2.73667	0	-2.77538	3.98568e-237	20.35	20.85	19.84	44.18	47.16	46.87
Prupe.1G245600	-3.01211	4.03447e-50	-2.15543	5.06598e-20	-3.3073	2.75355e-19	-1.59239	4.02673e-10	-3.62193	1.43538e-24	23.08	17.27	17.08	9.98	10.37	8.8
Prupe.1G252100	-3.84607	0	-1.66118	0	-1.49107	0	-1.38336	0	-1.35587	0	189.52	188.25	186.42	140.71	145.09	141.68
Prupe.1G261500	-6.05956	8.52128e-305	-3.78081	2.21011e-55	-3.9527	9.16238e-40	-3.54351	1.82958e-45	-3.76229	2.9382e-33	6.69	5.49	6.49	9.75	11.07	8.54
Prupe.1G261800	-1.97421	0	-1.13071	0	-1.41994	0	-1.83092	0	-1.8739	0	85.14	79.92	79.14	109.94	109.68	109.01
Prupe.1G274200	-1.81046	0	-1.22312	6.94516e-255	-1.23343	3.7399e-210	-1.24863	6.13445e-269	-1.45146	2.42697e-305	18.48	18.63	18.23	18.73	20.44	21.89
Prupe.1G276700	-2.09577	0	-1.894	0	-2.30365	0	-3.74489	0	-4.24773	0	281	284.36	272.87	2050.29	2188.99	2116.85
Prupe.1G286200	-2.74802	0	-1.13903	1.55972e-65	-1.68439	3.32014e-118	-1.39468	9.26037e-107	-1.76879	9.51857e-131	61.49	56.83	54.37	63.61	67.2	68.07
Prupe.1G291100	-1.50144	1.21121e-60	-1.84883	5.90216e-102	-1.32016	1.91195e-44	-1.17571	3.94871e-34	-1.17598	2.87399e-33	9.86	8.68	9.38	11.78	9.95	10.44
Prupe.1G299900	-2.35406	0	-1.68465	4.98628e-198	-1.93775	2.28177e-209	-2.70062	0	-3.01762	0	41.76	39.81	42.85	67.64	63.22	66.29
Prupe.1G302400	-1.57799	1.70509e-25	-1.07091	9.44924e-11	-1.69517	8.25573e-14	-2.17369	1.24397e-56	-3.50696	1.16184e-94	31.47	23.33	25.15	68.04	61.92	57.11
Prupe.1G304200	-1.94012	0	-1.30561	4.3924e-152	-1.01593	7.53411e-82	-1.02588	1.96748e-86	-1.34982	1.9963e-156	15.06	14.27	14.17	14.55	15.09	15.34
Prupe.1G317700	-2.85549	2.62786e-59	-2.9249	2.81025e-63	-4.98967	1.06494e-64	-1.48247	1.62697e-11	-3.39655	2.61841e-18	45.34	49.62	43.34	6.33	7.4	7.98
Prupe.1G318800	-4.56135	5.08989e-174	-1.92466	4.92099e-14	-2.62149	6.11506e-23	-3.87562	2.47734e-100	-3.99099	3.74015e-78	18.43	18.59	15.48	64.3	55.04	60.55
Prupe.1G330600	-3.19998	1.54999e-94	-1.57984	1.32272e-14	-1.24132	6.93655e-12	-2.47745	2.81916e-45	-1.67208	2.16332e-22	7.36	6.74	7.08	6.66	6.51	6.6
Prupe.1G340100	-2.88422	0	-1.34631	5.15616e-49	-1.27873	1.00544e-32	-1.94825	2.93398e-124	-2.23185	4.23471e-129	15.31	14.89	15.7	13.92	14.27	13.69
Prupe.1G345300	-2.25621	0	-1.20072	3.65938e-149	-1.59642	1.57183e-233	-1.32769	6.54349e-191	-1.3754	2.77304e-157	31.29	28.98	29.09	19.39	19.76	19.3
Prupe.1G371600	-3.20546	0	-1.68304	0	-1.25945	0	-2.01297	0	-2.49167	0	189.6	196.65	193.04	385.61	387.68	389.66
Prupe.1G371800	-5.65469	0	-3.6496	7.93161e-276	-7.84006	6.12836e-158	-4.6614	0	-9.14601	0	11	11.71	12.84	27.7	28.3	26.6
Prupe.1G377000	-2.3801	1.13583e-75	-1.39908	7.38637e-20	-2.55075	3.24798e-44	-1.86878	4.29955e-40	-2.66307	1.0831e-48	7.88	8.2	6.91	6.43	5.61	7.7
Prupe.1G378900	-1.61013	2.40353e-247	-1.58464	7.00316e-238	-1.92232	2.19098e-242	-1.19935	1.25679e-120	-1.76468	4.081e-189	14.92	14.05	15.93	18.12	18.47	18.68
Prupe.1G398100	-4.67909	4.5169e-214	-3.20068	2.60672e-61	-3.36551	2.66377e-22	-3.07474	1.01706e-54	-3.62788	3.25242e-27	9.32	9	9.24	5.06	6.65	5.53
Prupe.1G398700	-1.7918	0	-1.8821	0	-1.91838	0	-2.46133	0	-2.86036	0	147.06	147.57	144.41	252.1	249.25	249.53
Prupe.1G406800	-2.44497	0	-1.29897	3.42926e-108	-1.02832	1.27727e-94	-1.97055	0	-1.07896	2.9392e-103	50.23	47.4	51.13	53.84	55.98	57.18
Prupe.1G412700	-1.51136	1.76749e-75	-1.45335	2.48685e-68	-1.01193	3.44008e-36	-1.5904	8.15797e-86	-1.22678	7.89871e-55	6.21	5.7	5.78	6.76	6.35	6.23
Prupe.1G416500	-6.99015	0	-3.95053	1.08931e-122	-3.84919	2.11764e-77	-3.96098	2.38196e-124	-4.42502	1.03679e-120	38.65	36.07	36.7	88.91	84.6	88.72
Prupe.1G422000	-1.97018	2.10447e-194	-1.17534	7.80776e-54	-2.01033	1.08287e-96	-1.2632	3.73548e-64	-2.00955	2.65172e-94	12.46	13.05	12.81	9.38	9.62	9.69
Prupe.1G446400	-4.99141	7.31539e-281	-2.8537	2.67713e-45	-4.72049	1.28625e-47	-4.2027	3.55708e-153	-6.12543	5.31488e-124	26.09	22.94	24.18	40.95	34.94	33.59
Prupe.1G446700	-1.40516	0	-1.67009	0	-2.58187	0	-1.84432	0	-2.17747	0	788.41	781.86	776.28	1028.79	1025.75	1039.61
Prupe.1G482000	-2.80377	0	-1.02667	1.48201e-100	-1.35578	1.602e-185	-2.01575	0	-2.14016	0	52.95	61.02	57.57	159.93	173.4	173.92
Prupe.1G485100	-1.39014	0	-1.34168	0	-1.93729	0	-1.56783	0	-2.04864	0	223.46	216.23	232.36	245.36	232.09	259.46
Prupe.1G491000	-1.22841	8.72138e-65	-1.23625	1.80968e-65	-2.8521	7.39636e-167	-1.78465	4.54896e-163	-3.68644	0	5.73	5.03	6.03	12.5	12.98	12.89
Prupe.1G491500	-1.83154	0	-1.21167	0	-1.10843	0	-1.24192	0	-1.33675	0	222.4	221.17	222.55	386.57	392.19	398.68
Prupe.1G498900	-2.8638	4.95133e-68	-1.42325	1.28104e-11	-3.48287	2.71146e-13	-1.25945	3.19276e-09	-3.96045	7.50141e-19	8.97	9.62	11	31.83	26.89	23.84
Prupe.1G522100	-1.78809	9.51995e-76	-1.75127	1.39196e-71	-3.25803	1.94676e-196	-1.12376	3.83925e-25	-2.66863	9.60088e-106	10.61	9.8	10.19	12.11	12.93	13.22
Prupe.1G527500	-1.32627	3.57675e-105	-1.73562	1.34941e-205	-1.3279	2.88448e-86	-1.66671	4.60188e-186	-1.77703	4.53845e-174	108.14	101.67	103.21	116.94	112.52	109.18
Prupe.1G527600	-1.27895	0	-1.78747	0	-1.49849	0	-1.80766	0	-2.12119	0	113.07	113.39	108.2	141.5	144.55	141.3
Prupe.1G527700	-1.67456	2.9283e-06	-1.74334	1.99895e-06	-1.86369	2.36919e-06	-1.97165	1.87582e-08	-2.19492	1.1305e-08	8.85	14.03	14.75	14.22	13.7	9.34
Prupe.1G527900	-3.10738	1.17982e-265	-3.27675	0	-2.16266	3.76141e-129	-3.31996	0	-2.8847	1.43167e-285	36.83	33.59	36.21	49.55	46.63	47.55
Prupe.1G556200	-2.37818	0	-1.84529	1.9472e-261	-2.45757	3.18781e-262	-1.40721	4.72973e-132	-2.61302	6.44613e-305	17.51	17.16	17.68	13.95	15	14.75
Prupe.1G557800	-4.90616	0	-1.89284	3.14668e-117	-2.38728	2.82522e-143	-2.91861	0	-3.93129	0	13.25	12.29	10.9	59.25	56.07	56.37
Prupe.1G572200	-3.90969	0	-2.16224	4.44098e-184	-3.86144	2.87125e-205	-2.21202	1.03452e-196	-5.1462	0	18.69	18.87	18.38	22.31	24.26	24.09
Prupe.1G573600	-4.32537	0	-1.46506	2.05469e-38	-2.19609	2.85698e-79	-1.82264	2.27253e-66	-3.11751	3.85394e-211	18.99	17.12	14.22	72.23	73.05	70.06
Prupe.2G002300	-2.81642	4.32056e-143	-2.73349	4.42854e-131	-3.12673	6.87765e-149	-2.46764	2.35206e-98	-2.82668	1.50074e-107	36.73	36.68	42.11	41.18	41.8	42.03
Prupe.2G005300	-3.15548	0	-4.54289	0	-6.00702	0	-5.98387	0	-7.13178	0	115.82	116.48	117.13	294.14	294.7	299.2
Prupe.2G009100	-1.49798	1.13403e-187	-1.20846	3.00597e-111	-2.17104	1.11214e-245	-1.46738	3.81618e-179	-2.33302	2.03315e-292	18.47	17.36	18.93	25	26.65	26.32
Prupe.2G010400	-2.28701	0	-1.01069	0	-1.24819	0	-1.96133	0	-1.75116	0	665.55	672.9	671.05	985.41	947.13	964.69
Prupe.2G022400	-2.13701	1.0853e-85	-4.42197	0	-2.97723	0	-4.12753	0	-3.14147	0	21.86	20.43	20.06	16.83	17.26	17.26
Prupe.2G022500	-2.10433	1.11927e-117	-3.08849	0	-3.59688	0	-4.3561	0	-5.07766	0	5.98	6.74	6.35	17.12	16.91	17.04
Prupe.2G023500	-1.24527	6.78896e-269	-1.94813	0	-1.93137	0	-1.7183	0	-1.88468	0	26.58	26.94	27.6	29.61	29.26	30.34
Prupe.2G023900	-2.09327	8.38686e-299	-1.80388	1.28919e-201	-2.31932	8.86765e-197	-2.43458	0	-3.54245	0	20.73	20.39	20.21	34.24	34.71	32.73
Prupe.2G026000	-1.64848	0	-1.44521	0	-1.99493	0	-1.88453	0	-2.39808	0	20.32	19	19.35	35.37	36.51	34.5
Prupe.2G029500	-1.85637	0	-1.31826	3.91822e-275	-1.44996	4.19582e-290	-1.43347	0	-1.51959	0	26.09	26.32	26.44	32.77	32.87	32.39
Prupe.2G038100	-1.51383	1.3044e-52	-1.18422	2.44814e-29	-1.15589	2.20553e-24	-1.08865	1.47135e-24	-1.39186	2.24676e-36	17.41	15.01	17.25	16.18	18.43	16.09
Prupe.2G055200	-5.37294	0	-3.87204	1.00051e-163	-3.89687	2.70931e-77	-4.40879	9.68092e-256	-5.81702	0	5.21	5.66	6.13	7.04	7.08	6.45
Prupe.2G057500	-2.36473	4.92918e-59	-4.22856	0	-5.01801	0	-1.96522	2.6276e-36	-2.23715	6.97881e-25	51.35	51.11	56.56	9.36	7.07	7.65
Prupe.2G060000	-1.13022	7.57154e-20	-1.31059	3.9461e-27	-1.64719	2.31986e-36	-3.01578	1.67681e-245	-3.32822	3.29291e-247	5.2	6.12	5.18	18.98	19.19	20.09
Prupe.2G078000	-1.02711	2.70474e-58	-1.92301	8.99011e-271	-1.68261	2.26441e-207	-2.06934	0	-1.92702	4.49089e-288	17.49	13.97	14.58	21.11	23.26	22.82
Prupe.2G078200	-1.03192	6.58359e-32	-2.37157	3.30815e-252	-2.46205	3.51828e-235	-2.34056	4.78615e-244	-2.56045	1.35361e-256	7.74	9.1	7.87	8.71	8.29	8.8
Prupe.2G085300	-1.25182	4.21081e-218	-2.28039	0	-3.27126	0	-2.7647	0	-3.60059	0	78.24	74.38	71.81	133.38	131.09	137.29
Prupe.2G091600	-3.12203	0	-1.83928	2.49236e-221	-2.32947	1.60252e-270	-1.22113	2.78232e-80	-2.44818	1.61144e-303	26.42	25.66	24.29	35.05	36.04	34.31
Prupe.2G111500	-2.14329	0	-1.38669	0	-1.60884	0	-1.76964	0	-2.06226	0	36.44	36.99	37.51	36.24	38.91	41.29
Prupe.2G117200	-3.17483	0	-1.58777	1.17977e-52	-1.74731	1.51173e-29	-1.60955	8.34831e-55	-2.52441	1.84478e-75	6.82	6.36	6.62	6.41	6.73	6.6
Prupe.2G118000	-3.66108	0	-2.12786	8.97437e-181	-2.30092	1.4121e-159	-2.38927	6.79041e-250	-2.67605	7.33965e-239	23.56	23	24.46	25.78	25.46	25.42
Prupe.2G131300	-2.42913	0	-1.25211	8.13612e-79	-1.7571	5.33874e-119	-1.15034	6.22277e-65	-1.65271	2.08404e-99	11.17	10.93	9.54	12.8	12.69	12.81
Prupe.2G147700	-2.71156	4.4357e-209	-1.96871	2.74018e-86	-2.53766	2.84381e-78	-2.5825	1.61514e-182	-3.74895	3.17393e-249	41.06	38.11	39.67	23.17	27.96	26.43
Prupe.2G149600	-2.72274	3.79501e-83	-2.08166	9.68045e-40	-3.04825	9.7342e-53	-1.69279	5.89707e-24	-3.38915	6.81239e-71	9.41	8.45	9.51	10.4	13.31	12.57
Prupe.2G161600	-1.38174	1.21174e-79	-1.26703	1.7163e-64	-1.09938	2.08465e-50	-1.63121	2.64386e-120	-1.52694	1.06012e-107	28.97	29.29	30.67	27.85	29.6	28.56
Prupe.2G182800	-1.23577	0	-1.11691	1.69952e-294	-1.19273	0	-1.20827	0	-1.21406	0	37.97	40.96	39.15	76.45	80.1	76.21
Prupe.2G190500	-3.09169	5.00155e-60	-3.09766	4.54952e-60	-1.88057	2.55282e-21	-3.32835	4.23708e-75	-2.75899	4.78129e-57	8.36	8.21	8.35	12.61	11.32	12.96
Prupe.2G203100	-1.59915	3.88448e-78	-1.3428	7.16757e-51	-1.49465	1.91444e-52	-1.12398	6.12855e-34	-1.52594	7.06552e-54	11.66	13.11	10.78	9.33	9.46	10.45
Prupe.2G231900	-2.58261	0	-1.17492	0	-1.04405	0	-1.89737	0	-1.42854	0	410.24	401.45	399.74	468.37	466.23	472.87
Prupe.2G243000	-1.11549	9.5151e-176	-1.094	6.14698e-168	-1.0014	1.83652e-137	-1.63093	0	-1.43469	0	51.72	49.65	49.82	52.87	50.75	51.39
Prupe.2G271100	-3.52267	1.68499e-243	-2.78472	7.44113e-119	-3.57253	2.64535e-73	-4.86062	0	-6.50786	0	43.52	41.15	36.37	125.57	113.8	122.5
Prupe.2G273300	-3.77828	0	-1.48502	1.01123e-25	-1.64941	4.26275e-21	-2.11286	1.84497e-62	-2.65398	2.23487e-70	11.3	10.15	10.01	14.45	15.76	16.62
Prupe.2G280800	-2.54825	0	-1.9348	0	-2.01124	0	-2.66261	0	-3.16502	0	303.34	309.32	296.38	415.31	438.67	459.54
Prupe.2G282100	-2.6096	0.000127193	-5.57019	6.35963e-36	-6.34396	8.99499e-63	-5.54196	1.53562e-35	-5.63676	1.21802e-38	8.62	6.83	5.54	5.44	6.74	5.22
Prupe.2G284000	-1.97981	0	-1.08893	9.28096e-100	-1.00583	1.03402e-76	-1.15506	3.93599e-115	-1.299	1.32132e-136	29.26	29.62	28.8	39.27	39.34	39.88
Prupe.2G288200	-1.83948	2.15445e-79	-1.67358	3.11424e-62	-1.93255	5.25821e-46	-2.07225	9.52248e-109	-2.66307	4.66561e-107	20.95	20.48	21.24	21.16	20.72	18.48
Prupe.2G314800	-2.82559	4.87399e-167	-1.61652	2.46803e-37	-2.28221	3.32098e-39	-1.74586	1.75689e-45	-2.91286	1.32713e-75	9.04	8.37	9.44	10.63	11.17	9.93
Prupe.2G319700	-4.00909	4.74645e-307	-1.50464	8.06907e-20	-1.66375	5.17663e-16	-2.23942	9.31865e-54	-2.43897	1.68143e-40	8.18	8.32	7.61	10.49	9.57	9.65
Prupe.3G001400	-3.78458	0	-2.44367	8.18529e-232	-3.23313	3.58618e-292	-1.48876	1.93231e-63	-1.97401	3.43341e-70	18.37	18.84	18.11	56.61	54.85	58.22
Prupe.3G014300	-3.34902	8.42819e-261	-1.7158	2.1105e-40	-1.78718	3.92523e-36	-1.68214	9.03721e-39	-1.91781	3.92879e-42	11.97	12.57	11.83	6.72	6.75	7.77
Prupe.3G027400	-1.32659	1.2099e-104	-1.46208	1.52563e-132	-1.12805	8.04461e-71	-1.51013	2.90202e-144	-1.66866	3.00145e-179	15.23	14.31	15	18.56	19.17	18.64
Prupe.3G031300	-2.47365	1.74099e-99	-1.58029	5.81804e-31	-2.63717	1.8348e-49	-2.25824	1.2527e-77	-3.44068	3.55211e-106	14.49	14.03	11.03	21.6	22.32	24.29
Prupe.3G032200	-3.99056	0	-1.73865	7.21312e-300	-2.78861	0	-3.23429	0	-3.20845	0	38.45	35.96	37.1	49.78	51.93	54.07
Prupe.3G040800	-3.13175	0	-1.68662	2.23377e-87	-1.93775	6.37931e-85	-2.25284	1.75823e-188	-2.63474	1.74687e-192	8.78	7.93	8.41	9.48	9.51	10.55
Prupe.3G041000	-1.43058	1.2503e-225	-1.08942	3.30308e-117	-1.68318	1.99962e-220	-1.10382	1.92898e-121	-1.68088	2.37156e-214	15.64	16.63	17.09	16.03	15.18	16.34
Prupe.3G049400	-3.25698	9.1511e-46	-3.73921	8.83182e-70	-5.0432	1.26443e-34	-4.11945	1.9132e-96	-6.94177	1.76521e-118	10.55	7.94	9.46	13.31	13.76	12.69
Prupe.3G063500	-5.3969	0	-1.55983	2.61792e-15	-6.11465	3.85977e-54	-1.68302	1.80788e-18	-5.93908	3.57265e-47	9.15	9.54	9.16	15.95	18.35	17.41
Prupe.3G070900	-3.16099	3.06056e-267	-2.88878	8.13552e-204	-4.7699	9.26541e-228	-4.84762	0	-5.60251	0	70.5	68.27	65.85	114.32	112.54	121.91
Prupe.3G085500	-1.85464	3.405e-92	-1.88207	1.45484e-95	-1.7537	4.05389e-88	-1.29199	4.38679e-38	-1.32133	4.60895e-43	19.84	18.62	18.92	12.79	12.21	12.37
Prupe.3G093100	-1.80296	0	-1.30035	0	-1.02345	0	-1.19753	0	-1.09506	0	40.37	42.05	43.07	65.66	66.16	69.17
Prupe.3G099300	-2.01806	5.33197e-118	-1.37255	1.05731e-44	-1.61934	1.05443e-38	-1.8818	1.47404e-98	-2.25808	6.46339e-89	7.22	6.67	7.28	8.64	9.8	10.82
Prupe.3G103200	-5.90857	2.50619e-45	-7.0199	1.8874e-91	-7.97472	3.65349e-30	-7.12037	8.42687e-98	-8.33242	5.79533e-36	21.06	18.43	20.26	20.45	21.29	17.48
Prupe.3G114100	-3.28404	0	-1.13364	5.02308e-29	-1.9035	1.02598e-69	-2.34062	3.34125e-179	-2.64171	2.16882e-166	13.1	13.67	12.25	16.89	18.21	18.68
Prupe.3G114200	-2.5384	0	-2.72023	0	-2.82126	0	-2.83425	0	-4.04067	0	608.98	622.18	612.38	368.72	379.85	339.08
Prupe.3G137000	-1.03336	0	-1.38637	0	-1.36739	0	-1.08209	0	-1.37114	0	148.94	143.84	150.24	146.55	143.81	150.91
Prupe.3G151300	-1.15326	3.89287e-182	-1.47837	0	-1.39807	2.61583e-196	-1.19969	4.4794e-201	-1.99685	0	67.93	67.28	67.9	44.73	47.4	47.18
Prupe.3G161300	-2.38016	0	-1.40547	1.06531e-99	-1.30763	7.75987e-80	-1.78975	4.98694e-184	-1.9463	5.55675e-212	12.84	13.45	13.01	17.03	18.31	16.6
Prupe.3G168100	-3.56989	0	-2.30421	0	-2.18461	1.05556e-293	-2.1438	0	-3.07963	0	98.06	98.21	99.92	74.58	79.32	76.22
Prupe.3G179400	-4.915	0	-2.08452	3.89379e-106	-2.94985	4.22867e-160	-4.32677	0	-5.4019	0	16	15.22	17.61	157.02	144.45	145.29
Prupe.3G201000	-3.09688	1.85629e-185	-1.17834	2.02665e-15	-1.18968	1.40142e-18	-1.51612	1.7349e-27	-1.1116	9.71092e-16	5.14	7.07	7.03	13.44	11.09	9.84
Prupe.3G204900	-3.69094	0	-2.66398	0	-3.90238	0	-4.19434	0	-5.15926	0	689.39	650.38	671.41	1075.4	1150.69	1121.28
Prupe.3G211600	-1.67482	0	-1.63748	0	-4.4464	0	-1.43901	0	-4.72443	0	118.34	111.45	115.27	145.28	144.36	147.5
Prupe.3G216100	-2.5167	1.07133e-119	-1.68867	1.44589e-41	-1.72234	1.15748e-23	-2.80352	5.6461e-164	-3.08028	2.79051e-110	10.12	11.08	11.55	27.59	25.19	26.8
Prupe.3G222400	-2.86161	5.65389e-225	-1.91879	3.38131e-74	-3.26619	7.67768e-126	-1.78994	2.01388e-62	-3.39562	1.35223e-138	27.13	29.33	29.02	25.98	27.9	26.41
Prupe.3G223200	-4.41602	0	-3.27195	8.04545e-165	-4.44865	8.15152e-90	-2.04755	7.73881e-44	-3.45086	1.75453e-38	60.13	61.13	56.59	18.99	16.7	17.56
Prupe.3G230200	-1.93227	2.84784e-129	-1.07428	5.24009e-31	-2.165	4.02361e-105	-1.71309	4.55881e-95	-2.35064	1.64288e-128	26.17	28.72	24.37	31.86	31.76	30.13
Prupe.3G230300	-2.9501	4.87386e-69	-3.40296	4.58621e-106	-2.507	1.02268e-54	-3.52373	6.07622e-119	-3.51593	1.44338e-145	81.96	77.13	86.33	101.57	87.18	82.55
Prupe.3G234200	-1.38012	1.6833e-35	-1.3773	5.68423e-35	-1.52385	7.24822e-36	-2.37377	8.83872e-142	-2.84102	2.33325e-183	31.58	27.91	27.53	67	62.79	59.58
Prupe.3G236100	-2.70504	8.04757e-265	-1.49685	8.27888e-55	-2.10147	4.11151e-96	-1.40718	1.56044e-47	-1.81375	6.49236e-64	8.19	7.91	7.49	9.95	9.92	9.75
Prupe.3G244900	-4.19077	0	-1.93798	3.13443e-72	-2.08706	1.39189e-31	-2.93525	3.34505e-231	-4.13882	3.07893e-233	6	6.35	6.02	11.85	12.24	11.41
Prupe.3G251100	-4.24676	0	-2.48195	2.68162e-79	-3.26058	3.57037e-68	-2.39192	5.6697e-72	-3.84262	9.84596e-112	16.49	15.74	15.92	6.24	6.6	6.61
Prupe.3G251200	-2.46859	1.82819e-269	-1.98448	3.15456e-148	-1.56906	3.09122e-65	-2.40045	2.32762e-250	-2.73041	1.47119e-281	13.77	13.41	13.23	16.3	16.43	17.26
Prupe.3G251500	-5.56536	0	-1.71017	1.52175e-26	-3.21984	6.28564e-71	-3.19914	8.62167e-148	-4.21147	2.81704e-164	6.37	7.79	6.93	32.04	35.24	36.32
Prupe.3G278800	-1.19907	5.39082e-47	-1.15036	2.1582e-42	-1.32137	2.1693e-46	-1.11897	4.30859e-40	-1.28238	2.95229e-42	7.83	7.55	7.37	7.94	8.34	9.09
Prupe.3G280800	-3.83691	0	-2.63574	3.95459e-152	-2.0468	1.96052e-81	-2.84999	6.06893e-192	-2.83691	7.91678e-198	25.11	22.51	24.08	18.86	19.76	18.98
Prupe.3G281800	-2.47962	8.3476e-115	-1.38278	9.31477e-26	-1.76149	1.13163e-31	-1.44479	8.33746e-29	-1.82969	5.4522e-34	8.15	8.93	9.19	6.55	5.26	6.19
Prupe.3G281900	-2.5936	8.65508e-149	-2.87082	4.52071e-200	-3.21112	1.69163e-147	-3.27402	1.39566e-299	-4.26116	0	12.58	13.34	13.29	18.35	18.86	20.04
Prupe.3G296100	-2.52059	0	-1.27176	0	-1.03241	1.85233e-166	-1.63265	0	-1.75815	0	161.23	152.92	155.5	125.89	128.4	129.51
Prupe.4G004600	-3.17711	0	-1.85112	1.38683e-118	-1.37013	2.03866e-39	-1.77025	3.71547e-106	-1.66541	9.10518e-62	31.43	29.65	30.75	28.95	27.14	26.92
Prupe.4G004800	-2.29745	3.70718e-168	-1.88651	4.55094e-99	-1.97472	1.70847e-68	-2.20418	9.58417e-151	-2.70555	6.3472e-159	29.92	30.09	32.61	45.3	43.09	43.17
Prupe.4G005800	-2.51818	1.18017e-16	-1.6487	2.67465e-06	-1.42773	1.38963e-06	-2.45777	1.55234e-15	-1.84384	9.93277e-11	8.71	5.66	6.18	11.36	11.53	6.41
Prupe.4G012800	-1.81387	8.26054e-294	-1.09324	1.67082e-84	-1.15072	1.28688e-75	-1.36441	5.25389e-144	-1.47655	2.02526e-134	40.72	40.46	39.78	26.67	25.06	27.16
Prupe.4G019000	-1.83588	5.36501e-56	-1.65652	5.15191e-43	-1.82148	6.45773e-62	-2.07175	1.05413e-76	-1.73905	8.48601e-54	5.55	6.89	7.08	5.89	5.46	5.28
Prupe.4G019700	-1.46449	3.66562e-06	-1.33453	5.66163e-05	-1.76416	9.22809e-05	-1.49019	3.27536e-06	-2.68035	7.0832e-11	16.95	22.25	16.55	8.51	7.51	7.15
Prupe.4G021100	-6.37995	0	-3.24264	1.73024e-34	-5.0902	7.04589e-19	-3.18712	4.64131e-33	-6.55949	1.50584e-47	9.95	10.81	11.4	10.69	10.31	10.39
Prupe.4G021400	-1.50435	1.3656e-99	-1.77847	7.38908e-152	-1.42667	9.95926e-91	-2.69728	0	-2.29445	1.35789e-304	98.89	102.95	102.67	171.14	170.71	160.38
Prupe.4G031900	-1.95267	2.64088e-178	-1.37488	2.05954e-73	-2.15386	3.22656e-104	-1.21349	6.80018e-55	-2.24643	4.88937e-114	8.37	7.86	8.86	5.25	6.06	5.68
Prupe.4G048200	-4.9513	3.23164e-212	-2.72186	3.84279e-31	-3.05273	5.53774e-32	-2.5039	4.52685e-25	-2.83647	1.97781e-25	16.85	16.3	15.91	31.39	33.33	35.1
Prupe.4G050800	-2.89791	0	-1.53202	0	-1.85189	0	-1.84317	0	-2.19274	0	808.52	815.05	800.71	1578.76	1511.43	1472.05
Prupe.4G052700	-3.63431	0	-1.86599	4.01465e-82	-3.2409	1.13993e-124	-1.95089	1.04989e-92	-4.4606	0	24.7	24.51	25.14	33.15	31.27	33.93
Prupe.4G069400	-2.89302	0	-1.83892	0	-2.52885	0	-1.60736	1.79728e-292	-2.42168	0	41.91	41.72	41.56	32.66	33.81	33.37
Prupe.4G078000	-3.03632	0	-1.15459	3.19485e-42	-1.84689	2.18276e-84	-1.76451	4.40659e-119	-2.53296	7.97163e-194	14.59	15.6	15.81	30.28	26.46	27.98
Prupe.4G079400	-1.84277	0	-1.77604	0	-3.20351	0	-1.46697	0	-3.38953	0	161.93	166.07	162.5	98.21	97.25	98.86
Prupe.4G092600	-4.36938	0	-3.98388	1.9131e-294	-6.6981	2.45531e-206	-3.89582	2.81289e-274	-6.65117	2.12962e-195	16.14	13.32	16.77	10.69	12.05	10.1
Prupe.4G105600	-5.27902	0	-1.85506	6.41584e-21	-3.12673	2.44595e-42	-3.61146	5.95389e-136	-4.46036	3.41859e-129	8.76	9.18	8.81	56.82	59.6	60.01
Prupe.4G116300	-3.91987	3.418e-56	-4.38379	2.9814e-81	-4.33729	4.60537e-35	-4.37507	3.8874e-81	-5.40993	8.35714e-75	10.79	13.24	10.81	17.92	22.07	16.34
Prupe.4G137000	-2.64708	2.06241e-11	-5.49057	2.04508e-109	-6.74144	1.67412e-54	-5.69279	1.74188e-126	-7.46918	6.00433e-83	26	26.82	24.21	11.39	9.11	10.25
Prupe.4G148800	-2.66609	0	-1.0588	3.05222e-34	-1.54176	5.16218e-38	-1.71313	5.52722e-109	-2.40873	7.33568e-118	18.39	19.07	18.89	21.65	23.17	21.84
Prupe.4G157900	-3.64579	0	-1.69578	5.42416e-83	-1.94975	1.05582e-94	-1.9138	6.75261e-114	-2.10866	8.57297e-114	17.79	18.6	17.82	11.24	11.48	11.25
Prupe.4G159700	-3.13427	7.08872e-58	-3.49737	1.45317e-80	-4.69232	1.59499e-64	-3.83415	9.96487e-109	-5.88868	1.76602e-147	17.79	14.26	13.77	37.27	37.96	33.92
Prupe.4G161200	-1.45263	8.55918e-79	-1.25161	6.32395e-55	-1.51739	1.49978e-43	-1.3536	1.41907e-66	-2.38567	1.90324e-137	12.36	10.73	10.24	15.63	16.46	15.71
Prupe.4G163100	-3.12479	1.68839e-210	-3.26215	1.30397e-240	-3.98314	6.25397e-136	-3.22673	1.59115e-233	-5.0206	1.62953e-299	12.7	11.8	11.9	11.48	10.88	11.51
Prupe.4G173200	-5.27855	0	-4.38811	9.95619e-171	-4.91564	1.74418e-135	-4.57431	1.88905e-198	-5.8142	7.98043e-251	18.28	16.54	17.96	14.61	15.1	15.11
Prupe.4G185900	-3.49173	1.39835e-234	-2.56738	3.33192e-93	-1.72856	1.23112e-53	-2.01551	1.23655e-48	-1.5903	1.16587e-42	39.6	35.58	38.78	20.4	19.59	18.91
Prupe.4G187700	-1.10458	0	-1.69155	0	-1.91224	0	-1.41535	0	-1.16332	0	171.75	170.01	172.73	136.55	141.73	146.64
Prupe.4G189500	-2.07217	1.38652e-17	-2.48404	2.11595e-27	-3.00991	6.73874e-15	-2.69022	2.34353e-34	-4.55481	2.46176e-51	6.21	7.14	5.66	5.36	5.9	6.06
Prupe.4G197800	-1.83691	8.21913e-103	-1.75233	6.6109e-91	-2.25633	9.51865e-116	-2.14862	3.12322e-156	-2.94102	3.99434e-241	12.45	12.22	13.05	17.97	17.65	17.43
Prupe.4G225800	-4.5913	0	-5.418	0	-7.57659	0	-5.51639	0	-7.96045	0	58.04	53.53	58.21	127.08	128.64	128.32
Prupe.4G241000	-2.42048	2.00671e-230	-1.61348	1.22631e-78	-1.49455	1.21968e-69	-1.26457	6.41129e-44	-1.43545	1.18595e-61	13.09	15.05	15.78	11.12	10.23	11.74
Prupe.4G242700	-1.30921	2.67517e-33	-1.26983	1.08548e-30	-1.71483	1.61201e-47	-1.74124	3.2296e-66	-2.08931	4.34514e-77	13.93	11.93	12.15	21.17	24.75	26.88
Prupe.4G248800	-1.40557	4.0987e-200	-1.12105	3.70767e-116	-1.46636	3.80589e-166	-1.53588	9.00022e-251	-1.95775	0	18.76	18.05	19.23	34.99	34.55	33.54
Prupe.4G255100	-2.81337	0	-2.37802	0	-2.21756	5.74434e-261	-3.50635	0	-3.17229	0	25.95	24.94	25.55	39.76	39.59	38.66
Prupe.4G257600	-2.53479	0	-1.6521	0	-3.71779	0	-1.89397	0	-3.39858	0	256.07	250.55	257.45	391.49	391.54	405.88
Prupe.4G260500	-1.72227	2.78196e-141	-1.24119	4.61899e-63	-1.00777	8.48495e-40	-1.79848	1.26865e-158	-1.70297	4.73149e-136	18.07	17.86	15.85	24.73	23.31	22.92
Prupe.4G268500	-1.58632	4.91855e-05	-5.24695	9.40589e-122	-4.62625	5.44455e-109	-5.45004	2.65641e-141	-4.83294	2.11309e-124	7.64	6.44	7.08	8.63	9.02	7.31
Prupe.4G272300	-2.34308	1.39354e-242	-1.69291	3.30103e-102	-1.43728	3.62994e-85	-1.7985	6.36675e-120	-1.55456	7.12161e-101	13.05	14.93	15.05	17.62	17.34	16.06
Prupe.4G285600	-2.82471	0	-1.43026	8.69095e-62	-1.35195	2.38363e-37	-1.71432	2.02328e-97	-2.1203	9.56164e-113	10.09	9.86	10.36	11.3	12.47	10.96
Prupe.5G019100	-3.79922	0	-1.5632	5.31681e-72	-1.20677	2.05232e-41	-1.90293	1.97039e-119	-1.67841	1.26788e-89	13.5	13.33	12.64	14.44	15.79	14.45
Prupe.5G044700	-4.65713	1.68406e-129	-3.54264	5.9048e-52	-7.29665	1.2445e-20	-3.04525	2.93605e-33	-8.07266	3.91106e-31	11.93	12.95	12.42	14.13	12.81	11.9
Prupe.5G050400	-1.36553	2.14225e-91	-2.69856	0	-1.247	2.31106e-183	-2.24764	0	-1.00759	2.59955e-108	114.14	101.96	101.96	65.06	71.33	77.13
Prupe.5G062300	-5.25476	0	-1.23541	2.74881e-45	-2.19389	3.04291e-149	-2.91062	0	-2.94244	0	18.1	17.54	15.5	41.44	41.77	39.9
Prupe.5G064300	-4.15638	0	-2.3349	8.49276e-90	-3.15176	2.42163e-134	-3.73155	0	-4.38869	0	19.68	18.9	20.37	22.3	24.26	25.65
Prupe.5G069400	-2.58023	3.97587e-124	-1.40376	8.09877e-26	-2.06939	1.00602e-39	-1.23065	2.08475e-19	-2.09404	5.07576e-40	9.36	7.63	8.62	8.38	9.02	8.89
Prupe.5G071900	-2.30019	3.37485e-237	-1.67929	4.81708e-103	-1.91806	1.37258e-118	-1.45504	1.60403e-72	-1.91038	1.50777e-114	12.71	11.52	11.81	9.31	9.73	9.13
Prupe.5G073700	-3.6397	0	-1.80844	1.71383e-193	-1.69073	1.35965e-142	-2.60984	0	-2.8807	0	33.62	32.4	32.29	52.85	53.28	52.93
Prupe.5G075800	-2.63233	5.87915e-224	-2.10193	9.56491e-120	-2.01316	2.51358e-99	-2.02241	1.54654e-108	-1.72958	1.55505e-65	28.63	27.74	28.72	18.13	18.5	22.27
Prupe.5G078900	-2.30688	0	-2.4177	0	-3.70823	0	-2.81068	0	-4.5095	0	58.31	53.66	56.05	124.95	130.49	130.18
Prupe.5G088100	-1.95105	5.35906e-294	-1.5424	1.64814e-160	-1.25677	2.2622e-93	-2.18364	0	-1.86435	3.00748e-244	38.3	40.09	40.09	81.51	89.25	85.45
Prupe.5G092600	-2.28532	4.06568e-86	-2.20427	7.36399e-78	-2.23664	2.36329e-89	-2.0141	1.28455e-61	-1.43438	1.53651e-28	7.02	6.62	6.11	7.23	8.36	8.54
Prupe.5G093100	-1.81319	1.012e-83	-2.35102	2.3565e-167	-2.92778	7.05005e-158	-3.2134	0	-3.91368	0	45.18	48.83	43.67	70.31	71.13	63.32
Prupe.5G099500	-3.43879	0	-2.31282	0	-3.44666	1.15326e-192	-2.26754	0	-5.4472	0	88.65	92.21	88.12	59.37	64.27	67.59
Prupe.5G123800	-8.03156	0	-4.60487	6.8854e-91	-4.21931	1.29254e-40	-6.6795	0	-7.38513	0	38.97	35.77	36.58	44.69	46.55	47.41
Prupe.5G126400	-1.38961	0	-1.2448	0	-1.52787	0	-1.43151	0	-1.47204	0	165.18	166.61	164.63	216.2	217.68	210.98
Prupe.5G138300	-2.49759	7.37058e-222	-1.36837	1.83979e-46	-2.18289	2.70454e-76	-1.24815	9.94231e-38	-2.33542	1.74887e-89	6.92	6.1	6.55	8.94	8.16	8.72
Prupe.5G144900	-6.25498	7.39588e-75	-3.76887	6.67513e-13	-2.23776	6.42473e-05	-4.86977	2.40667e-29	-4.70081	1.04695e-32	23.51	25.35	20.25	11.1	11.73	12.65
Prupe.5G145700	-2.35414	3.78474e-26	-2.69679	2.93214e-37	-3.50524	7.50116e-16	-1.74601	1.2086e-12	-4.46794	1.04695e-32	13.46	10.63	14.72	13.76	18.3	18.28
Prupe.5G148300	-2.1709	2.06753e-31	-1.61405	4.36152e-15	-2.65628	9.46563e-25	-1.42202	1.26265e-11	-2.33811	2.15921e-17	8.58	8.72	8.46	9.18	8.97	10.25
Prupe.5G148500	-4.92	0	-2.17136	3.35282e-170	-3.8153	5.69189e-237	-4.20609	0	-5.63134	0	26.6	23.79	27.09	189.27	192.31	190.31
Prupe.5G164500	-3.07592	4.18023e-113	-3.19386	1.15097e-126	-3.1113	1.05481e-76	-2.25297	6.17241e-47	-3.52053	1.49778e-109	18.12	16.84	16.18	11.05	11.1	12.16
Prupe.5G164700	-3.36329	3.90823e-110	-2.20544	6.60566e-33	-1.08683	3.88e-06	-3.26965	2.81981e-101	-2.87708	8.39671e-56	12.58	13.85	13.06	8.17	8.32	8.53
Prupe.5G165000	-2.13945	4.59038e-144	-1.9045	1.13884e-105	-1.90952	3.06077e-104	-3.10638	0	-3.25493	0	8.61	8.68	10.17	26.04	25.37	27.4
Prupe.5G165500	-2.16824	3.07625e-210	-1.51604	4.14285e-83	-3.30403	1.2122e-101	-1.99274	2.51475e-168	-4.76314	0	63.4	66.62	66.13	90.78	98.61	93.29
Prupe.5G174600	-2.69429	8.39272e-75	-1.34858	3.60438e-13	-1.50524	3.38859e-12	-1.79995	7.71943e-26	-2.28803	2.90599e-32	9.18	9.25	10.06	8.13	7.08	6.47
Prupe.5G183800	-5.01943	0	-2.33051	4.36499e-62	-1.36161	2.02294e-13	-3.88195	1.30226e-289	-3.66231	1.72112e-181	10.55	9.64	10.29	13.9	13.62	14.28
Prupe.5G191000	-2.38652	2.5357e-14	-2.54783	1.76816e-16	-1.05204	0.000127907	-2.402	2.07568e-14	-1.76408	1.34209e-11	13.33	10.96	12.12	15.75	15.64	15.49
Prupe.5G199500	-1.17184	2.17355e-42	-1.47719	6.44554e-73	-1.70146	1.56452e-92	-2.27491	2.78217e-225	-2.4193	4.20142e-231	10.95	10.96	10.81	18.49	16.19	17.51
Prupe.5G203900	-5.4563	0	-1.81695	6.84626e-55	-1.83628	3.40708e-26	-2.32085	1.64025e-105	-2.53707	1.8085e-59	26.54	26.65	24.94	18.29	19.72	20.36
Prupe.5G212300	-2.06027	4.35185e-85	-1.00637	1.69253e-15	-1.19657	4.11e-17	-1.33022	6.34688e-29	-1.60765	9.79493e-33	9.23	9.12	8.84	9.05	9.33	8.21
Prupe.5G216400	-4.99103	0	-2.55314	1.70747e-82	-3.26423	2.09184e-68	-3.05654	3.54556e-140	-4.70447	8.94407e-224	9.22	9.99	9.66	7.91	8.19	7.81
Prupe.5G217700	-3.85918	2.53073e-258	-2.46617	1.79559e-66	-2.43707	1.89181e-44	-3.54991	7.21101e-198	-4.01793	8.39417e-197	14.49	14.92	11.71	19.12	22.05	21.14
Prupe.5G218800	-2.42928	0	-1.83318	0	-1.64857	0	-2.51498	0	-2.4055	0	253.05	249.01	239.66	303.5	295.72	306.08
Prupe.5G219700	-1.40676	0	-1.08705	0	-1.11089	9.50841e-305	-1.09474	0	-1.26607	0	87.39	84.62	83.76	50.55	52.47	53.83
Prupe.5G221000	-2.30075	3.2474e-85	-2.85511	4.21078e-157	-2.79676	1.19484e-105	-2.90677	2.11055e-166	-3.13603	4.8674e-145	17.64	15.65	16.88	25.12	26.58	25.64
Prupe.5G231000	-4.07463	0	-1.67745	3.23156e-53	-1.95244	2.74554e-26	-3.97483	0	-5.46364	0	14.15	12.5	15.09	18.29	21.25	18.51
Prupe.6G006200	-4.89046	0	-1.78175	3.44879e-58	-1.9329	1.54444e-30	-1.46607	2.69811e-36	-2.64155	1.69709e-68	9.5	9.52	9.99	26.12	25.66	25.75
Prupe.6G009900	-4.79147	4.0279e-124	-2.42952	1.33814e-15	-5.03362	3.51336e-18	-3.49951	9.54528e-44	-6.31593	8.28207e-41	6.07	6.54	5.58	19.33	18.56	17.05
Prupe.6G012100	-2.39067	0	-2.51637	0	-3.07736	0	-3.00282	0	-4.22545	0	341.31	345.04	335.87	317.86	308.55	311.83
Prupe.6G017500	-1.35712	9.42504e-69	-1.11971	1.38389e-43	-1.25596	2.6215e-52	-1.39803	5.56749e-74	-1.40358	1.54155e-66	5.07	6.22	5.55	6.06	5.65	5.74
Prupe.6G042600	-1.1346	5.29599e-55	-2.01806	2.78931e-229	-2.835	0	-1.95943	8.66927e-213	-2.91469	0	22.91	22.94	21.28	48.55	47.12	48.19
Prupe.6G054700	-4.50931	1.19307e-164	-3.54732	5.58264e-74	-2.47928	4.9115e-20	-2.48744	1.29779e-26	-1.97086	2.75461e-11	34.41	32.53	33.43	9.64	10.48	8.9
Prupe.6G054800	-2.5099	0	-2.28645	0	-5.21631	0	-1.30275	0	-4.64393	0	265.98	254.77	263.19	230.97	235.66	229.32
Prupe.6G060300	-3.90471	1.9721e-77	-1.54084	7.2011e-07	-1.88572	6.96718e-07	-2.76856	1.34877e-27	-3.5904	1.06846e-33	9.04	8.52	7.89	15.37	19.49	15.11
Prupe.6G063000	-6.03333	0	-2.39181	0	-3.8726	0	-3.19791	0	-6.14887	0	129.21	128.92	120.49	188.44	193.4	184.15
Prupe.6G063100	-2.90252	0	-1.18482	3.51139e-39	-1.91851	1.50754e-77	-1.96584	1.90274e-137	-2.75783	8.77688e-206	8.63	8.73	9.49	18.14	20.11	17.86
Prupe.6G068300	-4.24392	0	-1.71756	3.44565e-105	-4.11504	4.61527e-124	-1.76439	3.11048e-113	-4.85396	4.148e-216	721.21	735.33	728.26	316.02	292.28	314.92
Prupe.6G070200	-6.43023	1.27037e-304	-2.947	8.54877e-21	-8.0494	1.90737e-31	-4.8923	2.70256e-105	-9.48368	1.41248e-67	6.39	6.34	5.45	10.54	9.79	11.3
Prupe.6G101600	-3.67733	0	-2.61837	6.99219e-153	-4.79348	3.88859e-110	-3.02434	7.75035e-235	-6.00099	2.2636e-253	27.86	26.99	32.83	32.38	33.09	32.43
Prupe.6G101900	-1.33621	1.31446e-09	-1.30335	8.09705e-09	-3.61215	3.72359e-12	-1.39192	2.84015e-10	-5.09216	5.17417e-35	8.03	8.26	7.4	9.14	6.86	8.63
Prupe.6G104400	-3.41276	0	-2.67745	9.44137e-172	-2.59574	1.8745e-95	-2.01472	1.13665e-78	-2.68442	1.4276e-102	11.92	11.38	10.79	9.73	9.82	9.64
Prupe.6G106100	-1.9896	2.07397e-130	-1.39455	3.78909e-53	-1.6541	7.16556e-52	-1.84604	1.38333e-107	-2.43291	6.07902e-140	12.41	12.98	12.78	11.69	14.33	13.65
Prupe.6G110000	-3.31308	2.75246e-35	-1.39133	0.000117343	-1.53877	4.85321e-05	-2.78081	1.98869e-21	-2.44449	1.32993e-12	9.92	8.35	10.76	12.01	8.97	9.78
Prupe.6G118800	-1.18687	0	-2.08994	0	-1.56386	0	-1.97488	0	-1.63462	0	179.44	183.21	174.19	305.99	306.44	308.86
Prupe.6G139900	-1.05183	1.25379e-62	-1.12774	3.04146e-73	-1.43507	7.65338e-99	-1.45311	3.02656e-135	-2.14154	6.74309e-271	12.13	13.54	11.84	13.95	12.63	13.07
Prupe.6G150900	-2.14509	0	-1.37785	1.59977e-239	-1.24507	2.43792e-167	-1.05682	1.90595e-127	-1.18183	3.46206e-144	19.44	19.39	20.63	15.38	15.38	15.39
Prupe.6G195500	-2.01998	2.34027e-73	-1.74712	2.62224e-50	-1.82807	2.98818e-45	-2.23495	2.50525e-96	-2.72327	9.14508e-130	12.55	11.73	12.22	11.8	13.3	11.88
Prupe.6G200500	-6.6378	2.04533e-282	-2.79396	7.13897e-15	-2.18331	1.82908e-10	-5.39486	5.42826e-123	-3.68035	1.20441e-41	14.54	12.02	12.9	8.5	6.75	7.37
Prupe.6G202700	-1.95176	0	-1.02986	4.97739e-138	-1.38699	2.25401e-213	-1.13948	8.3978e-176	-1.51533	2.27488e-259	24.66	24.03	25.41	32.73	32.96	34.15
Prupe.6G209900	-3.22679	0	-1.60389	4.67008e-108	-2.25425	9.93398e-264	-2.37158	2.50007e-306	-2.02534	2.22763e-192	60.87	57.41	62.78	108.07	112.72	98.47
Prupe.6G210900	-1.28289	0	-2.13396	0	-1.49137	0	-2.02249	0	-2.19923	0	39.22	37.17	41.78	29.04	28.42	25.39
Prupe.6G217300	-2.45172	1.40086e-198	-1.88717	1.06393e-97	-2.05366	9.2893e-80	-2.2293	3.45073e-153	-2.06062	1.42862e-78	27.9	29.54	32.31	32.2	32.45	33.27
Prupe.6G223000	-1.22437	1.41843e-67	-2.50201	0	-5.11623	0	-2.96471	0	-6.21619	0	20.56	19.57	20.08	53.49	52.41	49.84
Prupe.6G231700	-1.20224	0	-1.57801	0	-1.29779	0	-1.43334	0	-1.55615	0	213.08	212.67	217.23	226.64	222.88	228.11
Prupe.6G231800	-1.96886	0	-1.41355	5.10746e-164	-1.4097	4.96455e-106	-2.04439	0	-2.57131	0	23.43	22.72	22.45	19.41	20.74	21.13
Prupe.6G233400	-8.24454	0	-2.1842	2.23935e-07	-2.54285	8.9924e-05	-5.77724	2.32872e-140	-6.68546	4.76199e-84	6.2	6.97	7.1	10.83	10.38	11.4
Prupe.6G239300	-3.0919	3.83965e-177	-2.09773	5.70972e-59	-1.70871	1.35931e-30	-2.61447	1.37675e-108	-2.64812	8.10377e-95	11.14	10.72	11.6	20.56	19.15	22.05
Prupe.6G255100	-2.69749	0	-1.73549	0	-2.22799	0	-2.69151	0	-3.45617	0	1026.06	1105.69	1091.24	2636.6	2701.18	2673.89
Prupe.6G275700	-2.17713	0	-1.34807	2.7645e-172	-1.54196	1.85378e-172	-1.69525	3.54578e-307	-1.96496	0	34.76	33.14	32.34	40.02	39.8	41.78
Prupe.6G277200	-1.74194	1.22413e-123	-1.71198	3.61084e-118	-1.45785	2.81521e-94	-2.24005	3.92056e-242	-1.38756	1.32558e-81	31.01	29.85	30.75	41.61	42.11	39.43
Prupe.6G281100	-3.04411	0	-1.0762	5.02013e-32	-1.23811	5.71716e-42	-1.48203	3.08782e-68	-1.44843	2.01757e-59	10.03	10.61	10.02	6.95	7.46	7.26
Prupe.6G283800	-5.31975	3.5287e-173	-2.27385	1.25232e-12	-2.23776	6.42473e-05	-4.59653	6.90158e-102	-5.43371	6.77224e-55	7.47	7.1	5.87	13.99	14.99	14.41
Prupe.6G286700	-2.37578	5.0415e-50	-2.39541	7.97679e-51	-4.20625	1.1193e-65	-2.44798	2.72948e-54	-4.23756	9.32904e-66	9.35	8.99	8.87	6.04	6.24	6.96
Prupe.6G290700	-1.97661	0	-2.24203	0	-2.62228	0	-3.76146	0	-4.95897	0	157.2	158.59	159.19	374.05	374.02	393.7
Prupe.6G303100	-2.34067	0	-1.10472	1.25286e-153	-2.5246	1.07646e-274	-2.16702	0	-3.94093	0	146.39	142.45	144.44	114.03	116.67	113.13
Prupe.6G303300	-2.56014	6.53496e-228	-3.12262	0	-1.44267	1.07863e-68	-3.52789	0	-2.09272	1.44175e-173	19.04	19.53	18.48	24.78	24.44	25.88
Prupe.6G312400	-3.58705	0	-3.05099	0	-2.37115	2.77819e-299	-3.03978	0	-2.24669	2.21988e-251	33.54	34.71	34.8	15.92	15.35	17.01
Prupe.6G319600	-1.91726	0	-1.43811	0	-2.65911	0	-1.47109	0	-3.08682	0	2017.41	1988.99	2013.6	2896.2	2790.62	2875.61
Prupe.6G321700	-1.68497	2.60702e-116	-1.61362	3.93851e-104	-1.35847	6.45403e-79	-1.26955	2.30592e-58	-1.07893	5.71758e-45	10.37	9.63	9.28	7.39	8.86	7.58
Prupe.6G336000	-3.5883	0	-1.24168	3.37317e-58	-2.00887	5.50212e-130	-1.90284	3.3219e-169	-2.47401	1.44326e-224	98.71	102.15	99.01	153	148.81	147.31
Prupe.6G341900	-2.68409	1.23239e-246	-1.49852	2.03538e-52	-2.27237	2.98624e-95	-1.84531	7.48583e-89	-2.29017	5.39044e-95	13.61	12.68	12.22	11.89	13.04	12.4
Prupe.6G343800	-1.68639	0	-1.61072	0	-2.57171	0	-1.94216	0	-2.8706	0	325.07	322.32	320.44	631.7	619.09	640.68
Prupe.6G350700	-2.69556	0	-1.58059	0	-1.15011	6.46263e-180	-1.86894	0	-1.31018	3.90439e-240	40.5	38.06	40.67	38.33	38.87	38.36
Prupe.6G360500	-1.75786	9.18679e-179	-1.04975	3.71225e-51	-1.53305	3.8466e-76	-2.06756	1.2026e-275	-2.88597	0	39.46	38.25	39.03	69.35	56.57	60.48
Prupe.7G013700	-1.78338	2.38807e-216	-1.3143	6.84115e-101	-1.14421	4.42748e-72	-1.538	3.95801e-149	-1.52324	3.21634e-140	70.31	73.61	76.73	79.29	85.37	81.24
Prupe.7G015400	-1.72108	5.7161e-13	-3.08466	7.62214e-58	-3.42371	4.80656e-62	-3.23007	7.89253e-67	-3.74512	2.23496e-80	5.84	6.25	5.87	5.78	5.67	5.25
Prupe.7G060800	-1.69933	4.91154e-244	-1.4663	2.41792e-168	-1.09307	2.25262e-78	-2.42946	0	-2.06167	0	102.43	107.02	115.88	184.35	181.21	163.63
Prupe.7G062200	-2.04657	0	-1.44452	4.83595e-145	-2.14075	4.36674e-176	-1.65477	7.0825e-205	-2.62016	1.7385e-302	22.19	22.85	22.88	29.02	28.24	30.23
Prupe.7G079300	-2.89076	1.71781e-125	-4.209	0	-5.37263	0	-3.69362	1.61142e-269	-5.74992	0	25.48	25.04	24.5	30.42	30.41	32.66
Prupe.7G081600	-3.32161	0	-2.10049	1.06376e-131	-2.40353	3.62547e-105	-1.979	7.08048e-113	-2.76807	1.64911e-153	21.27	20.95	20.81	33.49	32.43	30.77
Prupe.7G103000	-2.37658	4.79636e-286	-2.34672	1.38664e-276	-2.88547	1.14258e-240	-3.61169	0	-3.77326	0	16.03	16.29	17.62	29.65	29.39	28.23
Prupe.7G103900	-4.00609	0	-1.18196	3.16729e-19	-1.24855	3.5142e-21	-1.77884	8.58027e-51	-1.5804	1.16832e-35	10.22	10.24	9.9	8.34	7.25	7.88
Prupe.7G105200	-4.28896	2.74044e-84	-3.23495	3.02105e-34	-2.89639	7.75586e-20	-3.24918	5.50131e-35	-2.37555	9.6827e-12	38.47	46.16	46.58	38.01	36.44	37.1
Prupe.7G107400	-2.465	9.74243e-206	-2.86887	0	-5.20125	2.2753e-166	-1.72399	2.05502e-79	-4.70886	8.26406e-113	20.11	18.32	20.1	13.57	14.37	12.99
Prupe.7G107600	-1.76723	8.57984e-113	-1.77423	8.3231e-114	-3.40997	1.81539e-118	-1.16671	2.58128e-41	-3.19177	2.62743e-94	7.77	8.04	8.73	7.75	7.67	7.99
Prupe.7G107700	-2.44572	6.14749e-151	-2.9225	4.16479e-253	-5.51575	2.98586e-129	-2.84055	1.7959e-233	-6.52239	3.80832e-248	15.71	16.63	17.25	20.02	21.08	19.68
Prupe.7G119400	-3.90771	7.23933e-172	-3.12067	2.35181e-84	-4.89697	8.55543e-68	-2.76108	3.31831e-59	-4.94147	2.1636e-68	10.86	10.2	11.79	10.59	11.56	10.84
Prupe.7G121400	-2.78513	1.20414e-299	-1.70614	9.15173e-79	-2.90959	1.28328e-96	-1.32182	1.58691e-42	-2.40427	6.49657e-55	25.99	23.31	25.89	11.55	12.52	10.35
Prupe.7G126100	-2.57858	0	-1.89289	0	-1.75315	5.15545e-188	-2.2134	0	-2.47819	0	93.12	102.69	96.77	128.02	123.91	127.27
Prupe.7G135000	-3.38535	6.83518e-203	-1.74334	5.82442e-32	-1.63902	4.0826e-22	-2.93958	2.14869e-132	-2.976	6.66955e-105	15.34	15.03	13.81	38.22	36.19	33.79
Prupe.7G144800	-4.08841	1.98336e-86	-3.13836	1.48458e-37	-1.24391	7.38516e-09	-5.04755	4.77942e-182	-3.13255	2.33781e-84	24.65	33.52	27.35	75.55	66.87	62.76
Prupe.7G145900	-5.68717	0	-1.90619	2.52667e-61	-4.66079	1.37072e-154	-3.5938	0	-5.93217	0	25.34	25.92	25.22	97.71	98.25	98.33
Prupe.7G150900	-1.49794	6.57076e-66	-1.63293	2.77874e-81	-1.47836	9.58238e-43	-1.44884	7.22845e-61	-2.39655	1.14862e-145	8.98	9.34	9.7	12.98	13.29	14.02
Prupe.7G158900	-3.2721	2.76538e-290	-1.31517	1.95958e-25	-2.44526	9.66306e-42	-1.85232	1.02176e-58	-2.58858	1.11493e-47	7.29	6.37	6.86	6.12	5.32	6.18
Prupe.7G159000	-3.84611	0	-1.86328	5.07638e-43	-1.09148	3.11188e-13	-3.22556	6.2745e-201	-2.26531	3.91142e-73	6.47	6.93	6.28	13.56	13.44	12.67
Prupe.7G161200	-1.54004	1.80827e-75	-1.56401	3.82916e-78	-2.4337	1.36983e-76	-1.18605	1.34499e-40	-2.79468	9.1502e-111	29.28	32.24	28.23	57.99	54.43	56.15
Prupe.7G164300	-2.15609	7.25203e-215	-1.225	1.29977e-51	-1.21577	4.01968e-41	-1.81993	1.26075e-137	-2.09107	5.41788e-155	15.06	13.87	14.71	18.82	20.36	21.35
Prupe.7G169200	-4.47082	0	-1.55854	6.90114e-114	-1.305	8.89405e-52	-2.24288	2.05061e-297	-2.63763	0	32.91	32.84	35.07	50.85	53.06	50.13
Prupe.7G175400	-2.51709	0	-1.50605	1.23158e-259	-1.99194	0	-2.07575	0	-2.71134	0	24.36	23.18	23.69	35.5	34.81	35.94
Prupe.7G183000	-2.05201	4.81074e-208	-2.23215	7.10159e-262	-3.82389	0	-1.00341	2.29881e-36	-2.68877	4.59047e-124	7.34	7.27	7.27	7.4	7.19	7.12
Prupe.7G204200	-1.24369	8.30618e-66	-3.32433	0	-3.49351	0	-2.38277	0	-3.07576	0	38.99	39.31	40.25	34.02	34.27	35.84
Prupe.7G205500	-6.78157	0	-2.55164	8.85914e-28	-2.89672	2.70695e-26	-2.50444	1.10135e-26	-3.20249	3.20593e-34	11.4	9.13	10.12	6.64	6.91	7.64
Prupe.7G210500	-3.31957	5.62784e-275	-2.47806	1.23161e-115	-2.47387	6.51922e-48	-3.8154	0	-5.22961	0	12.9	11.73	12.1	47.28	48.9	50.24
Prupe.7G220100	-3.52906	0	-1.4452	1.90734e-36	-2.59787	8.7754e-56	-1.59383	1.66518e-46	-3.17992	3.16529e-98	24.38	23.21	23.79	19.64	19.96	18.77
Prupe.7G220500	-1.28246	4.69327e-19	-1.72325	2.17531e-37	-1.28427	6.24853e-17	-1.68386	1.31152e-35	-1.45795	5.84545e-22	25.77	22.44	25.66	42.9	43.15	42.03
Prupe.7G220600	-1.01797	6.08849e-190	-1.70403	0	-1.44626	0	-1.48937	0	-1.59978	0	86.55	93.97	91.05	169.88	169.68	157.94
Prupe.7G225600	-5.79128	0	-2.63713	0	-3.50079	0	-4.38243	0	-4.94154	0	88.23	83.18	85.33	211.92	211.19	205.3
Prupe.7G225800	-1.28929	1.22343e-34	-1.61788	3.77965e-59	-2.72619	1.7847e-72	-1.54659	2.86763e-53	-3.42851	9.46307e-141	9.94	9.76	9.79	12.36	14.38	11.1
Prupe.7G231100	-1.01124	1.81703e-43	-2.04689	1.52321e-244	-1.48073	9.96135e-106	-1.40205	2.73855e-93	-1.75443	3.09463e-158	30.56	29.74	29.36	27.34	27.14	26.27
Prupe.7G237500	-2.74634	0	-1.51813	2.48792e-108	-1.95144	1.02082e-100	-2.14723	4.66047e-268	-2.92625	9.42628e-306	126.39	132.96	129.71	152.74	144.84	143.31
Prupe.7G248400	-1.54297	2.03868e-220	-1.52711	5.15877e-215	-1.74381	8.46038e-190	-3.67595	0	-4.09786	0	28.49	28.53	28.32	98.01	96.24	95.15
Prupe.7G255500	-4.00109	6.81548e-135	-2.6562	1.5018e-38	-3.72296	8.23035e-50	-4.08687	1.98142e-145	-5.58481	3.10969e-202	11.17	10.38	9.65	65.21	71.37	64.78
Prupe.7G262300	-1.27464	1.56818e-59	-1.26801	1.689e-58	-2.38325	3.04268e-109	-1.60596	1.32593e-104	-2.86198	3.66495e-180	10.31	10.08	9.81	11.93	12.59	12.67
Prupe.7G264000	-5.10884	0	-2.68262	2.94388e-52	-2.46191	5.50876e-33	-3.06287	2.76595e-77	-3.62101	9.33178e-100	5.18	5.7	6.54	16.06	15.79	13.52
Prupe.8G041200	-7.58829	0	-3.35102	1.58652e-70	-4.79834	1.79133e-49	-4.94715	1.54508e-263	-7.56847	3.55483e-303	14.12	15.28	15.63	16.58	16.96	16.49
Prupe.8G041600	-4.1514	0	-1.47369	0	-1.09865	6.41371e-127	-2.0594	0	-2.02866	0	189.13	186.25	184.65	165.79	160.23	165.91
Prupe.8G048100	-2.94564	0	-2.35718	0	-1.81333	0	-1.48064	4.46739e-240	-1.38681	4.61442e-178	153.84	157.05	155.18	65.06	64.31	63.57
Prupe.8G064100	-5.2113	0	-2.17999	2.75779e-106	-1.36926	8.30799e-34	-2.41613	9.44188e-142	-3.51165	0	110.28	111.83	107.45	57.5	55.11	57.31
Prupe.8G074200	-1.34455	2.66951e-48	-1.26319	2.07729e-41	-1.58095	1.459e-53	-1.52487	2.05049e-65	-1.93231	6.46877e-87	5.98	5.79	5.75	9.4	9.92	10.15
Prupe.8G095700	-3.18217	0	-1.80901	0	-1.24048	0	-2.24552	0	-2.00053	0	174.94	167.77	169.79	172.74	182.06	181.34
Prupe.8G097500	-2.26857	3.27599e-95	-1.37066	1.08966e-26	-1.82134	6.37681e-47	-1.14298	5.28157e-18	-1.18369	7.92214e-17	6.29	5.77	5.95	6.82	6.8	5.84
Prupe.8G098000	-1.45042	0	-1.36019	0	-1.38577	0	-1.33588	0	-1.87458	0	108.59	106.67	101.62	118.82	117.44	120.04
Prupe.8G099700	-3.76229	2.35134e-240	-2.69707	1.34762e-86	-2.22773	2.19352e-43	-2.69059	1.85456e-86	-2.65357	2.02124e-68	9.99	10.01	12.01	16.86	20.02	20.07
Prupe.8G099800	-3.02756	1.95382e-56	-3.3785	3.27863e-78	-3.90914	1.30504e-51	-1.11759	1.17457e-05	-1.87299	2.1017e-07	14.31	11.48	16.52	7.68	11.88	8.94
Prupe.8G101500	-1.93394	3.50738e-301	-2.76696	0	-4.11282	0	-2.08505	0	-3.67795	0	48.08	49.37	51.38	66.68	71.72	73.66
Prupe.8G101600	-1.74439	4.8754e-27	-1.70207	3.98395e-25	-1.26316	4.03954e-14	-2.18954	6.87419e-48	-1.99337	5.03533e-40	24.04	30.64	34.34	37.43	36.78	38.78
Prupe.8G109000	-1.19169	4.94053e-222	-2.24238	0	-2.4241	0	-1.60295	0	-2.54383	0	31.89	31.69	32.78	19.94	21.08	21.73
Prupe.8G112900	-4.79615	0	-2.10893	7.96923e-28	-2.29665	6.88698e-23	-2.76539	2.09644e-58	-3.27387	3.9138e-60	9.84	9.48	10.36	28.37	24.88	24.75
Prupe.8G114500	-3.06039	0	-1.2519	1.24473e-119	-1.00184	1.24635e-73	-1.89935	0	-1.86577	0	39.43	39.36	37.68	76.95	74.59	75.48
Prupe.8G131100	-2.70964	8.32205e-153	-1.91432	5.67836e-59	-2.23826	4.97962e-67	-1.5312	4.26085e-34	-1.34584	7.93234e-19	10.86	10.92	12.96	7.92	8.72	8.57
Prupe.8G134100	-3.14505	4.43764e-124	-1.38529	1.28033e-14	-1.9635	2.83817e-20	-2.16149	4.04081e-43	-3.07972	1.25496e-66	11.21	7.42	11.03	19.22	20.02	20.89
Prupe.8G136700	-1.18065	1.70198e-303	-1.19652	0	-1.53451	0	-1.89773	0	-2.47514	0	18.45	18.72	18.23	28.86	30.99	29.02
Prupe.8G148400	-1.98581	0	-1.61652	9.02981e-268	-1.37209	2.02025e-173	-1.89428	0	-1.85324	0	85.55	84.46	83.28	78.61	80.37	77.04
Prupe.8G148500	-2.79074	0	-2.3001	0	-4.32868	0	-2.40704	0	-4.97606	0	920.21	911.39	926.98	1113.38	1084.38	1092.78
Prupe.8G159400	-1.81139	0	-1.17352	2.76013e-176	-1.34284	1.99859e-254	-1.04189	8.71194e-134	-1.04607	8.11113e-137	54.5	53.98	52.45	46.78	49.64	48.34
Prupe.8G160200	-2.17829	9.82199e-181	-1.43005	2.73149e-61	-2.77732	1.38639e-121	-1.4043	5.07431e-59	-3.0949	9.3265e-164	48.77	48.73	44.09	122.2	112.4	122.24
Prupe.8G162500	-2.25761	0	-1.77494	0	-2.6626	0	-2.17416	0	-3.95969	0	129.26	127.9	123.5	193.18	188.92	188.84
Prupe.8G179300	-1.9454	0	-1.81677	0	-1.17471	1.96361e-216	-1.66685	0	-1.88734	0	162.49	153.87	158.82	79.59	83.15	82.56
Prupe.8G189600	-1.12179	0	-1.05513	0	-1.06729	6.34394e-287	-3.16978	0	-3.06565	0	137.25	138.79	137.55	254.59	257.64	258.15
Prupe.8G189800	-4.12097	0	-3.6506	0	-3.20321	0	-3.38066	0	-3.81054	0	57.19	60.05	55.13	35.32	34.94	32.76
Prupe.8G191900	-4.30326	0	-1.38154	3.33316e-14	-1.67474	3.23191e-18	-3.91414	1.33398e-243	-4.72926	0	14.92	12.96	15.76	80.98	83.02	87.59
Prupe.8G193700	-6.46459	0	-2.87682	3.35107e-35	-2.75035	1.3809e-31	-3.10858	2.14515e-44	-2.81159	8.06593e-33	8.73	8.76	8.91	20.68	17.55	17.89
Prupe.8G195000	-4.19701	0	-1.96559	5.34147e-90	-1.34206	7.84712e-35	-2.65655	1.78057e-207	-2.44499	7.27731e-158	15.55	15.76	16.13	40.29	39.25	38.9
Prupe.8G197100	-2.90915	0	-3.61489	0	-4.49934	0	-4.36568	0	-5.63932	0	40.06	40.54	41.58	104.06	104.38	105.3
Prupe.8G216600	-2.76864	5.00738e-17	-1.55489	9.61894e-05	-1.93408	3.73775e-05	-3.1199	2.12042e-23	-3.69317	2.2247e-23	5.5	8.05	5.16	14.71	12.16	13.07
Prupe.8G233100	-2.95389	0	-2.56807	0	-2.32804	0	-2.47197	0	-2.66034	0	132.34	128.56	132.62	138.94	143.72	148.47
Prupe.8G243900	-3.15197	1.78997e-276	-2.13871	6.94452e-91	-1.8215	4.28214e-64	-2.20155	8.92365e-99	-2.00854	1.28801e-80	9.54	9.62	9.86	6.67	6.75	6.47
Prupe.8G265900	-2.28369	0	-1.73455	0	-1.73284	2.54981e-206	-2.66615	0	-3.1856	0	69.29	68.98	69.21	169.39	161.93	178.13
Prupe.8G268800	-3.02591	1.47602e-189	-2.06129	3.65174e-64	-2.32531	1.23308e-71	-2.61199	1.25707e-123	-3.02254	3.36051e-148	18.09	20.23	18.33	29.33	27.77	25.37
Prupe.8G269100	-1.73562	2.39637e-48	-1.41028	4.88247e-29	-1.12228	1.81125e-15	-1.71887	3.45415e-47	-1.96176	8.14782e-56	6.52	5.78	6.12	9.06	8.28	8.4
Prupe.I001100	-5.55099	4.23217e-215	-5.15769	1.28633e-162	-4.81718	3.69218e-50	-4.03239	1.03083e-68	-5.20017	1.5017e-64	10.54	9.96	10.53	5.57	5.4	6.77
